# Supplementary material for: Genome-scale CRISPR activation screen uncovers tumor-intrinsic modulators of CD3 bispecific antibody efficacy
Source: PubMed Central journal article supplement (PMC6934601; doi:10.1038/s41598-019-56670-x), 2019-12-27
Supplement: 41598_2019_56670_MOESM1_ESM.pdf [file 41598_2019_56670_MOESM1_ESM.pdf]

## **Supplemental Materials**

**Title:** Genome-scale CRISPR activation screen uncovers tumor-intrinsic modulators of CD3 bispecific antibody efficacy

**Authors:** Corinne E. Decker, Tara Young, Elizabeth Pasnikowski, Joyce Chiu, Hang Song, Yi Wei, Gavin Thurston and Christopher Daly\*

**-Supplemental Methods**

**-9 Supplemental Figures**

**-3 Supplemental Tables**

## Supplemental Methods

**Quantification of CD20 surface levels.** For each tumor cell line, 1 million cells were stained on ice with Quantibrite anti-CD20-PE (BD Biosciences, catalog number 347201) according to manufacturer's protocol and acquired on a BD LSR Fortessa. Antibodies bound per cell were calculated using a standard curve generated with the PE Fluorescence Quantitation Kit (BD Biosciences, catalog number 340495).

**CellTrace labeling.** Tumor cells were resuspended at 1 million cells/ml in PBS and loaded with 2.5  $\mu$ M CellTrace Violet (Invitrogen Molecular Probes, catalog number C34557) or 4  $\mu$ M CellTrace Yellow (Invitrogen Molecular Probes, catalog number C34567) for 15 minutes at 37°C, followed by quenching with complete media. For FACS conjugation assays, freshly-isolated human T cells were resuspended at 2 million cells/ml in PBS and loaded with 5  $\mu$ M CellTrace CFSE (Invitrogen Molecular Probes, catalog number C34554) for 8 minutes at room temperature, followed by quenching with complete media.

**T cell activation, tumor cell killing, and cell clustering assays.** Freshly-isolated T cells were co-cultured with human tumor cell lines at indicated effector:target (E:T) ratios and CD3 bsAb for 24-48 hours. At each time point, cells were collected and stained with fixable viability dye eFluor 780 (Invitrogen eBioscience, catalog number 65-0865-14). In T cell activation experiments, cells were stained with anti-CD4-PE-Cy7 (clone OKT4, BioLegend, catalog number 317414), anti-CD8-BUV737 (clone SK1, BD Biosciences, catalog number 564629), anti-Ki-67-AlexaFluor 647 (clone Ki-67, BioLegend, catalog number 350510), anti-IFN $\gamma$ -Brilliant Violet 711 (clone 4S.B3, BioLegend, catalog number 502540), and anti-Granzyme B-FITC (clone GB11, BioLegend, catalog number 515403). Intracellular staining was performed using the eBioscience Foxp3 kit (Invitrogen, catalog number 00-5523-00) according to manufacturer's protocol. Samples were acquired on a BD LSR Fortessa, and the absolute number of live tumor cells in each sample was quantified using Countbright Absolute Counting Beads (Invitrogen Molecular Probes, catalog number C36950). For cell clustering assays, CellTrace-loaded T cells and tumor cells were mixed and treated with indicated concentrations of CD3 bsAb for 4-18 hours. At each time point, cells were transferred to FACS tubes containing 4% paraformaldehyde (Electron Microscopy Services, catalog number 15710) and immediately acquired on a BD LSR Fortessa.

**CRISPR SAM library reagent preparation.** The genome-scale human transcriptional activation SAM library was purchased from Genscript and amplified at Regeneron. Briefly, Lucigen E.coli 10G Elite electrocompetent cells (Lucigen, catalog number 80026-1) were transformed with the library by electroporation and plated on carbenicillin LB agar. Colonies were harvested, and plasmid DNA was extracted using the EndoFree Plasmid Maxi Prep (Qiagen, catalog number #12362). Sequencing of the original and amplified plasmids confirmed maintenance of library representation. Plasmids encoding the SAM components dCas9-VP64 and MS2-p65-HSF1 were purchased from Genscript. Each plasmid was transfected into HEK293T cells along with lentivirus packaging plasmids psPAX2 (Addgene, catalog number 12260) and pMD2.G (Addgene, catalog number 12259) using Lipofectamine (Thermo Fisher, catalog number 18324020), and virus-containing culture supernatant was concentrated by ultracentrifugation through a 25% sucrose cushion.

**CRISPR transcriptional activation screen in JeKo-1 tumor cells.** The JeKo-1/dCas9/MS2 cell line was established in blasticidin and hygromycin antibiotic selection. For expression of SAM library sgRNAs, JeKo-1/dCas9/MS2 cells were transduced at 500x library representation, followed by zeocin antibiotic selection for 7 days. JeKo-1/SAM library cells were set up in killing assays with freshly-isolated human T cells at 500x library representation. After 48 hours of treatment with 30 ng/ml CD20xCD3 bsAb, T cells were depleted using the EasySep Human CD3 Positive Selection Kit II (Stemcell, catalog number 17851), and surviving tumor cells were recovered in complete media. Surviving JeKo-1/SAM cells were expanded, and the killing assay was repeated as previously described to enrich for resistant tumor cells. In parallel with the T cell killing assays, JeKo-1/SAM library-expressing cells were cultured in complete media for 10 population doublings. JeKo-1/SAM cells for NGS analysis were harvested on day 0 after antibiotic selection (reference control sample), after T cell killing and after 10 population doublings. At each time point, cells were washed in PBS, pelleted, and preserved at -80°C.

To validate potential hits from the screen, individual sgRNAs were purchased from Genscript, packaged in lentivirus as described above, transduced into JeKo-1/dCas9/MS2 cells at a MOI < 0.3, and selected in zeocin for 7 days. Cell surface expression of targeted genes was assessed by FACS using the following antibodies: anti-SPN-FITC (clone MEM-50, BioLegend catalog number

315204), anti-SPN-Brilliant Violet 421 (clone L60, BD Biosciences, catalog number 744813), anti-CD52-FITC (clone 4C8, BD Pharmingen, catalog number 563609), anti-MUC1-APC (clone 16A, BioLegend, catalog number 355608).

***Genomic DNA extraction, PCR amplification/barcoding, and PCR product purification.***

Genomic DNA was extracted from cell pellets using the QIAamp Blood and Cell Culture DNA Maxi Kit (Qiagen, catalog number #13362) according to manufacturer's protocol. 40 parallel reactions (5 ug of genomic DNA/reaction) were amplified using NEBnext High Fidelity 2x Master Mix (New England Biolabs, catalog number M0541) in a single-step reaction of 22 cycles. Sequences of forward primers and barcoded reverse primers are provided in Supplemental methods. PCR products from all reactions were pooled, purified using the Qiagen PCR purification kit (catalog number 28106), and gel purified using the Zymoclean Gel DNA Recovery Kit (Zymo, catalog number D4008). The purified PCR product was diluted to 10 ng/ul and deep-sequenced on an Illumina platform with a total coverage >45 million mapped reads for each sample.

***Tumor cell growth assay.***  $2 \times 10^4$  JeKo-1 cells/well were seeded in a 96-well plate in complete media on day 0. For MV-411 and THP-1 assays,  $6 \times 10^4$  cells were plated with 15 ng/ml Clec12a x CD3 in complete media. At each time point, CellTiter 96 Aqueous One Solution (Promega G3581) was added to each well and incubated for 1 hour at 37C. Absorbance at 490 nm was measured on a Spectramax M3 spectrophotometer (Molecular Devices).

***24 hour killing assay with pre-activated T cells.*** Freshly-isolated T cells were co-cultured with parental JeKo-1 cells (3:1 E:T) and 30 ng/ml CD20xCD3 bsAb to stimulate T cell activation. After 24 hours, JeKo-1 cells were depleted from the culture using the EasySep Human CD19 Positive Selection Kit II (StemCell, catalog number 17854). Remaining T cells were re-plated with CellTrace-loaded tumor cells and indicated concentration of CD3 bsAb. After 24 hours, all cells were collected, stained with fixable viability dye, and acquired on a BD LSR Fortessa to quantify live tumor cells.

***SPN overexpression in Raji cells.*** SPN cDNA was cloned into a pLX-IRES-Neo vector by Genscript. pLX/empty vector and pLX/SPN plasmids were transfected into HEK293T cells along with viral packaging plasmids psPAX2 and pMD2.G using Lipofectamine 2000 (Invitrogen, catalog number

11668019) according to the manufacturer's protocol. Virus-containing culture supernatant was concentrated using Lenti-X Concentrator (Takara, catalog number 63123) according to manufacturer's protocol. Lentiviruses were transduced into Raji cells and stably-expressing cell lines were established in G418 selection.

**Neuraminidase and O-glycosidase treatment.** Tumor cells were treated with 1 U/ml  $\alpha(2\rightarrow3,6,8,9)$  Neuraminidase from *Arthrobacter ureafaciens* (Sigma-Aldrich, catalog number N3786) and 0.2 U/ml O-Glycosidase from *Streptococcus pneumoniae* (Sigma-Aldrich, catalog number G1163). Following incubation for 3 hours at 37°C, cells were pelleted, lysed directly in SDS loading buffer and boiled. Cell lysates were separated by SDS-PAGE on a 7.5% polyacrylamide gel and subjected to western blotting for SPN (Abcam ab235453 rabbit monoclonal used at 1:1000, 4°C overnight)

**Generation of SPN-KO cell lines.** A gRNA targeting human SPN (GGATCCCACACCGTGACAGG) was cloned into the eSpCas9 pLentiCRISPR v2 lentiviral vector by Genscript. The Cas9 empty plasmid and Cas9/SPN gRNA plasmid were transfected into HEK293T cells along with viral packaging plasmids psPAX2 and pMD2.G using Lipofectamine 2000 (Invitrogen, catalog number 11668019) according to the manufacturer's protocol. Virus-containing culture supernatant was concentrated using Lenti-X Concentrator (Takara, catalog number 63123) according to manufacturer's protocol. Lentiviruses were transduced into tumor cells by spinfection at 1200g for 90 minutes on retronectin-coated plates (Takara, catalog number T100B). Stably-expressing cell lines were expanded in puromycin selection.

## Forward and reverse primer sequences for SAM library PCR amplification

**Forward primers (each used in separate reactions to create sufficient library diversity)**

|     |                                                                                                                                                   |
|-----|---------------------------------------------------------------------------------------------------------------------------------------------------|
| F1  | AAT GAT ACG GCG ACC ACC GAG ATC TAC ACT CTT TCC CTA CAC GAC GCT CTT CCG ATC TTA AGT AGA GGC TTT ATA TAT CTT GTG GAA AGG ACG AAA CAC C             |
| F2  | AAT GAT ACG GCG ACC ACC GAG ATC TAC ACT CTT TCC CTA CAC GAC GCT CTT CCG ATC TAT CAT GCT TAG CTT TAT ATA TCT TGT GGA AAG GAC GAA ACA CC            |
| F3  | AAT GAT ACG GCG ACC ACC GAG ATC TAC ACT CTT TCC CTA CAC GAC GCT CTT CCG ATC TGA TGC ACA TCT GCT TTA TAT ATC TTG TGG AAA GGA CGA AAC ACC           |
| F4  | AAT GAT ACG GCG ACC ACC GAG ATC TAC ACT CTT TCC CTA CAC GAC GCT CTT CCG ATC TCG ATT GCT CGA CGC TTT ATA TAT CTT GTG GAA AGG ACG AAA CAC C         |
| F5  | AAT GAT ACG GCG ACC ACC GAG ATC TAC ACT CTT TCC CTA CAC GAC GCT CTT CCG ATC TTC GAT AGC AAT TCG CTT TAT ATA TCT TGT GGA AAG GAC GAA ACA CC        |
| F6  | AAT GAT ACG GCG ACC ACC GAG ATC TAC ACT CTT TCC CTA CAC GAC GCT CTT CCG ATC TAT CGA TAG TTG CTT GCT TTA TAT ATC TTG TGG AAA GGA CGA AAC ACC       |
| F7  | AAT GAT ACG GCG ACC ACC GAG ATC TAC ACT CTT TCC CTA CAC GAC GCT CTT CCG ATC TGA TCG ATC CAG TTA GGC TTT ATA TAT CTT GTG GAA AGG ACG AAA CAC C     |
| F8  | AAT GAT ACG GCG ACC ACC GAG ATC TAC ACT CTT TCC CTA CAC GAC GCT CTT CCG ATC TCG ATC GAT TTG AGC CTG CTT TAT ATA TCT TGT GGA AAG GAC GAA ACA CC    |
| F9  | AAT GAT ACG GCG ACC ACC GAG ATC TAC ACT CTT TCC CTA CAC GAC GCT CTT CCG ATC TAC GAT CGA TAC ACG ATC GCT TTA TAT ATC TTG TGG AAA GGA CGA AAC ACC   |
| F10 | AAT GAT ACG GCG ACC ACC GAG ATC TAC ACT CTT TCC CTA CAC GAC GCT CTT CCG ATC TTA CGA TCG ATG GTC CAG AGC TTT ATA TAT CTT GTG GAA AGG ACG AAA CAC C |

**Each reverse primer has a unique barcode (italicized)- use 1 reverse primer for each sample**

|     |                                                                                                      |
|-----|------------------------------------------------------------------------------------------------------|
| R1  | CAAGCAGAAGACGGCATAACGAGAT <i>TCGCCTTG</i> GTGACTGGAGTTCAGACGTGTGCTCTCCGATCTGCCAAGTTGATAACGGACTAGCCTT |
| R2  | CAAGCAGAAGACGGCATAACGAGAT <i>ATAGCGTC</i> GTGACTGGAGTTCAGACGTGTGCTCTCCGATCTGCCAAGTTGATAACGGACTAGCCTT |
| R3  | CAAGCAGAAGACGGCATAACGAGAT <i>GAAGAAGT</i> GTGACTGGAGTTCAGACGTGTGCTCTCCGATCTGCCAAGTTGATAACGGACTAGCCTT |
| R4  | CAAGCAGAAGACGGCATAACGAGAT <i>ATCTAGG</i> GTGACTGGAGTTCAGACGTGTGCTCTCCGATCTGCCAAGTTGATAACGGACTAGCCTT  |
| R5  | CAAGCAGAAGACGGCATAACGAGAT <i>CGTTACCA</i> GTGACTGGAGTTCAGACGTGTGCTCTCCGATCTGCCAAGTTGATAACGGACTAGCCTT |
| R6  | CAAGCAGAAGACGGCATAACGAGAT <i>GTCTGATG</i> GTGACTGGAGTTCAGACGTGTGCTCTCCGATCTGCCAAGTTGATAACGGACTAGCCTT |
| R7  | CAAGCAGAAGACGGCATAACGAGAT <i>TTACGCAC</i> GTGACTGGAGTTCAGACGTGTGCTCTCCGATCTGCCAAGTTGATAACGGACTAGCCTT |
| R8  | CAAGCAGAAGACGGCATAACGAGAT <i>TTGAATAG</i> GTGACTGGAGTTCAGACGTGTGCTCTCCGATCTGCCAAGTTGATAACGGACTAGCCTT |
| R9  | CAAGCAGAAGACGGCATAACGAGAT <i>TCCTGGT</i> GTGACTGGAGTTCAGACGTGTGCTCTCCGATCTGCCAAGTTGATAACGGACTAGCCTT  |
| R10 | CAAGCAGAAGACGGCATAACGAGAT <i>ACAGGTAT</i> GTGACTGGAGTTCAGACGTGTGCTCTCCGATCTGCCAAGTTGATAACGGACTAGCCTT |
| R11 | CAAGCAGAAGACGGCATAACGAGAT <i>AGGTAAGG</i> GTGACTGGAGTTCAGACGTGTGCTCTCCGATCTGCCAAGTTGATAACGGACTAGCCTT |
| R12 | CAAGCAGAAGACGGCATAACGAGAT <i>AACAATGG</i> GTGACTGGAGTTCAGACGTGTGCTCTCCGATCTGCCAAGTTGATAACGGACTAGCCTT |
| R13 | CAAGCAGAAGACGGCATAACGAGAT <i>ACTGTATC</i> GTGACTGGAGTTCAGACGTGTGCTCTCCGATCTGCCAAGTTGATAACGGACTAGCCTT |

### **Supplemental Figure 1. CD4+ and CD8+ T cells are activated in a mixed killing assay of JeKo-1 and RL tumor cells**

Healthy donor T cells were cultured with a 1:1 mix of JeKo-1 and RL tumor cells and treated with 30 ng/ml CD20xCD3 bsAb or CD3-binding isotype control antibody for 48 hours followed by staining for IFN $\gamma$  and Granzyme B (GzmB)

### **Supplemental Figure 2. Surface expression of potential T cell ligands on Raji, RL, and JeKo-1 tumor cells**

Surface expression of T cell ligands on tumor cells was assessed using the LEGENDscreen Human PE kit. Histograms show the expression of well-characterized co-stimulatory or co-inhibitory molecule expression on each cell line.

### **Supplemental Figure 3. Validation of CRISPR-mediated transcriptional activation in JeKo-1/dCas9/MS2 cells**

- (A) JeKo-1/dCas9/MS2 cells were transduced with a non-targeting control sgRNA or sgRNA targeting SERPINB9. Following antibiotic selection, cells were lysed and subjected to Western blot analysis to detect SERPINB9 protein levels. Uncropped blots shown in **Figure S8E**.
- (B) JeKo-1/dCas9/MS2 cells were transduced with a non-targeting control sgRNA or sgRNAs targeting PD-L1. Following antibiotic selection, cells were lysed and subjected to Western blot analysis to detect PD-L1 protein levels. Uncropped blots shown in **Figure S8F**.
- (C) FACS detection of surface PD-L1 in JeKo-1/dCas9/MS2 cells transduced with non-targeting control sgRNA or sgRNAs targeting PD-L1.

### **Supplemental Figure 4. Validation of JeKo/SAM CRISPR screen hits**

- (A) Comparison of normalized sgRNA counts in the tumor cell population collected after 10 population doublings in vitro compared to tumor cells on day 0. Normalized sgRNA counts were averaged across triplicate samples. R<sup>2</sup> value calculated by Pearson's correlation.
- (B-D) Three sgRNAs each for SPN (B), CD52 (C), and MUC1 (D) were individually packaged in lentivirus and transduced into JeKo-1/dCas9/MS2 cells. Transduced tumor cells were stained with specific antibodies to measure cell surface levels of the targeted gene. For each gene, the 2 sgRNAs that were significantly enriched after CD20xCD3-mediated T cell killing in the screen are shown in boxes.
- (C) Viable cell number of JeKo-1/NT, JeKo-1/SPN, JeKo-1/CD52, and JeKo-1/MUC1 was measured on day 0 at the time of plating and after 24 hours in complete media. Increased expression of SPN, CD52 or MUC1 does not augment JeKo-1 cell growth in a 24-hour period

### **Supplemental Figure 5. MUC1 limits clustering of JeKo-1 cells with T cells and decreases killing**

- (A) A competition killing assay was performed to evaluate the effect of MUC1 overexpression on JeKo-1 cell sensitivity to CD20xCD3-mediated T cell killing. Representative FACS plots show the proportions of live JeKo-1/NT and JeKo-1/MUC1

cells after 24 hours of co-culture with T cells and CD20xCD3 bsAb or CD3-binding isotype control antibody.

- (B) The ratio of live JeKo-1/MUC1 cells to JeKo-1/NT cells was calculated after treatment with CD20xCD3 bsAb or CD3-binding isotype control antibody. JeKo-1/dCas9/MS2 cells expressing MUC1 sg1 (which effectively induces MUC1 expression and was enriched in the screen) were less sensitive to T cell killing, while the ineffective sg2 (fails to induce MUC1 expression) did not confer protection from killing. **\*\*P < 0.01**, by two-tailed T-test.
- (C) To detect T cell-tumor cell clusters, healthy donor T cells were labeled with CellTrace CFSE and tumor cells were labeled with CellTrace Violet (CTV) or CellTrace Yellow (CTY). Differentially labeled tumor cells were mixed at a 1:1 ratio and co-cultured with labeled T cells (3:1 E:T) plus 30 ng/ml CD20xCD3 bsAb or CD3-binding isotype control antibody. After 18 hours, cells were collected, fixed in 4% paraformaldehyde and immediately analyzed by FACS. Representative plots show the detection of T cell-tumor cell clusters. JeKo-1/NT cells in T cell conjugates are CTV+ FITC+, and JeKo-1/MUC1 cells in T cell conjugates are CTY+ FITC+. Note that MUC1 sg1 is highly effective at inducing MUC1 expression while sg2 is ineffective.
- (D) The average percent of tumor cells in conjugates with T cells was quantified across triplicate samples. The extent of clustering was not affected by CellTrace dyes. **\*\*\*P < 0.001**, by two-tailed T-test.

#### **Supplemental Figure 6. CD20 surface expression is decreased in JeKo-1/CD52 cells**

- (A) CD20 surface expression on modified JeKo-1/dCas9/MS2 cells was quantified by staining with Quantibrite anti-CD20. CD20 antigen density is reduced on JeKo-1/CD52 cells.
- (B) Total CD52 protein was assessed by Western blot analysis of JeKo-1/NT and JeKo-1/CD52 cells. Uncropped blots shown in **Figure S9G**.

#### **Supplemental Figure 7. SPN knockout in RL cells**

- (A) Western blot detection of SPN protein in total cell lysates confirms SPN knockout in targeted RL cells. Uncropped blots shown in **Figure S9H**
- (B) A competition killing assay was performed to evaluate the effect of SPN knockout on RL cell sensitivity to CD20xCD3-mediated T cell killing. RL cells transduced with the effective gRNA2 were mixed with RL cells expressing the ineffective gRNA3 (retain SPN expression). The extent of killing of each RL cell population was quantified after 48 hrs of co-culture with T cells and CD20xCD3.
- (C) The ratio of live RL/SPN KO (g2) to RL (g3) cells was calculated after treatment with CD20xCD3 bsAb or CD3-binding isotype control antibody. **\* P < 0.05**, **\*\* P < 0.01**, by two-tailed T-test

#### **Supplemental Figure 8. SPN knockout in AML cell lines**

- (A) Western blot detection of SPN protein in total cell lysates confirms SPN knockout in targeted MV-4-11 and THP-1 cells. Uncropped blots shown in **Figure S9I**.
- (B) Representative plots showing the detection of T cell-tumor cell clusters. SPN KO augments clustering of MV-4-11 cells

- (C) Representative plots showing the detection of T cell-tumor cell clusters. SPN KO augments clustering of THP-1 cells
- (D) MV-4-11/Cas9 and MV-4-11/SPN KO cells were cultured with 15 ng/ml Clec12a x CD3 bsAb for 24 hours and relative cell growth was determined.
- (E) THP-1/Cas9 and THP-1/SPN KO cells were cultured with 15 ng/ml Clec12a x CD3 bsAb for 24 hours and relative cell growth was determined.

**Supplemental Figure 9. Uncropped Western blots**

- (A) Uncropped blots corresponding to Figure 6A.
- (B) Uncropped blots corresponding to Figure 6B.
- (C) Uncropped blots corresponding to Figure 6C.
- (D) Uncropped blots corresponding to Figure 6F.
- (E) Uncropped blots corresponding to Figure S3A.
- (F) Uncropped blots corresponding to Figure S3B.
- (G) Uncropped blots corresponding to Figure S6B.
- (H) Uncropped blots corresponding to Figure S7A.
- (I) Uncropped blots corresponding to Figure S8A.

**Supplemental Table 1.** sgRNAs enriched  $\geq 1.5$ -fold after T cell killing compared to Day 0 reference control,  $p < 0.05$

**Supplemental Table 2.** Genes with at least 2 sgRNAs enriched  $\geq 1.5$ -fold after T cell killing compared to Day 0 reference control,  $p < 0.05$

**Supplemental Table 3.** sgRNAs enriched  $\geq 1.5$ -fold after 10 population doublings compared to Day 0 reference control,  $p < 0.05$

Supplemental Figure 1 CD4+ and CD8+ T cells are activated in a mixed killing assay of JeKo-1 and RL tumor cells



Supplemental Figure 2. LEGENDscreen: surface expression of potential T cell ligands on Raji, RL, and JeKo-1 tumor cells



Supplemental Figure 3. Validation of JeKo/dCas9/MS2 cells

A



B



C



**Supplemental Figure 4. Validation of JeKo/SAM CRISPR screen hits**

**A**



**B**



**C**



**D**



**E**



Supplemental Figure 5. Muc1 limits CD20xCD3-mediated JeKo-1 cell killing and clustering with T cells



Supplemental Figure 6 CD20 surface expression is decreased in JeKo/CD52 cells

A

### CD20 surface staining



B

### Total cell lysate



Supplemental Figure 7 SPN knockout in RL cells



Supplemental Figure 8 SPN knockout in AML cell lines



Supplemental Figure 9. Uncropped Western blots



Supplemental Table 1. sgRNAs enriched  $\geq 1.5$ -fold after T cell killing compared to Day 0 reference control,  $p < 0.05$

| Enrichment over Day 0 | T-Test | Access. Number | Gene Symbol     |
|-----------------------|--------|----------------|-----------------|
| 27.63                 | 0.0221 | NM_014619      | <i>GRIK4</i>    |
| 12.20                 | 0.0056 | NM_001204294   | <i>MUC1</i>     |
| 10.15                 | 0.0003 | NM_001136205   | <i>KCTD1</i>    |
| 9.09                  | 0.0255 | NM_001037171   | <i>ACOT9</i>    |
| 8.88                  | 0.0282 | NM_001172697   | <i>TSFM</i>     |
| 8.13                  | 0.0123 | NM_152629      | <i>GLIS3</i>    |
| 7.66                  | 0.0299 | NM_002865      | <i>RAB2A</i>    |
| 7.63                  | 0.0230 | NM_001525      | <i>HCRTR1</i>   |
| 7.22                  | 0.0391 | NM_177454      | <i>FAM171B</i>  |
| 6.93                  | 0.0331 | NM_020851      | <i>ISLR2</i>    |
| 6.31                  | 0.0159 | NM_001143680   | <i>GSTK1</i>    |
| 6.24                  | 0.0499 | NM_176815      | <i>DHFR2</i>    |
| 5.76                  | 0.0032 | NM_001803      | <i>CD52</i>     |
| 5.60                  | 0.0097 | NM_080552      | <i>SLC32A1</i>  |
| 5.57                  | 0.0272 | NM_139283      | <i>PPTC7</i>    |
| 5.47                  | 0.0308 | NM_001010909   | <i>MUC21</i>    |
| 5.11                  | 0.0413 | NM_001030288   | <i>SPN</i>      |
| 5.10                  | 0.0496 | NM_001030288   | <i>SPN</i>      |
| 4.96                  | 0.0002 | NM_173598      | <i>KSR2</i>     |
| 4.94                  | 0.0083 | NM_023009      | <i>MARCKSL1</i> |
| 4.85                  | 0.0004 | NM_002699      | <i>POU3F1</i>   |
| 4.68                  | 0.0157 | NM_022550      | <i>XRCC4</i>    |
| 4.58                  | 0.0085 | NM_016240      | <i>SCARA3</i>   |
| 4.57                  | 0.0004 | NM_014079      | <i>KLF15</i>    |
| 4.53                  | 0.0236 | NM_001079881   | <i>PRKD2</i>    |
| 4.44                  | 0.0063 | NM_001803      | <i>CD52</i>     |
| 4.28                  | 0.0344 | NM_001278544   | <i>C8B</i>      |
| 4.27                  | 0.0266 | NM_001425      | <i>EMP3</i>     |
| 4.23                  | 0.0145 | NM_001098205   | <i>HNRNPF</i>   |
| 4.12                  | 0.0130 | NM_001172664   | <i>RAB40C</i>   |
| 4.10                  | 0.0313 | NM_003123      | <i>SPN</i>      |
| 4.07                  | 0.0035 | NM_000744      | <i>CHRNA4</i>   |
| 4.04                  | 0.0184 | NM_032511      | <i>FAXC</i>     |
| 3.95                  | 0.0467 | NM_174892      | <i>CD300LB</i>  |

| <b>Enrichment over Day 0</b> | <b>T-Test</b> | <b>Access. Number</b> | <b>Gene Symbol</b> |
|------------------------------|---------------|-----------------------|--------------------|
| 3.88                         | 0.0068        | NM_207391             | <i>RGS9BP</i>      |
| 3.85                         | 0.0131        | NM_001289823          | <i>FURIN</i>       |
| 3.82                         | 0.0046        | NM_017613             | <i>DONSON</i>      |
| 3.78                         | 0.0292        | NM_003259             | <i>ICAM5</i>       |
| 3.77                         | 0.0080        | NM_006412             | <i>AGPAT2</i>      |
| 3.64                         | 0.0027        | NM_005304             | <i>FFAR3</i>       |
| 3.56                         | 0.0000        | NM_153046             | <i>TDRD9</i>       |
| 3.54                         | 0.0164        | NM_001079530          | <i>CFC1B</i>       |
| 3.53                         | 0.0047        | NM_020979             | <i>SH2B2</i>       |
| 3.44                         | 0.0471        | NM_003290             | <i>TPM4</i>        |
| 3.41                         | 0.0005        | NM_005603             | <i>ATP8B1</i>      |
| 3.40                         | 0.0022        | NM_001278116          | <i>L1CAM</i>       |
| 3.39                         | 0.0274        | NM_001256302          | <i>ETF1</i>        |
| 3.35                         | 0.0253        | NM_006010             | <i>MANF</i>        |
| 3.34                         | 0.0233        | NM_145109             | <i>MAP2K3</i>      |
| 3.34                         | 0.0333        | NM_080622             | <i>ABHD16B</i>     |
| 3.33                         | 0.0126        | NM_002698             | <i>POU2F2</i>      |
| 3.33                         | 0.0460        | NM_001513             | <i>GSTZ1</i>       |
| 3.26                         | 0.0489        | NM_201550             | <i>LRRC10</i>      |
| 3.25                         | 0.0091        | NM_001280             | <i>CIRBP</i>       |
| 3.24                         | 0.0374        | NM_001253901          | <i>MEST</i>        |
| 3.21                         | 0.0108        | NM_001110354          | <i>ZP3</i>         |
| 3.18                         | 0.0186        | NM_138433             | <i>KLHDC7B</i>     |
| 3.18                         | 0.0003        | NM_001004470          | <i>ST8SIA6</i>     |
| 3.14                         | 0.0248        | NM_032152             | <i>PRAM1</i>       |
| 3.10                         | 0.0457        | NM_001134775          | <i>KLC2</i>        |
| 3.08                         | 0.0475        | NM_006278             | <i>ST3GAL4</i>     |
| 3.03                         | 0.0482        | NM_001098204          | <i>HNRNPF</i>      |
| 3.02                         | 0.0003        | NM_001164688          | <i>RD3</i>         |
| 3.02                         | 0.0290        | NM_001290061          | <i>SEMA3B</i>      |
| 3.02                         | 0.0174        | NM_001198656          | <i>AKAP2</i>       |
| 3.01                         | 0.0140        | NM_002135             | <i>NR4A1</i>       |
| 3.01                         | 0.0013        | NM_006213             | <i>PHKG1</i>       |
| 3.00                         | 0.0249        | NM_001145033          | <i>C11orf96</i>    |
| 3.00                         | 0.0005        | NM_020992             | <i>PDLIM1</i>      |
| 2.99                         | 0.0150        | NM_000232             | <i>SGCB</i>        |
| 2.97                         | 0.0039        | NM_001270616          | <i>PROX1</i>       |

| <b>Enrichment over Day 0</b> | <b>T-Test</b> | <b>Access. Number</b> | <b>Gene Symbol</b> |
|------------------------------|---------------|-----------------------|--------------------|
| 2.95                         | 0.0423        | NM_001257378          | <i>SEC14L3</i>     |
| 2.95                         | 0.0066        | NM_020871             | <i>LRCH2</i>       |
| 2.95                         | 0.0134        | NM_001012728          | <i>DPRX</i>        |
| 2.95                         | 0.0226        | NM_005033             | <i>EXOSC9</i>      |
| 2.94                         | 0.0009        | NM_002630             | <i>PGC</i>         |
| 2.93                         | 0.0456        | NM_005113             | <i>GOLGA5</i>      |
| 2.92                         | 0.0324        | NM_182488             | <i>USP12</i>       |
| 2.92                         | 0.0366        | NM_019595             | <i>ITSN2</i>       |
| 2.91                         | 0.0431        | NM_018842             | <i>BAIAP2L1</i>    |
| 2.91                         | 0.0259        | NM_153240             | <i>NPHP3</i>       |
| 2.89                         | 0.0479        | NM_018017             | <i>CCDC186</i>     |
| 2.85                         | 0.0114        | NM_001012279          | <i>SOGA3</i>       |
| 2.82                         | 0.0165        | NM_001270991          | <i>EPGN</i>        |
| 2.81                         | 0.0090        | NM_000391             | <i>TPP1</i>        |
| 2.81                         | 0.0039        | NM_024761             | <i>MOB3B</i>       |
| 2.80                         | 0.0340        | NM_001135776          | <i>ZBTB43</i>      |
| 2.80                         | 0.0285        | NM_001048195          | <i>RCC1</i>        |
| 2.76                         | 0.0083        | NM_001286693          | <i>RGS22</i>       |
| 2.76                         | 0.0230        | NM_024808             | <i>BORA</i>        |
| 2.76                         | 0.0005        | NM_000524             | <i>HTR1A</i>       |
| 2.76                         | 0.0001        | NM_197962             | <i>GLRX2</i>       |
| 2.75                         | 0.0397        | NM_024531             | <i>SLC52A2</i>     |
| 2.74                         | 0.0001        | NM_001009568          | <i>SMPDL3B</i>     |
| 2.74                         | 0.0171        | NM_001257392          | <i>CD63</i>        |
| 2.72                         | 0.0416        | NM_003044             | <i>SLC6A12</i>     |
| 2.71                         | 0.0307        | NM_001113203          | <i>NACA</i>        |
| 2.70                         | 0.0269        | NM_001282765          | <i>CDV3</i>        |
| 2.70                         | 0.0424        | NM_001014380          | <i>KATNAL1</i>     |
| 2.69                         | 0.0335        | NM_001277163          | <i>CEACAM3</i>     |
| 2.69                         | 0.0007        | NM_138350             | <i>THAP3</i>       |
| 2.69                         | 0.0010        | NM_022659             | <i>EBF2</i>        |
| 2.67                         | 0.0503        | NM_004429             | <i>EFNB1</i>       |
| 2.66                         | 0.0117        | NM_001160226          | <i>CNR1</i>        |
| 2.66                         | 0.0109        | NM_207116             | <i>RNF216</i>      |
| 2.66                         | 0.0079        | NM_207316             | <i>TMEM207</i>     |
| 2.65                         | 0.0052        | NM_145044             | <i>ZNF501</i>      |
| 2.65                         | 0.0314        | NM_001005855          | <i>ATP8B2</i>      |

| <b>Enrichment over Day 0</b> | <b>T-Test</b> | <b>Access. Number</b> | <b>Gene Symbol</b> |
|------------------------------|---------------|-----------------------|--------------------|
| 2.64                         | 0.0085        | NM_001080442          | <i>SLC38A8</i>     |
| 2.63                         | 0.0267        | NM_006662             | <i>SRCAP</i>       |
| 2.63                         | 0.0000        | NM_001168393          | <i>CREBRF</i>      |
| 2.63                         | 0.0238        | NM_015140             | <i>TLL12</i>       |
| 2.62                         | 0.0150        | NM_145912             | <i>NFAM1</i>       |
| 2.62                         | 0.0200        | NM_001085481          | <i>MAP1LC3B2</i>   |
| 2.61                         | 0.0013        | NM_001278613          | <i>PCDH1</i>       |
| 2.61                         | 0.0057        | NM_020873             | <i>LRRN1</i>       |
| 2.60                         | 0.0033        | NM_006290             | <i>TNFAIP3</i>     |
| 2.58                         | 0.0041        | NM_002509             | <i>NKX2-2</i>      |
| 2.58                         | 0.0004        | NM_014434             | <i>NDOR1</i>       |
| 2.55                         | 0.0454        | NM_003503             | <i>CDC7</i>        |
| 2.54                         | 0.0336        | NM_015325             | <i>ICE1</i>        |
| 2.54                         | 0.0503        | NM_006829             | <i>ADIRF</i>       |
| 2.54                         | 0.0020        | NM_021960             | <i>MCL1</i>        |
| 2.52                         | 0.0131        | NM_033554             | <i>HLA-DPA1</i>    |
| 2.52                         | 0.0487        | NM_144992             | <i>VWA3B</i>       |
| 2.50                         | 0.0006        | NM_001258346          | <i>PACRGL</i>      |
| 2.50                         | 0.0158        | NM_205849             | <i>FAM9B</i>       |
| 2.49                         | 0.0414        | NM_001160111          | <i>NOS3</i>        |
| 2.49                         | 0.0320        | NM_032687             | <i>CYHR1</i>       |
| 2.49                         | 0.0007        | NM_177543             | <i>PLPP2</i>       |
| 2.49                         | 0.0001        | NM_001256510          | <i>SSBP1</i>       |
| 2.48                         | 0.0312        | NM_001145276          | <i>ZFY</i>         |
| 2.48                         | 0.0038        | NM_001127215          | <i>GFI1</i>        |
| 2.47                         | 0.0032        | NM_001040100          | <i>SPTSSB</i>      |
| 2.47                         | 0.0182        | NM_001252406          | <i>ZBTB7B</i>      |
| 2.47                         | 0.0159        | NM_001267698          | <i>CD63</i>        |
| 2.47                         | 0.0217        | NM_024959             | <i>SLC8B1</i>      |
| 2.46                         | 0.0479        | NM_207352             | <i>CYP4V2</i>      |
| 2.46                         | 0.0220        | NM_016175             | <i>C5orf45</i>     |
| 2.46                         | 0.0254        | NM_001290104          | <i>ZP2</i>         |
| 2.46                         | 0.0136        | NM_006984             | <i>CLDN10</i>      |
| 2.45                         | 0.0250        | NM_001256653          | <i>ZNF43</i>       |
| 2.45                         | 0.0462        | NM_001005241          | <i>OR4N4</i>       |
| 2.44                         | 0.0108        | NM_199047             | <i>TBPL2</i>       |
| 2.44                         | 0.0001        | NM_001282116          | <i>RFX3</i>        |

| <b>Enrichment over Day 0</b> | <b>T-Test</b> | <b>Access. Number</b> | <b>Gene Symbol</b> |
|------------------------------|---------------|-----------------------|--------------------|
| 2.44                         | 0.0003        | NM_024122             | <i>APOO</i>        |
| 2.44                         | 0.0376        | NM_001127196          | <i>CNBP</i>        |
| 2.43                         | 0.0009        | NM_001282741          | <i>OSBP2</i>       |
| 2.43                         | 0.0196        | NM_175883             | <i>OR7D2</i>       |
| 2.42                         | 0.0061        | NM_006577             | <i>B3GNT2</i>      |
| 2.42                         | 0.0188        | NM_001162894          | <i>KIAA0040</i>    |
| 2.42                         | 0.0145        | NM_152755             | <i>CNPY4</i>       |
| 2.41                         | 0.0258        | NM_001012337          | <i>ROPN1B</i>      |
| 2.41                         | 0.0317        | NM_002227             | <i>JAK1</i>        |
| 2.40                         | 0.0185        | NM_080836             | <i>STK35</i>       |
| 2.40                         | 0.0357        | NM_001110354          | <i>ZP3</i>         |
| 2.40                         | 0.0085        | NM_024980             | <i>GPR157</i>      |
| 2.40                         | 0.0213        | NM_001159587          | <i>CD109</i>       |
| 2.40                         | 0.0073        | NM_032107             | <i>L3MBTL1</i>     |
| 2.38                         | 0.0342        | NM_022479             | <i>WBSCR17</i>     |
| 2.38                         | 0.0143        | NM_138723             | <i>BCL2L14</i>     |
| 2.37                         | 0.0023        | NM_012316             | <i>KPNA6</i>       |
| 2.37                         | 0.0012        | NM_002235             | <i>KCNA6</i>       |
| 2.37                         | 0.0046        | NM_001282687          | <i>SH3YL1</i>      |
| 2.36                         | 0.0302        | NM_001178045          | <i>SLC44A4</i>     |
| 2.36                         | 0.0093        | NM_014357             | <i>LCE2B</i>       |
| 2.36                         | 0.0323        | NM_016548             | <i>GOLM1</i>       |
| 2.36                         | 0.0271        | NM_013305             | <i>ST8SIA5</i>     |
| 2.35                         | 0.0260        | NM_001276469          | <i>B4GALNT1</i>    |
| 2.34                         | 0.0085        | NM_015387             | <i>MOB4</i>        |
| 2.34                         | 0.0231        | NM_001286754          | <i>SYNPO2</i>      |
| 2.34                         | 0.0402        | NM_001244871          | <i>DAB2</i>        |
| 2.32                         | 0.0447        | NM_145214             | <i>TRIM11</i>      |
| 2.32                         | 0.0167        | NM_001130487          | <i>NDRG4</i>       |
| 2.32                         | 0.0435        | NM_000537             | <i>REN</i>         |
| 2.32                         | 0.0029        | NM_020744             | <i>MTA3</i>        |
| 2.32                         | 0.0249        | NM_001029863          | <i>C6orf120</i>    |
| 2.32                         | 0.0087        | NM_181361             | <i>KCNMB2</i>      |
| 2.31                         | 0.0152        | NM_001082968          | <i>TOM1L2</i>      |
| 2.30                         | 0.0457        | NM_178504             | <i>DNAH12</i>      |
| 2.29                         | 0.0339        | NM_017676             | <i>GIN1</i>        |
| 2.28                         | 0.0228        | NM_001076785          | <i>SLC7A6</i>      |

| <b>Enrichment over Day 0</b> | <b>T-Test</b> | <b>Access. Number</b> | <b>Gene Symbol</b> |
|------------------------------|---------------|-----------------------|--------------------|
| 2.28                         | 0.0018        | NM_002969             | <i>MAPK12</i>      |
| 2.28                         | 0.0121        | NM_013453             | <i>SPANXA1</i>     |
| 2.28                         | 0.0093        | NM_001191058          | <i>PDE1C</i>       |
| 2.28                         | 0.0008        | NM_001282864          | <i>SLC2A11</i>     |
| 2.28                         | 0.0243        | NM_001795             | <i>CDH5</i>        |
| 2.28                         | 0.0072        | NM_006824             | <i>EBNA1BP2</i>    |
| 2.27                         | 0.0356        | NM_001085420          | <i>PLSCR5</i>      |
| 2.27                         | 0.0087        | NM_032693             | <i>NAA11</i>       |
| 2.27                         | 0.0468        | NM_018416             | <i>FOXJ2</i>       |
| 2.26                         | 0.0003        | NM_001256163          | <i>BIRC2</i>       |
| 2.26                         | 0.0399        | NM_004760             | <i>STK17A</i>      |
| 2.26                         | 0.0275        | NM_001193301          | <i>SEMA4A</i>      |
| 2.26                         | 0.0356        | NM_183419             | <i>RNF19A</i>      |
| 2.26                         | 0.0424        | NM_022463             | <i>NXN</i>         |
| 2.25                         | 0.0037        | NM_206860             | <i>TACC2</i>       |
| 2.24                         | 0.0179        | NM_022165             | <i>LIN7B</i>       |
| 2.24                         | 0.0190        | NM_207401             | <i>C1orf229</i>    |
| 2.24                         | 0.0198        | NM_033518             | <i>SLC38A5</i>     |
| 2.24                         | 0.0022        | NM_005828             | <i>DCAF7</i>       |
| 2.23                         | 0.0144        | NM_022153             | <i>C10orf54</i>    |
| 2.23                         | 0.0428        | NM_001161357          | <i>FCHO1</i>       |
| 2.22                         | 0.0044        | NM_001282965          | <i>SLA</i>         |
| 2.22                         | 0.0035        | NM_001143827          | <i>MAPRE2</i>      |
| 2.22                         | 0.0085        | NM_021962             | <i>ABR</i>         |
| 2.21                         | 0.0493        | NM_005723             | <i>TSPAN5</i>      |
| 2.21                         | 0.0002        | NM_001242860          | <i>PRKACB</i>      |
| 2.21                         | 0.0111        | NM_018026             | <i>PACS1</i>       |
| 2.21                         | 0.0016        | NM_001031700          | <i>FAM198B</i>     |
| 2.21                         | 0.0152        | NM_000685             | <i>AGTR1</i>       |
| 2.20                         | 0.0003        | NM_000056             | <i>BCKDHB</i>      |
| 2.20                         | 0.0298        | NM_002940             | <i>ABCE1</i>       |
| 2.19                         | 0.0018        | NM_012333             | <i>MYCBP</i>       |
| 2.19                         | 0.0216        | NM_152470             | <i>RNF165</i>      |
| 2.19                         | 0.0022        | NM_001127896          | <i>CHST8</i>       |
| 2.18                         | 0.0396        | NM_001286771          | <i>ANKRD17</i>     |
| 2.18                         | 0.0038        | NM_001267560          | <i>TJP3</i>        |
| 2.18                         | 0.0267        | NM_001164405          | <i>BHLHA9</i>      |

| <b>Enrichment over Day 0</b> | <b>T-Test</b> | <b>Access. Number</b> | <b>Gene Symbol</b> |
|------------------------------|---------------|-----------------------|--------------------|
| 2.18                         | 0.0283        | NM_198320             | <i>CPM</i>         |
| 2.17                         | 0.0152        | NM_001291410          | <i>LOC653602</i>   |
| 2.17                         | 0.0417        | NM_001289401          | <i>ZNF135</i>      |
| 2.17                         | 0.0254        | NM_001145648          | <i>RASGRF1</i>     |
| 2.17                         | 0.0346        | NM_152263             | <i>TPM3</i>        |
| 2.16                         | 0.0066        | NM_004599             | <i>SREBF2</i>      |
| 2.16                         | 0.0348        | NM_001170331          | <i>LANCL3</i>      |
| 2.16                         | 0.0263        | NM_005398             | <i>PPP1R3C</i>     |
| 2.16                         | 0.0088        | NM_173824             | <i>C3orf38</i>     |
| 2.16                         | 0.0012        | NM_024092             | <i>TMEM109</i>     |
| 2.16                         | 0.0220        | NM_001013706          | <i>PLIN5</i>       |
| 2.16                         | 0.0414        | NM_001039877          | <i>STRN4</i>       |
| 2.16                         | 0.0434        | NM_001097622          | <i>OCM</i>         |
| 2.16                         | 0.0264        | NM_001282290          | <i>ARHGAP27</i>    |
| 2.15                         | 0.0054        | NM_022725             | <i>FANCF</i>       |
| 2.15                         | 0.0117        | NM_001100592          | <i>ATP6V0E2</i>    |
| 2.15                         | 0.0245        | NM_032451             | <i>SPIRE2</i>      |
| 2.15                         | 0.0345        | NM_001005492          | <i>OR5J2</i>       |
| 2.14                         | 0.0365        | NM_001282146          | <i>NLGN4X</i>      |
| 2.14                         | 0.0037        | NM_000417             | <i>IL2RA</i>       |
| 2.14                         | 0.0325        | NM_206827             | <i>RASL11A</i>     |
| 2.14                         | 0.0252        | NM_012401             | <i>PLXNB2</i>      |
| 2.14                         | 0.0029        | NM_023035             | <i>CACNA1A</i>     |
| 2.14                         | 0.0007        | NM_003000             | <i>SDHB</i>        |
| 2.13                         | 0.0026        | NM_000403             | <i>GALE</i>        |
| 2.13                         | 0.0399        | NM_002863             | <i>PYGL</i>        |
| 2.13                         | 0.0046        | NM_018890             | <i>RAC1</i>        |
| 2.13                         | 0.0105        | NM_001145643          | <i>PHGR1</i>       |
| 2.13                         | 0.0134        | NM_001002258          | <i>ATP5G3</i>      |
| 2.13                         | 0.0461        | NM_002317             | <i>LOX</i>         |
| 2.13                         | 0.0339        | NM_001142462          | <i>OSR2</i>        |
| 2.12                         | 0.0165        | NM_178454             | <i>DRAM2</i>       |
| 2.12                         | 0.0090        | NM_003893             | <i>LDB1</i>        |
| 2.12                         | 0.0010        | NM_194454             | <i>KRIT1</i>       |
| 2.12                         | 0.0161        | NM_001113491          | <i>SEPT9</i>       |
| 2.11                         | 0.0002        | NM_001143764          | <i>SYCE1</i>       |
| 2.11                         | 0.0136        | NM_000161             | <i>GCH1</i>        |

| <b>Enrichment over Day 0</b> | <b>T-Test</b> | <b>Access. Number</b> | <b>Gene Symbol</b> |
|------------------------------|---------------|-----------------------|--------------------|
| 2.11                         | 0.0005        | NM_001166434          | <i>ITIH1</i>       |
| 2.11                         | 0.0011        | NM_004450             | <i>ERH</i>         |
| 2.11                         | 0.0055        | NM_021960             | <i>MCL1</i>        |
| 2.10                         | 0.0174        | NM_017837             | <i>PIGV</i>        |
| 2.10                         | 0.0377        | NM_007373             | <i>SHOC2</i>       |
| 2.10                         | 0.0082        | NM_001198695          | <i>MFAP4</i>       |
| 2.09                         | 0.0476        | NM_001020819          | <i>MYADM</i>       |
| 2.09                         | 0.0441        | NM_021965             | <i>PGM5</i>        |
| 2.09                         | 0.0094        | NM_001159531          | <i>BEGAIN</i>      |
| 2.09                         | 0.0419        | NM_001159576          | <i>SCNN1A</i>      |
| 2.09                         | 0.0157        | NM_005263             | <i>GFI1</i>        |
| 2.09                         | 0.0063        | NM_058244             | <i>WNT8A</i>       |
| 2.08                         | 0.0260        | NM_002099             | <i>GYPA</i>        |
| 2.08                         | 0.0003        | NM_138334             | <i>JOSD2</i>       |
| 2.08                         | 0.0016        | NM_001146344          | <i>PRAMEF11</i>    |
| 2.07                         | 0.0052        | NM_005534             | <i>IFNGR2</i>      |
| 2.07                         | 0.0020        | NM_000363             | <i>TNNI3</i>       |
| 2.06                         | 0.0274        | NM_024831             | <i>TGS1</i>        |
| 2.06                         | 0.0149        | NM_138801             | <i>GALM</i>        |
| 2.06                         | 0.0442        | NM_001206672          | <i>RIC3</i>        |
| 2.06                         | 0.0262        | NM_001080556          | <i>CFAP52</i>      |
| 2.06                         | 0.0456        | NM_001145077          | <i>LRRC10B</i>     |
| 2.06                         | 0.0304        | NM_016026             | <i>RDH11</i>       |
| 2.06                         | 0.0156        | NM_133640             | <i>MED22</i>       |
| 2.05                         | 0.0002        | NM_001160302          | <i>SYNJ1</i>       |
| 2.05                         | 0.0118        | NM_018694             | <i>ARL6IP4</i>     |
| 2.05                         | 0.0023        | NM_014800             | <i>ELMO1</i>       |
| 2.05                         | 0.0344        | NM_173598             | <i>KSR2</i>        |
| 2.05                         | 0.0361        | NM_001105203          | <i>RUSC1</i>       |
| 2.05                         | 0.0212        | NM_001207005          | <i>ZNF233</i>      |
| 2.05                         | 0.0034        | NM_133433             | <i>NIPBL</i>       |
| 2.04                         | 0.0489        | NM_001286680          | <i>NPM2</i>        |
| 2.04                         | 0.0029        | NM_030807             | <i>SLC2A11</i>     |
| 2.04                         | 0.0386        | NM_001145784          | <i>BORCS8</i>      |
| 2.04                         | 0.0011        | NM_014725             | <i>STARD8</i>      |
| 2.04                         | 0.0017        | NM_175850             | <i>DNMT3B</i>      |
| 2.03                         | 0.0427        | NM_001168407          | <i>RIMS1</i>       |

| <b>Enrichment over Day 0</b> | <b>T-Test</b> | <b>Access. Number</b> | <b>Gene Symbol</b> |
|------------------------------|---------------|-----------------------|--------------------|
| 2.03                         | 0.0491        | NM_020753             | <i>CASKIN2</i>     |
| 2.03                         | 0.0306        | NM_032039             | <i>FAM234A</i>     |
| 2.03                         | 0.0030        | NM_003709             | <i>KLF7</i>        |
| 2.03                         | 0.0471        | NM_017635             | <i>KMT5B</i>       |
| 2.03                         | 0.0476        | NM_001407             | <i>CELSR3</i>      |
| 2.03                         | 0.0119        | NM_004383             | <i>CSK</i>         |
| 2.03                         | 0.0293        | NM_016216             | <i>DBR1</i>        |
| 2.02                         | 0.0283        | NM_024552             | <i>CERS4</i>       |
| 2.02                         | 0.0447        | NM_000521             | <i>HEXB</i>        |
| 2.02                         | 0.0242        | NM_030622             | <i>CYP2S1</i>      |
| 2.02                         | 0.0077        | NM_001271854          | <i>GPR176</i>      |
| 2.01                         | 0.0193        | NM_148896             | <i>NPB</i>         |
| 2.01                         | 0.0339        | NM_004657             | <i>SDPR</i>        |
| 2.01                         | 0.0433        | NM_001083885          | <i>WHRN</i>        |
| 2.01                         | 0.0129        | NM_001271823          | <i>SERPINB6</i>    |
| 2.01                         | 0.0005        | NM_003468             | <i>FZD5</i>        |
| 2.01                         | 0.0285        | NM_030765             | <i>B3GNT4</i>      |
| 2.00                         | 0.0178        | NM_004406             | <i>DMBT1</i>       |
| 2.00                         | 0.0234        | NM_001170779          | <i>FAM122C</i>     |
| 2.00                         | 0.0479        | NM_032410             | <i>HOOK3</i>       |
| 2.00                         | 0.0114        | NM_205833             | <i>IGSF1</i>       |
| 2.00                         | 0.0232        | NM_013278             | <i>IL17C</i>       |
| 2.00                         | 0.0466        | NM_198494             | <i>ZFP69</i>       |
| 1.99                         | 0.0226        | NM_001085399          | <i>RELL1</i>       |
| 1.99                         | 0.0215        | NM_020404             | <i>CD248</i>       |
| 1.99                         | 0.0422        | NM_178836             | <i>PLD6</i>        |
| 1.99                         | 0.0323        | NM_001258024          | <i>SKOR1</i>       |
| 1.99                         | 0.0188        | NM_014938             | <i>MLXIP</i>       |
| 1.99                         | 0.0100        | NM_001126049          | <i>KLLN</i>        |
| 1.99                         | 0.0001        | NM_024038             | <i>C19orf43</i>    |
| 1.99                         | 0.0179        | NM_001965             | <i>EGR4</i>        |
| 1.99                         | 0.0389        | NM_017675             | <i>CDHR2</i>       |
| 1.99                         | 0.0483        | NM_032596             | <i>C9orf24</i>     |
| 1.99                         | 0.0289        | NM_000741             | <i>CHRM4</i>       |
| 1.98                         | 0.0039        | NM_001184720          | <i>GYG1</i>        |
| 1.98                         | 0.0422        | NM_020211             | <i>RGMA</i>        |
| 1.98                         | 0.0299        | NM_053049             | <i>UCN3</i>        |

| Enrichment over Day 0 | T-Test | Access. Number | Gene Symbol     |
|-----------------------|--------|----------------|-----------------|
| 1.98                  | 0.0037 | NM_001010927   | <i>TIAM2</i>    |
| 1.98                  | 0.0005 | NM_001286649   | <i>STK24</i>    |
| 1.98                  | 0.0145 | NM_001242474   | <i>ZNF345</i>   |
| 1.98                  | 0.0399 | NM_033280      | <i>SEC11C</i>   |
| 1.98                  | 0.0037 | NM_001243646   | <i>CD2BP2</i>   |
| 1.98                  | 0.0070 | NM_001243135   | <i>PELI3</i>    |
| 1.98                  | 0.0095 | NM_012342      | <i>BAMBI</i>    |
| 1.98                  | 0.0080 | NM_000913      | <i>OPRL1</i>    |
| 1.98                  | 0.0004 | NM_002507      | <i>NGFR</i>     |
| 1.97                  | 0.0090 | NM_014332      | <i>SMPX</i>     |
| 1.97                  | 0.0152 | NM_001143888   | <i>BSDC1</i>    |
| 1.97                  | 0.0180 | NM_020870      | <i>SH3RF1</i>   |
| 1.97                  | 0.0005 | NM_030765      | <i>B3GNT4</i>   |
| 1.97                  | 0.0004 | NM_001286086   | <i>C11orf98</i> |
| 1.97                  | 0.0106 | NM_033255      | <i>EPSTI1</i>   |
| 1.97                  | 0.0169 | NM_000081      | <i>LYST</i>     |
| 1.97                  | 0.0020 | NM_014648      | <i>DZIP3</i>    |
| 1.97                  | 0.0230 | NM_024337      | <i>IRX1</i>     |
| 1.97                  | 0.0387 | NM_003712      | <i>PLPP2</i>    |
| 1.97                  | 0.0023 | NM_001101362   | <i>KBTBD13</i>  |
| 1.96                  | 0.0044 | NM_001005855   | <i>ATP8B2</i>   |
| 1.96                  | 0.0419 | NM_018337      | <i>ZNF444</i>   |
| 1.96                  | 0.0005 | NM_145644      | <i>MRPL35</i>   |
| 1.96                  | 0.0243 | NM_006244      | <i>PPP2R5B</i>  |
| 1.96                  | 0.0100 | NM_015508      | <i>TIPARP</i>   |
| 1.96                  | 0.0063 | NM_001197222   | <i>PDE4D</i>    |
| 1.96                  | 0.0293 | NM_147184      | <i>TP53I3</i>   |
| 1.96                  | 0.0010 | NM_022818      | <i>MAP1LC3B</i> |
| 1.96                  | 0.0025 | NM_001284269   | <i>EFCAB11</i>  |
| 1.96                  | 0.0295 | NM_130466      | <i>UBE3B</i>    |
| 1.96                  | 0.0150 | NM_006681      | <i>NMU</i>      |
| 1.96                  | 0.0012 | NM_031476      | <i>CRISPLD2</i> |
| 1.95                  | 0.0093 | NM_201380      | <i>PLEC</i>     |
| 1.95                  | 0.0289 | NM_005188      | <i>CBL</i>      |
| 1.95                  | 0.0009 | NM_001122770   | <i>ZBTB37</i>   |
| 1.95                  | 0.0338 | NM_052839      | <i>PANX2</i>    |
| 1.94                  | 0.0070 | NM_005839      | <i>SRRM1</i>    |

| <b>Enrichment over Day 0</b> | <b>T-Test</b> | <b>Access. Number</b> | <b>Gene Symbol</b> |
|------------------------------|---------------|-----------------------|--------------------|
| 1.94                         | 0.0060        | NM_001025236          | <i>TSPAN4</i>      |
| 1.94                         | 0.0086        | NM_015175             | <i>NBEAL2</i>      |
| 1.94                         | 0.0377        | NM_001270616          | <i>PROX1</i>       |
| 1.94                         | 0.0008        | NM_003766             | <i>BECN1</i>       |
| 1.94                         | 0.0283        | NM_000336             | <i>SCNN1B</i>      |
| 1.94                         | 0.0489        | NM_201222             | <i>MAGED2</i>      |
| 1.94                         | 0.0469        | NM_198540             | <i>B3GNT8</i>      |
| 1.94                         | 0.0325        | NM_130439             | <i>MXI1</i>        |
| 1.94                         | 0.0211        | NM_001040633          | <i>PRKAG2</i>      |
| 1.93                         | 0.0448        | NM_015912             | <i>FAM135B</i>     |
| 1.93                         | 0.0021        | NM_001166449          | <i>ITIH4</i>       |
| 1.93                         | 0.0442        | NM_053282             | <i>SH2D1B</i>      |
| 1.93                         | 0.0360        | NM_145279             | <i>MOB3C</i>       |
| 1.93                         | 0.0456        | NM_139354             | <i>MATK</i>        |
| 1.93                         | 0.0229        | NM_022106             | <i>FAM217B</i>     |
| 1.93                         | 0.0290        | NM_004585             | <i>RARRES3</i>     |
| 1.93                         | 0.0398        | NM_004404             | <i>SEPT2</i>       |
| 1.93                         | 0.0045        | NM_022044             | <i>SDF2L1</i>      |
| 1.92                         | 0.0189        | NM_001001671          | <i>MAP3K15</i>     |
| 1.92                         | 0.0136        | NM_001099294          | <i>KIAA1644</i>    |
| 1.92                         | 0.0107        | NM_001040715          | <i>KIAA0895L</i>   |
| 1.92                         | 0.0418        | NM_153209             | <i>KIF19</i>       |
| 1.92                         | 0.0020        | NM_007124             | <i>UTRN</i>        |
| 1.92                         | 0.0010        | NM_022365             | <i>DNAJC1</i>      |
| 1.92                         | 0.0057        | NM_001128165          | <i>FBLN7</i>       |
| 1.91                         | 0.0079        | NM_025231             | <i>ZSCAN16</i>     |
| 1.91                         | 0.0216        | NM_021183             | <i>RAP2C</i>       |
| 1.91                         | 0.0352        | NM_183241             | <i>C9orf142</i>    |
| 1.91                         | 0.0026        | NM_022351             | <i>NECAB1</i>      |
| 1.91                         | 0.0012        | NM_152629             | <i>GLIS3</i>       |
| 1.91                         | 0.0233        | NM_001195007          | <i>PPIE</i>        |
| 1.91                         | 0.0266        | NM_013262             | <i>MYLIP</i>       |
| 1.91                         | 0.0067        | NM_001136019          | <i>FCGRT</i>       |
| 1.90                         | 0.0493        | NM_015201             | <i>BOP1</i>        |
| 1.90                         | 0.0261        | NM_032356             | <i>NAA38</i>       |
| 1.90                         | 0.0357        | NM_199289             | <i>NEK5</i>        |
| 1.90                         | 0.0011        | NM_021247             | <i>PRM3</i>        |

| <b>Enrichment over Day 0</b> | <b>T-Test</b> | <b>Access. Number</b> | <b>Gene Symbol</b> |
|------------------------------|---------------|-----------------------|--------------------|
| 1.90                         | 0.0023        | NM_001161364          | <i>NPTN</i>        |
| 1.90                         | 0.0089        | NM_001113349          | <i>ECE1</i>        |
| 1.89                         | 0.0311        | NM_025027             | <i>ZNF606</i>      |
| 1.89                         | 0.0004        | NM_002391             | <i>MDK</i>         |
| 1.89                         | 0.0021        | NM_004286             | <i>GTPBP1</i>      |
| 1.89                         | 0.0194        | NM_022735             | <i>ACBD3</i>       |
| 1.89                         | 0.0222        | NM_005980             | <i>S100P</i>       |
| 1.89                         | 0.0264        | NM_000890             | <i>KCNJ5</i>       |
| 1.89                         | 0.0021        | NM_024958             | <i>NRSN2</i>       |
| 1.89                         | 0.0006        | NM_001039848          | <i>GPX4</i>        |
| 1.89                         | 0.0209        | NM_018064             | <i>AKIRIN2</i>     |
| 1.89                         | 0.0321        | NM_001111019          | <i>NAV2</i>        |
| 1.89                         | 0.0002        | NM_003972             | <i>BTAF1</i>       |
| 1.88                         | 0.0054        | NM_005806             | <i>OLIG2</i>       |
| 1.88                         | 0.0099        | NM_033301             | <i>RPL8</i>        |
| 1.88                         | 0.0004        | NM_032875             | <i>FBXL20</i>      |
| 1.88                         | 0.0476        | NM_033396             | <i>TNKS1BP1</i>    |
| 1.88                         | 0.0015        | NM_001277226          | <i>LGR5</i>        |
| 1.88                         | 0.0038        | NM_014161             | <i>MRPL18</i>      |
| 1.88                         | 0.0221        | NM_015295             | <i>SMCHD1</i>      |
| 1.87                         | 0.0279        | NM_001277115          | <i>DNAH11</i>      |
| 1.87                         | 0.0017        | NM_001029882          | <i>AHDC1</i>       |
| 1.87                         | 0.0379        | NM_001201429          | <i>CABIN1</i>      |
| 1.87                         | 0.0197        | NM_014256             | <i>B3GNT3</i>      |
| 1.87                         | 0.0154        | NM_025090             | <i>USP36</i>       |
| 1.87                         | 0.0034        | NM_207581             | <i>DUOXA2</i>      |
| 1.87                         | 0.0099        | NM_000377             | <i>WAS</i>         |
| 1.87                         | 0.0062        | NM_080588             | <i>PTPN7</i>       |
| 1.87                         | 0.0377        | NM_018210             | <i>NAXD</i>        |
| 1.87                         | 0.0019        | NM_001004058          | <i>OR8K5</i>       |
| 1.87                         | 0.0102        | NM_001098725          | <i>TCL1A</i>       |
| 1.87                         | 0.0067        | NM_005334             | <i>HCFC1</i>       |
| 1.87                         | 0.0279        | NM_001294             | <i>CLPTM1</i>      |
| 1.87                         | 0.0263        | NM_004962             | <i>GDF10</i>       |
| 1.86                         | 0.0192        | NM_001146288          | <i>AIFM3</i>       |
| 1.86                         | 0.0083        | NM_014719             | <i>TCAF1</i>       |
| 1.86                         | 0.0045        | NM_001164761          | <i>PRKAR1B</i>     |

| <b>Enrichment over Day 0</b> | <b>T-Test</b> | <b>Access. Number</b> | <b>Gene Symbol</b> |
|------------------------------|---------------|-----------------------|--------------------|
| 1.86                         | 0.0239        | NM_001256423          | <i>ARHGAP19</i>    |
| 1.86                         | 0.0464        | NM_001009877          | <i>BRD9</i>        |
| 1.86                         | 0.0196        | NM_001123225          | <i>SYCE3</i>       |
| 1.86                         | 0.0446        | NM_001142317          | <i>TXNL4B</i>      |
| 1.86                         | 0.0025        | NM_001040107          | <i>HVCN1</i>       |
| 1.86                         | 0.0152        | NM_031460             | <i>KCNK17</i>      |
| 1.86                         | 0.0113        | NM_138460             | <i>CMTM5</i>       |
| 1.86                         | 0.0128        | NM_003969             | <i>UBE2M</i>       |
| 1.86                         | 0.0015        | NM_001039617          | <i>ZDHC19</i>      |
| 1.85                         | 0.0009        | NM_015425             | <i>POLR1A</i>      |
| 1.85                         | 0.0091        | NM_002135             | <i>NR4A1</i>       |
| 1.85                         | 0.0150        | NM_001278650          | <i>B3GALT5</i>     |
| 1.85                         | 0.0173        | NM_014874             | <i>MFN2</i>        |
| 1.85                         | 0.0279        | NM_001168214          | <i>C3orf80</i>     |
| 1.85                         | 0.0501        | NM_001270643          | <i>LUC7L2</i>      |
| 1.85                         | 0.0182        | NM_001253815          | <i>SLC52A2</i>     |
| 1.85                         | 0.0446        | NM_001042698          | <i>ZSWIM7</i>      |
| 1.85                         | 0.0157        | NM_001127608          | <i>FAM189A2</i>    |
| 1.85                         | 0.0017        | NM_006018             | <i>HCAR3</i>       |
| 1.85                         | 0.0153        | NM_001248006          | <i>TRIM3</i>       |
| 1.84                         | 0.0416        | NM_001197128          | <i>IRF3</i>        |
| 1.84                         | 0.0184        | NM_014859             | <i>ARHGAP44</i>    |
| 1.84                         | 0.0082        | NM_001042474          | <i>ZNF565</i>      |
| 1.84                         | 0.0108        | NM_001099733          | <i>ADCYAP1</i>     |
| 1.84                         | 0.0011        | NM_152838             | <i>RBM12</i>       |
| 1.84                         | 0.0304        | NM_006290             | <i>TNFAIP3</i>     |
| 1.84                         | 0.0317        | NM_024956             | <i>TMEM62</i>      |
| 1.84                         | 0.0229        | NM_001171934          | <i>CDH23</i>       |
| 1.84                         | 0.0331        | NM_031286             | <i>SH3BGRL3</i>    |
| 1.84                         | 0.0044        | NM_001172412          | <i>VANGL1</i>      |
| 1.83                         | 0.0483        | NM_198042             | <i>PDLIM2</i>      |
| 1.83                         | 0.0011        | NM_000369             | <i>TSHR</i>        |
| 1.83                         | 0.0314        | NM_005809             | <i>PRDX2</i>       |
| 1.83                         | 0.0224        | NM_053002             | <i>MED12L</i>      |
| 1.83                         | 0.0487        | NM_000201             | <i>ICAM1</i>       |
| 1.83                         | 0.0024        | NM_001009894          | <i>C12orf29</i>    |
| 1.83                         | 0.0103        | NM_001619             | <i>GRK2</i>        |

| <b>Enrichment over Day 0</b> | <b>T-Test</b> | <b>Access. Number</b> | <b>Gene Symbol</b> |
|------------------------------|---------------|-----------------------|--------------------|
| 1.83                         | 0.0114        | NM_001033953          | <i>CALCA</i>       |
| 1.83                         | 0.0168        | NM_000626             | <i>CD79B</i>       |
| 1.83                         | 0.0177        | NM_139174             | <i>ADAD2</i>       |
| 1.83                         | 0.0020        | NM_015210             | <i>MTCL1</i>       |
| 1.83                         | 0.0334        | NM_003512             | <i>HIST1H2AC</i>   |
| 1.83                         | 0.0163        | NM_001096             | <i>ACLY</i>        |
| 1.82                         | 0.0059        | NM_001276469          | <i>B4GALNT1</i>    |
| 1.82                         | 0.0367        | NM_002824             | <i>PTMS</i>        |
| 1.82                         | 0.0032        | NM_201569             | <i>SMG7</i>        |
| 1.82                         | 0.0319        | NM_001145277          | <i>NECAP2</i>      |
| 1.82                         | 0.0199        | NM_004390             | <i>CTSH</i>        |
| 1.82                         | 0.0271        | NM_002146             | <i>HOXB3</i>       |
| 1.82                         | 0.0054        | NM_133265             | <i>AMOT</i>        |
| 1.82                         | 0.0093        | NM_207013             | <i>TCEB2</i>       |
| 1.82                         | 0.0008        | NM_001143942          | <i>RBM24</i>       |
| 1.82                         | 0.0152        | NM_001011548          | <i>MAGEA4</i>      |
| 1.82                         | 0.0382        | NM_001062             | <i>TCN1</i>        |
| 1.82                         | 0.0154        | NM_032582             | <i>USP32</i>       |
| 1.82                         | 0.0040        | NM_033405             | <i>HELZ2</i>       |
| 1.81                         | 0.0328        | NM_130832             | <i>OPA1</i>        |
| 1.81                         | 0.0241        | NM_001287601          | <i>THAP5</i>       |
| 1.81                         | 0.0084        | NM_145233             | <i>ZNF625</i>      |
| 1.81                         | 0.0120        | NM_001256279          | <i>ZNF26</i>       |
| 1.81                         | 0.0384        | NM_153183             | <i>NUDT10</i>      |
| 1.81                         | 0.0228        | NM_014747             | <i>RIMS3</i>       |
| 1.81                         | 0.0312        | NM_018440             | <i>PAG1</i>        |
| 1.81                         | 0.0005        | NM_005806             | <i>OLIG2</i>       |
| 1.81                         | 0.0373        | NM_206909             | <i>PSD3</i>        |
| 1.81                         | 0.0047        | NM_001416             | <i>EIF4A1</i>      |
| 1.81                         | 0.0091        | NM_001134773          | <i>STX16</i>       |
| 1.81                         | 0.0127        | NM_014475             | <i>DHDH</i>        |
| 1.81                         | 0.0387        | NM_000117             | <i>EMD</i>         |
| 1.81                         | 0.0073        | NM_139202             | <i>MLC1</i>        |
| 1.81                         | 0.0223        | NM_001423             | <i>EMP1</i>        |
| 1.81                         | 0.0018        | NM_001122772          | <i>AGAP2</i>       |
| 1.80                         | 0.0455        | NM_001204077          | <i>UBE4A</i>       |
| 1.80                         | 0.0007        | NM_001243610          | <i>LMO3</i>        |

| <b>Enrichment over Day 0</b> | <b>T-Test</b> | <b>Access. Number</b> | <b>Gene Symbol</b> |
|------------------------------|---------------|-----------------------|--------------------|
| 1.80                         | 0.0048        | NM_007023             | <i>RAPGEF4</i>     |
| 1.80                         | 0.0170        | NM_001261400          | <i>PSMD9</i>       |
| 1.80                         | 0.0251        | NM_006828             | <i>ASCC3</i>       |
| 1.80                         | 0.0378        | NM_001159747          | <i>CC2D2B</i>      |
| 1.80                         | 0.0179        | NM_002188             | <i>IL13</i>        |
| 1.80                         | 0.0245        | NM_003510             | <i>HIST1H2AK</i>   |
| 1.80                         | 0.0181        | NM_198541             | <i>IGFL1</i>       |
| 1.80                         | 0.0345        | NM_181847             | <i>AMIGO2</i>      |
| 1.80                         | 0.0077        | NM_001032221          | <i>STXBP1</i>      |
| 1.79                         | 0.0113        | NM_001008215          | <i>COA5</i>        |
| 1.79                         | 0.0130        | NM_020299             | <i>AKR1B10</i>     |
| 1.79                         | 0.0243        | NM_014508             | <i>APOBEC3C</i>    |
| 1.79                         | 0.0052        | NM_174855             | <i>IDH3B</i>       |
| 1.79                         | 0.0067        | NM_004333             | <i>BRAF</i>        |
| 1.79                         | 0.0052        | NM_014431             | <i>PALD1</i>       |
| 1.79                         | 0.0339        | NM_001242948          | <i>EPDR1</i>       |
| 1.79                         | 0.0159        | NM_005912             | <i>MC4R</i>        |
| 1.79                         | 0.0218        | NM_018930             | <i>PCDHB10</i>     |
| 1.79                         | 0.0015        | NM_012088             | <i>PGLS</i>        |
| 1.79                         | 0.0403        | NM_005222             | <i>DLX6</i>        |
| 1.79                         | 0.0284        | NM_001233             | <i>CAV2</i>        |
| 1.79                         | 0.0072        | NM_001244973          | <i>NRP1</i>        |
| 1.78                         | 0.0034        | NM_144673             | <i>CMTM2</i>       |
| 1.78                         | 0.0013        | NM_000722             | <i>CACNA2D1</i>    |
| 1.78                         | 0.0004        | NM_005932             | <i>MIPEP</i>       |
| 1.78                         | 0.0069        | NM_017848             | <i>FAM120C</i>     |
| 1.78                         | 0.0412        | NM_212558             | <i>TMEM215</i>     |
| 1.78                         | 0.0290        | NM_031419             | <i>NFKBIZ</i>      |
| 1.78                         | 0.0083        | NM_152649             | <i>MLKL</i>        |
| 1.78                         | 0.0277        | NM_033258             | <i>GNG8</i>        |
| 1.78                         | 0.0131        | NM_003413             | <i>ZIC3</i>        |
| 1.78                         | 0.0061        | NM_145020             | <i>CFAP53</i>      |
| 1.78                         | 0.0005        | NM_015698             | <i>GPKOW</i>       |
| 1.78                         | 0.0209        | NM_017857             | <i>SSH3</i>        |
| 1.78                         | 0.0019        | NM_018126             | <i>TMEM33</i>      |
| 1.78                         | 0.0295        | NM_021974             | <i>POLR2F</i>      |
| 1.78                         | 0.0008        | NM_004718             | <i>COX7A2L</i>     |

| <b>Enrichment over Day 0</b> | <b>T-Test</b> | <b>Access. Number</b> | <b>Gene Symbol</b>  |
|------------------------------|---------------|-----------------------|---------------------|
| 1.78                         | 0.0009        | NM_001080379          | <i>PACRG</i>        |
| 1.78                         | 0.0016        | NM_002881             | <i>RALB</i>         |
| 1.78                         | 0.0073        | NM_004075             | <i>CRY1</i>         |
| 1.78                         | 0.0453        | NM_001242804          | <i>LOC100505549</i> |
| 1.78                         | 0.0272        | NM_001076683          | <i>UBTF</i>         |
| 1.78                         | 0.0166        | NM_014392             | <i>NSG1</i>         |
| 1.78                         | 0.0306        | NM_001171936          | <i>CDH23</i>        |
| 1.77                         | 0.0065        | NM_022457             | <i>RFWD2</i>        |
| 1.77                         | 0.0364        | NM_032993             | <i>GAR1</i>         |
| 1.77                         | 0.0085        | NM_032871             | <i>RELT</i>         |
| 1.77                         | 0.0223        | NM_014288             | <i>ITGB3BP</i>      |
| 1.77                         | 0.0047        | NM_001163809          | <i>WDR81</i>        |
| 1.77                         | 0.0005        | NM_000876             | <i>IGF2R</i>        |
| 1.77                         | 0.0096        | NM_020700             | <i>PPM1H</i>        |
| 1.77                         | 0.0392        | NM_006456             | <i>ST6GALNAC2</i>   |
| 1.77                         | 0.0404        | NM_001166010          | <i>ECI2</i>         |
| 1.77                         | 0.0479        | NM_001242750          | <i>LOC100129924</i> |
| 1.77                         | 0.0007        | NM_005570             | <i>LMAN1</i>        |
| 1.77                         | 0.0020        | NM_152281             | <i>GORAB</i>        |
| 1.77                         | 0.0012        | NM_016194             | <i>GNB5</i>         |
| 1.77                         | 0.0060        | NM_001077620          | <i>PRCD</i>         |
| 1.77                         | 0.0245        | NM_003947             | <i>KALRN</i>        |
| 1.77                         | 0.0242        | NM_001145438          | <i>PGAP2</i>        |
| 1.77                         | 0.0014        | NM_020733             | <i>HEG1</i>         |
| 1.77                         | 0.0219        | NM_078474             | <i>TM2D3</i>        |
| 1.76                         | 0.0013        | NM_001159770          | <i>SLC39A11</i>     |
| 1.76                         | 0.0004        | NM_001035004          | <i>KCNIP4</i>       |
| 1.76                         | 0.0469        | NM_024512             | <i>LRRC2</i>        |
| 1.76                         | 0.0057        | NM_014207             | <i>CD5</i>          |
| 1.76                         | 0.0000        | NM_002353             | <i>TACSTD2</i>      |
| 1.76                         | 0.0213        | NM_001270661          | <i>MARCH6</i>       |
| 1.76                         | 0.0047        | NM_001271856          | <i>GRASP</i>        |
| 1.76                         | 0.0040        | NM_019065             | <i>NECAB2</i>       |
| 1.76                         | 0.0274        | NM_031461             | <i>CRISPLD1</i>     |
| 1.76                         | 0.0070        | NM_033506             | <i>FBXO24</i>       |
| 1.76                         | 0.0488        | NM_001162435          | <i>ANKRD66</i>      |
| 1.76                         | 0.0046        | NM_032446             | <i>MEGF10</i>       |

| <b>Enrichment over Day 0</b> | <b>T-Test</b> | <b>Access. Number</b> | <b>Gene Symbol</b> |
|------------------------------|---------------|-----------------------|--------------------|
| 1.76                         | 0.0039        | NM_017914             | <i>C19orf24</i>    |
| 1.76                         | 0.0051        | NM_001127183          | <i>CFLAR</i>       |
| 1.76                         | 0.0009        | NM_207311             | <i>BICDL1</i>      |
| 1.76                         | 0.0200        | NM_001127482          | <i>SPRYD7</i>      |
| 1.76                         | 0.0082        | NM_016329             | <i>SFMBT1</i>      |
| 1.76                         | 0.0317        | NM_006346             | <i>PIBF1</i>       |
| 1.76                         | 0.0116        | NM_024684             | <i>AAMDC</i>       |
| 1.76                         | 0.0393        | NM_001145770          | <i>ADGRG1</i>      |
| 1.76                         | 0.0395        | NM_000676             | <i>ADORA2B</i>     |
| 1.76                         | 0.0166        | NM_002691             | <i>POLD1</i>       |
| 1.76                         | 0.0372        | NM_001242560          | <i>MAP4K4</i>      |
| 1.75                         | 0.0194        | NM_052846             | <i>EMILIN3</i>     |
| 1.75                         | 0.0119        | NM_005745             | <i>BCAP31</i>      |
| 1.75                         | 0.0470        | NM_173499             | <i>SPATA8</i>      |
| 1.75                         | 0.0013        | NM_001134707          | <i>SARDH</i>       |
| 1.75                         | 0.0006        | NM_033290             | <i>MID1</i>        |
| 1.75                         | 0.0006        | NM_003653             | <i>COPS3</i>       |
| 1.75                         | 0.0393        | NM_005530             | <i>IDH3A</i>       |
| 1.75                         | 0.0369        | NM_005603             | <i>ATP8B1</i>      |
| 1.75                         | 0.0031        | NM_138964             | <i>PROKR1</i>      |
| 1.75                         | 0.0041        | NM_176823             | <i>S100A7A</i>     |
| 1.75                         | 0.0094        | NM_001193621          | <i>PINLYP</i>      |
| 1.75                         | 0.0006        | NM_020984             | <i>CHAT</i>        |
| 1.75                         | 0.0156        | NM_014953             | <i>DIS3</i>        |
| 1.75                         | 0.0293        | NM_001282905          | <i>ZFAND4</i>      |
| 1.75                         | 0.0332        | NM_020773             | <i>TBC1D14</i>     |
| 1.75                         | 0.0227        | NM_000959             | <i>PTGFR</i>       |
| 1.75                         | 0.0328        | NM_033554             | <i>HLA-DPA1</i>    |
| 1.75                         | 0.0489        | NM_012368             | <i>OR2C1</i>       |
| 1.74                         | 0.0483        | NM_001002296          | <i>GOLGA7</i>      |
| 1.74                         | 0.0022        | NM_133433             | <i>NIPBL</i>       |
| 1.74                         | 0.0102        | NM_001144755          | <i>MYBL1</i>       |
| 1.74                         | 0.0114        | NM_015454             | <i>LARP7</i>       |
| 1.74                         | 0.0466        | NM_001452             | <i>FOXF2</i>       |
| 1.74                         | 0.0140        | NM_199046             | <i>TEPP</i>        |
| 1.74                         | 0.0006        | NM_001252090          | <i>MRAS</i>        |
| 1.74                         | 0.0052        | NM_001136108          | <i>R3HCC1</i>      |

| <b>Enrichment over Day 0</b> | <b>T-Test</b> | <b>Access. Number</b> | <b>Gene Symbol</b> |
|------------------------------|---------------|-----------------------|--------------------|
| 1.74                         | 0.0147        | NM_001146029          | <i>SEMA7A</i>      |
| 1.74                         | 0.0210        | NM_175741             | <i>NUTM1</i>       |
| 1.74                         | 0.0478        | NM_015274             | <i>MAN2B2</i>      |
| 1.74                         | 0.0162        | NM_145637             | <i>APOL2</i>       |
| 1.74                         | 0.0220        | NM_001031617          | <i>COX19</i>       |
| 1.74                         | 0.0245        | NM_001288998          | <i>GMIP</i>        |
| 1.74                         | 0.0451        | NM_020069             | <i>ACRV1</i>       |
| 1.74                         | 0.0350        | NM_001040192          | <i>DNAJC28</i>     |
| 1.74                         | 0.0364        | NM_004481             | <i>GALNT2</i>      |
| 1.74                         | 0.0057        | NM_012138             | <i>AATF</i>        |
| 1.74                         | 0.0140        | NM_001033602          | <i>MTUS2</i>       |
| 1.74                         | 0.0168        | NM_015122             | <i>FCHO1</i>       |
| 1.74                         | 0.0396        | NM_173803             | <i>MPV17L</i>      |
| 1.74                         | 0.0104        | NM_001271664          | <i>GOLGA6L22</i>   |
| 1.73                         | 0.0296        | NM_001174068          | <i>SYTL4</i>       |
| 1.73                         | 0.0123        | NM_173553             | <i>TRIML2</i>      |
| 1.73                         | 0.0138        | NM_019106             | <i>SEPT3</i>       |
| 1.73                         | 0.0139        | NM_003500             | <i>ACOX2</i>       |
| 1.73                         | 0.0419        | NM_197974             | <i>BTN3A3</i>      |
| 1.73                         | 0.0406        | NM_001286710          | <i>ACSL1</i>       |
| 1.73                         | 0.0022        | NM_032424             | <i>MSANTD4</i>     |
| 1.73                         | 0.0012        | NM_001146056          | <i>MBOAT7</i>      |
| 1.73                         | 0.0463        | NM_012181             | <i>FKBP8</i>       |
| 1.73                         | 0.0020        | NM_001287593          | <i>CLIC1</i>       |
| 1.73                         | 0.0376        | NM_001122742          | <i>ESR1</i>        |
| 1.73                         | 0.0142        | NM_014737             | <i>RASSF2</i>      |
| 1.73                         | 0.0130        | NM_001178146          | <i>IGSF10</i>      |
| 1.73                         | 0.0157        | NM_017433             | <i>MYO3A</i>       |
| 1.73                         | 0.0114        | NM_001142413          | <i>C9orf47</i>     |
| 1.73                         | 0.0170        | NM_015364             | <i>LY96</i>        |
| 1.73                         | 0.0014        | NM_205768             | <i>ZBTB18</i>      |
| 1.73                         | 0.0362        | NM_024809             | <i>TCTN2</i>       |
| 1.72                         | 0.0200        | NM_001256088          | <i>C11orf45</i>    |
| 1.72                         | 0.0178        | NM_001130991          | <i>HYOU1</i>       |
| 1.72                         | 0.0104        | NM_001006939          | <i>LRRC18</i>      |
| 1.72                         | 0.0047        | NM_001143680          | <i>GSTK1</i>       |
| 1.72                         | 0.0050        | NM_015911             | <i>ZNF691</i>      |

| <b>Enrichment over Day 0</b> | <b>T-Test</b> | <b>Access. Number</b> | <b>Gene Symbol</b> |
|------------------------------|---------------|-----------------------|--------------------|
| 1.72                         | 0.0354        | NM_175733             | <i>SYT9</i>        |
| 1.72                         | 0.0198        | NM_002507             | <i>NGFR</i>        |
| 1.72                         | 0.0043        | NM_001290693          | <i>BECN2</i>       |
| 1.72                         | 0.0036        | NM_015023             | <i>WDTC1</i>       |
| 1.72                         | 0.0212        | NM_014829             | <i>DDX46</i>       |
| 1.72                         | 0.0346        | NM_001256613          | <i>HTR3E</i>       |
| 1.72                         | 0.0053        | NM_005502             | <i>ABCA1</i>       |
| 1.72                         | 0.0113        | NM_001007101          | <i>ZNF484</i>      |
| 1.72                         | 0.0024        | NM_003847             | <i>PEX11A</i>      |
| 1.72                         | 0.0386        | NM_000093             | <i>COL5A1</i>      |
| 1.72                         | 0.0487        | NM_001163149          | <i>ETV1</i>        |
| 1.72                         | 0.0142        | NM_014879             | <i>P2RY14</i>      |
| 1.72                         | 0.0091        | NM_003016             | <i>SRSF2</i>       |
| 1.72                         | 0.0015        | NM_007190             | <i>SEC23IP</i>     |
| 1.72                         | 0.0029        | NM_001204126          | <i>LRMP</i>        |
| 1.72                         | 0.0198        | NM_001251974          | <i>RCAN2</i>       |
| 1.72                         | 0.0208        | NM_018324             | <i>OLAH</i>        |
| 1.72                         | 0.0242        | NM_006068             | <i>TLR6</i>        |
| 1.72                         | 0.0481        | NM_001204118          | <i>CLEC17A</i>     |
| 1.72                         | 0.0098        | NM_153696             | <i>FOLH1B</i>      |
| 1.72                         | 0.0304        | NM_153445             | <i>OR5P3</i>       |
| 1.71                         | 0.0001        | NM_020242             | <i>KIF15</i>       |
| 1.71                         | 0.0014        | NM_015960             | <i>CUTC</i>        |
| 1.71                         | 0.0175        | NM_174902             | <i>LDLRAD3</i>     |
| 1.71                         | 0.0005        | NM_016279             | <i>CDH9</i>        |
| 1.71                         | 0.0082        | NM_001166105          | <i>TADA2A</i>      |
| 1.71                         | 0.0499        | NM_002066             | <i>GML</i>         |
| 1.71                         | 0.0279        | NM_001282699          | <i>FAM107B</i>     |
| 1.71                         | 0.0305        | NM_001127892          | <i>SALL1</i>       |
| 1.71                         | 0.0001        | NM_016725             | <i>FOLR1</i>       |
| 1.71                         | 0.0013        | NM_001284291          | <i>CBLL1</i>       |
| 1.71                         | 0.0448        | NM_152634             | <i>TCEANC</i>      |
| 1.71                         | 0.0011        | NM_031420             | <i>MRPL9</i>       |
| 1.71                         | 0.0490        | NM_006945             | <i>SPRR2D</i>      |
| 1.71                         | 0.0351        | NM_001202431          | <i>PRDX1</i>       |
| 1.71                         | 0.0103        | NM_001678             | <i>ATP1B2</i>      |
| 1.71                         | 0.0084        | NM_001199380          | <i>RNF145</i>      |

| <b>Enrichment over Day 0</b> | <b>T-Test</b> | <b>Access. Number</b> | <b>Gene Symbol</b> |
|------------------------------|---------------|-----------------------|--------------------|
| 1.71                         | 0.0058        | NM_015131             | <i>WDR43</i>       |
| 1.71                         | 0.0274        | NM_000562             | <i>C8A</i>         |
| 1.71                         | 0.0497        | NM_002688             | <i>SEPT5</i>       |
| 1.71                         | 0.0194        | NM_006484             | <i>DYRK1B</i>      |
| 1.70                         | 0.0147        | NM_017592             | <i>MED29</i>       |
| 1.70                         | 0.0334        | NM_001284413          | <i>HACL1</i>       |
| 1.70                         | 0.0051        | NM_173549             | <i>ERICH5</i>      |
| 1.70                         | 0.0134        | NM_020640             | <i>DCUN1D1</i>     |
| 1.70                         | 0.0444        | NM_004642             | <i>CDK2AP1</i>     |
| 1.70                         | 0.0123        | NM_015264             | <i>KIAA0930</i>    |
| 1.70                         | 0.0025        | NM_003186             | <i>TAGLN</i>       |
| 1.70                         | 0.0032        | NM_181842             | <i>ZBTB12</i>      |
| 1.70                         | 0.0069        | NM_001287428          | <i>UPP1</i>        |
| 1.70                         | 0.0355        | NM_013339             | <i>ALG6</i>        |
| 1.70                         | 0.0140        | NM_031284             | <i>ADPGK</i>       |
| 1.70                         | 0.0199        | NM_080760             | <i>DACH1</i>       |
| 1.70                         | 0.0424        | NM_001037637          | <i>BTF3</i>        |
| 1.70                         | 0.0491        | NM_004609             | <i>TCF15</i>       |
| 1.70                         | 0.0030        | NM_001137605          | <i>PARVG</i>       |
| 1.70                         | 0.0388        | NM_153025             | <i>SPATA33</i>     |
| 1.70                         | 0.0193        | NM_001282313          | <i>EXOC7</i>       |
| 1.70                         | 0.0029        | NM_138447             | <i>ZNF689</i>      |
| 1.70                         | 0.0154        | NM_007357             | <i>COG2</i>        |
| 1.70                         | 0.0246        | NM_024837             | <i>ATP8B4</i>      |
| 1.70                         | 0.0476        | NM_022461             | <i>AZI2</i>        |
| 1.70                         | 0.0101        | NM_014293             | <i>NPTXR</i>       |
| 1.69                         | 0.0106        | NM_001259             | <i>CDK6</i>        |
| 1.69                         | 0.0483        | NM_173602             | <i>DIP2B</i>       |
| 1.69                         | 0.0125        | NM_001130010          | <i>C15orf41</i>    |
| 1.69                         | 0.0052        | NM_001195057          | <i>DDIT3</i>       |
| 1.69                         | 0.0023        | NM_147134             | <i>NFX1</i>        |
| 1.69                         | 0.0019        | NM_001281723          | <i>BTB</i>         |
| 1.69                         | 0.0147        | NM_009587             | <i>LGALS9</i>      |
| 1.69                         | 0.0119        | NM_001145064          | <i>GATSL2</i>      |
| 1.69                         | 0.0078        | NM_001135197          | <i>CCDC36</i>      |
| 1.69                         | 0.0186        | NM_003217             | <i>TMBIM6</i>      |
| 1.69                         | 0.0014        | NM_001284353          | <i>KIAA1324</i>    |

| <b>Enrichment over Day 0</b> | <b>T-Test</b> | <b>Access. Number</b> | <b>Gene Symbol</b> |
|------------------------------|---------------|-----------------------|--------------------|
| 1.69                         | 0.0342        | NM_001286837          | <i>RNASEH1</i>     |
| 1.69                         | 0.0030        | NM_001123369          | <i>PPP6C</i>       |
| 1.69                         | 0.0371        | NM_001166243          | <i>FHIT</i>        |
| 1.69                         | 0.0015        | NM_001146186          | <i>PEG3</i>        |
| 1.69                         | 0.0313        | NM_001282680          | <i>GAPVD1</i>      |
| 1.69                         | 0.0149        | NM_138700             | <i>TRIM40</i>      |
| 1.69                         | 0.0328        | NM_000098             | <i>CPT2</i>        |
| 1.69                         | 0.0048        | NM_177538             | <i>CYP20A1</i>     |
| 1.69                         | 0.0136        | NM_019556             | <i>MOSPD1</i>      |
| 1.69                         | 0.0189        | NM_001083620          | <i>GRIA2</i>       |
| 1.69                         | 0.0356        | NM_080927             | <i>DCBLD2</i>      |
| 1.69                         | 0.0333        | NM_001170820          | <i>IFITM10</i>     |
| 1.69                         | 0.0155        | NM_001282567          | <i>ZCCHC17</i>     |
| 1.68                         | 0.0005        | NM_144691             | <i>CAPN12</i>      |
| 1.68                         | 0.0407        | NM_015015             | <i>KDM4B</i>       |
| 1.68                         | 0.0164        | NM_033200             | <i>LMF2</i>        |
| 1.68                         | 0.0325        | NM_032404             | <i>TMPRSS3</i>     |
| 1.68                         | 0.0406        | NM_183357             | <i>ADCY5</i>       |
| 1.68                         | 0.0194        | NM_001040153          | <i>SLAIN1</i>      |
| 1.68                         | 0.0339        | NM_032303             | <i>HSDL2</i>       |
| 1.68                         | 0.0224        | NM_014886             | <i>NSA2</i>        |
| 1.68                         | 0.0140        | NM_003202             | <i>TCF7</i>        |
| 1.68                         | 0.0008        | NM_001099271          | <i>POC5</i>        |
| 1.68                         | 0.0263        | NM_001184702          | <i>GYG2</i>        |
| 1.68                         | 0.0369        | NM_138343             | <i>KLC4</i>        |
| 1.68                         | 0.0281        | NM_001145399          | <i>MPPED2</i>      |
| 1.68                         | 0.0233        | NM_018953             | <i>HOXC5</i>       |
| 1.68                         | 0.0053        | NM_001009905          | <i>B3GNTL1</i>     |
| 1.68                         | 0.0002        | NM_003947             | <i>KALRN</i>       |
| 1.68                         | 0.0235        | NM_001040630          | <i>NCALD</i>       |
| 1.68                         | 0.0039        | NM_152990             | <i>PXT1</i>        |
| 1.68                         | 0.0231        | NM_015063             | <i>SLC8A2</i>      |
| 1.68                         | 0.0443        | NM_012425             | <i>RSU1</i>        |
| 1.68                         | 0.0360        | NM_007178             | <i>STRAP</i>       |
| 1.68                         | 0.0068        | NM_031916             | <i>ROPN1L</i>      |
| 1.68                         | 0.0438        | NM_203401             | <i>STMN1</i>       |
| 1.68                         | 0.0338        | NM_016247             | <i>IMPG2</i>       |

| <b>Enrichment over Day 0</b> | <b>T-Test</b> | <b>Access. Number</b> | <b>Gene Symbol</b> |
|------------------------------|---------------|-----------------------|--------------------|
| 1.67                         | 0.0028        | NM_181523             | <i>PIK3R1</i>      |
| 1.67                         | 0.0125        | NM_001163391          | <i>ZSCAN12</i>     |
| 1.67                         | 0.0041        | NM_001098671          | <i>RASGRP2</i>     |
| 1.67                         | 0.0244        | NM_080918             | <i>DGUOK</i>       |
| 1.67                         | 0.0411        | NM_015705             | <i>SGSM3</i>       |
| 1.67                         | 0.0284        | NM_001024382          | <i>HMBS</i>        |
| 1.67                         | 0.0244        | NM_001160224          | <i>RNF170</i>      |
| 1.67                         | 0.0030        | NM_003052             | <i>SLC34A1</i>     |
| 1.67                         | 0.0349        | NM_001270805          | <i>SYT6</i>        |
| 1.67                         | 0.0494        | NM_000276             | <i>OCRL</i>        |
| 1.67                         | 0.0369        | NM_001201573          | <i>NUBPL</i>       |
| 1.67                         | 0.0450        | NM_001256124          | <i>TRIM65</i>      |
| 1.67                         | 0.0029        | NM_001007249          | <i>OR8G2</i>       |
| 1.67                         | 0.0013        | NM_001172688          | <i>GGA1</i>        |
| 1.67                         | 0.0281        | NM_001242377          | <i>DCP2</i>        |
| 1.67                         | 0.0421        | NM_006559             | <i>KHDRBS1</i>     |
| 1.66                         | 0.0156        | NM_001145639          | <i>GPSM1</i>       |
| 1.66                         | 0.0031        | NM_024043             | <i>DBNDD1</i>      |
| 1.66                         | 0.0157        | NM_003914             | <i>CCNA1</i>       |
| 1.66                         | 0.0406        | NM_177972             | <i>TUB</i>         |
| 1.66                         | 0.0085        | NM_001195087          | <i>GGACT</i>       |
| 1.66                         | 0.0002        | NM_001013663          | <i>PTRHD1</i>      |
| 1.66                         | 0.0025        | NM_007001             | <i>SLC35D2</i>     |
| 1.66                         | 0.0125        | NM_020814             | <i>MARCH4</i>      |
| 1.66                         | 0.0336        | NM_022658             | <i>HOXC8</i>       |
| 1.66                         | 0.0498        | NM_018440             | <i>PAG1</i>        |
| 1.66                         | 0.0389        | NM_013362             | <i>ZNF225</i>      |
| 1.66                         | 0.0456        | NM_001161566          | <i>TNIK</i>        |
| 1.66                         | 0.0114        | NM_006943             | <i>SOX12</i>       |
| 1.66                         | 0.0262        | NM_015251             | <i>ATMIN</i>       |
| 1.66                         | 0.0284        | NM_016302             | <i>CRBN</i>        |
| 1.66                         | 0.0454        | NM_004977             | <i>KCNC3</i>       |
| 1.66                         | 0.0071        | NM_033111             | <i>N4BP2L2</i>     |
| 1.66                         | 0.0019        | NM_030929             | <i>KAZALD1</i>     |
| 1.66                         | 0.0191        | NM_001289021          | <i>KIF6</i>        |
| 1.66                         | 0.0087        | NM_130445             | <i>COL18A1</i>     |
| 1.65                         | 0.0035        | NM_001282759          | <i>TRA2A</i>       |

| <b>Enrichment over Day 0</b> | <b>T-Test</b> | <b>Access. Number</b> | <b>Gene Symbol</b> |
|------------------------------|---------------|-----------------------|--------------------|
| 1.65                         | 0.0409        | NM_000271             | <i>NPC1</i>        |
| 1.65                         | 0.0042        | NM_013379             | <i>DPP7</i>        |
| 1.65                         | 0.0159        | NM_020406             | <i>CD177</i>       |
| 1.65                         | 0.0096        | NM_024567             | <i>HMBOX1</i>      |
| 1.65                         | 0.0019        | NM_003198             | <i>TCEB3</i>       |
| 1.65                         | 0.0160        | NM_032294             | <i>CAMKK1</i>      |
| 1.65                         | 0.0082        | NM_003965             | <i>CCRL2</i>       |
| 1.65                         | 0.0430        | NM_001128159          | <i>VPS53</i>       |
| 1.65                         | 0.0116        | NM_001164712          | <i>AMT</i>         |
| 1.65                         | 0.0028        | NM_001134734          | <i>C1orf94</i>     |
| 1.65                         | 0.0207        | NM_001037162          | <i>ACOT6</i>       |
| 1.65                         | 0.0038        | NM_018951             | <i>HOXA10</i>      |
| 1.65                         | 0.0181        | NM_182511             | <i>CBLN2</i>       |
| 1.65                         | 0.0233        | NM_032088             | <i>PCDHGA8</i>     |
| 1.65                         | 0.0395        | NM_001005181          | <i>OR56B4</i>      |
| 1.65                         | 0.0026        | NM_198567             | <i>SIMC1</i>       |
| 1.65                         | 0.0034        | NM_001145812          | <i>SH2B1</i>       |
| 1.65                         | 0.0289        | NM_001243775          | <i>LIMA1</i>       |
| 1.65                         | 0.0005        | NM_001278491          | <i>ANAPC15</i>     |
| 1.65                         | 0.0294        | NM_001144000          | <i>AGAP5</i>       |
| 1.65                         | 0.0408        | NM_033140             | <i>CALD1</i>       |
| 1.65                         | 0.0500        | NM_139058             | <i>ARX</i>         |
| 1.65                         | 0.0146        | NM_001042664          | <i>PLEKHG5</i>     |
| 1.65                         | 0.0352        | NM_001289050          | <i>SLC22A17</i>    |
| 1.65                         | 0.0008        | NM_000446             | <i>PON1</i>        |
| 1.64                         | 0.0065        | NM_153228             | <i>ANKFN1</i>      |
| 1.64                         | 0.0128        | NM_018431             | <i>DOK5</i>        |
| 1.64                         | 0.0411        | NM_001010888          | <i>ZC3H12B</i>     |
| 1.64                         | 0.0094        | NM_001077710          | <i>FAM110C</i>     |
| 1.64                         | 0.0047        | NM_178329             | <i>CCR3</i>        |
| 1.64                         | 0.0262        | NM_033087             | <i>ALG2</i>        |
| 1.64                         | 0.0271        | NM_001290020          | <i>ARMC4</i>       |
| 1.64                         | 0.0182        | NM_012274             | <i>HYPM</i>        |
| 1.64                         | 0.0030        | NM_001278740          | <i>TSPAN6</i>      |
| 1.64                         | 0.0002        | NM_014508             | <i>APOBEC3C</i>    |
| 1.64                         | 0.0268        | NM_006187             | <i>OAS3</i>        |
| 1.64                         | 0.0263        | NM_001161566          | <i>TNIK</i>        |

| <b>Enrichment over Day 0</b> | <b>T-Test</b> | <b>Access. Number</b> | <b>Gene Symbol</b> |
|------------------------------|---------------|-----------------------|--------------------|
| 1.64                         | 0.0088        | NM_018999             | <i>CCSER2</i>      |
| 1.64                         | 0.0154        | NM_024812             | <i>BAALC</i>       |
| 1.64                         | 0.0144        | NM_024940             | <i>DOCK5</i>       |
| 1.64                         | 0.0482        | NM_001398             | <i>ECH1</i>        |
| 1.64                         | 0.0195        | NM_001128143          | <i>PMS1</i>        |
| 1.64                         | 0.0055        | NM_005920             | <i>MEF2D</i>       |
| 1.64                         | 0.0242        | NM_015075             | <i>IQSEC2</i>      |
| 1.64                         | 0.0206        | NM_001042440          | <i>CAST</i>        |
| 1.64                         | 0.0280        | NM_001136195          | <i>TNPO2</i>       |
| 1.64                         | 0.0467        | NM_001145541          | <i>TCP11L1</i>     |
| 1.64                         | 0.0098        | NM_001282950          | <i>COPS7B</i>      |
| 1.64                         | 0.0027        | NM_001289934          | <i>LRCH4</i>       |
| 1.64                         | 0.0328        | NM_001282360          | <i>ZNF107</i>      |
| 1.63                         | 0.0418        | NM_001201428          | <i>GORASP2</i>     |
| 1.63                         | 0.0174        | NM_001135099          | <i>TMPRSS2</i>     |
| 1.63                         | 0.0479        | NM_001198994          | <i>NADK</i>        |
| 1.63                         | 0.0027        | NM_001039762          | <i>FAM196A</i>     |
| 1.63                         | 0.0054        | NM_001127692          | <i>PCCA</i>        |
| 1.63                         | 0.0001        | NM_198156             | <i>VHL</i>         |
| 1.63                         | 0.0048        | NM_001277207          | <i>P2RY6</i>       |
| 1.63                         | 0.0152        | NM_173582             | <i>PGM2L1</i>      |
| 1.63                         | 0.0009        | NM_201532             | <i>DGKZ</i>        |
| 1.63                         | 0.0052        | NM_025191             | <i>EDEM3</i>       |
| 1.63                         | 0.0466        | NM_152872             | <i>FAS</i>         |
| 1.63                         | 0.0375        | NM_001134665          | <i>TRMT10A</i>     |
| 1.63                         | 0.0184        | NM_001252024          | <i>TRPM1</i>       |
| 1.63                         | 0.0003        | NM_020710             | <i>LRRC47</i>      |
| 1.63                         | 0.0224        | NM_001289021          | <i>KIF6</i>        |
| 1.63                         | 0.0242        | NM_025004             | <i>CCDC15</i>      |
| 1.63                         | 0.0430        | NM_001039877          | <i>STRN4</i>       |
| 1.63                         | 0.0153        | NM_014705             | <i>DOCK4</i>       |
| 1.63                         | 0.0047        | NM_014239             | <i>EIF2B2</i>      |
| 1.63                         | 0.0039        | NM_007113             | <i>TCHH</i>        |
| 1.63                         | 0.0018        | NM_004803             | <i>SLC22A14</i>    |
| 1.63                         | 0.0074        | NM_001831             | <i>CLU</i>         |
| 1.63                         | 0.0057        | NM_144639             | <i>UROC1</i>       |
| 1.63                         | 0.0041        | NM_080491             | <i>GAB2</i>        |

| <b>Enrichment over Day 0</b> | <b>T-Test</b> | <b>Access. Number</b> | <b>Gene Symbol</b> |
|------------------------------|---------------|-----------------------|--------------------|
| 1.63                         | 0.0006        | NM_017526             | <i>LEPROT</i>      |
| 1.63                         | 0.0310        | NM_001949             | <i>E2F3</i>        |
| 1.63                         | 0.0073        | NM_181746             | <i>CERS2</i>       |
| 1.63                         | 0.0241        | NM_012229             | <i>NT5C2</i>       |
| 1.63                         | 0.0082        | NM_001080508          | <i>TBX18</i>       |
| 1.62                         | 0.0055        | NM_023929             | <i>ZBTB10</i>      |
| 1.62                         | 0.0014        | NM_001256676          | <i>STOML1</i>      |
| 1.62                         | 0.0307        | NM_006699             | <i>MAN1A2</i>      |
| 1.62                         | 0.0003        | NM_001199319          | <i>PEX26</i>       |
| 1.62                         | 0.0093        | NM_144590             | <i>ANKRD22</i>     |
| 1.62                         | 0.0097        | NM_001736             | <i>C5AR1</i>       |
| 1.62                         | 0.0135        | NM_004937             | <i>CTNS</i>        |
| 1.62                         | 0.0137        | NM_001142587          | <i>NFYC</i>        |
| 1.62                         | 0.0034        | NM_016733             | <i>LIMK2</i>       |
| 1.62                         | 0.0010        | NM_152688             | <i>KHDRBS2</i>     |
| 1.62                         | 0.0061        | NM_182538             | <i>SPNS3</i>       |
| 1.62                         | 0.0073        | NM_021873             | <i>CDC25B</i>      |
| 1.62                         | 0.0453        | NM_138356             | <i>SHF</i>         |
| 1.62                         | 0.0096        | NM_001258020          | <i>GRIA1</i>       |
| 1.62                         | 0.0047        | NM_147191             | <i>MMP21</i>       |
| 1.62                         | 0.0200        | NM_001077350          | <i>NPRL3</i>       |
| 1.62                         | 0.0053        | NM_001286582          | <i>PHRF1</i>       |
| 1.62                         | 0.0030        | NM_130435             | <i>PTPRE</i>       |
| 1.62                         | 0.0197        | NM_000671             | <i>ADH5</i>        |
| 1.62                         | 0.0038        | NM_014720             | <i>SLK</i>         |
| 1.62                         | 0.0380        | NM_015409             | <i>EP400</i>       |
| 1.62                         | 0.0008        | NM_004330             | <i>BNIP2</i>       |
| 1.62                         | 0.0486        | NM_001289132          | <i>C15orf57</i>    |
| 1.62                         | 0.0197        | NM_001258214          | <i>IL12RB2</i>     |
| 1.62                         | 0.0032        | NM_181846             | <i>ZSCAN22</i>     |
| 1.62                         | 0.0012        | NM_001288804          | <i>HEPACAM2</i>    |
| 1.62                         | 0.0000        | NM_017881             | <i>NMRK1</i>       |
| 1.62                         | 0.0142        | NM_015332             | <i>NUDCD3</i>      |
| 1.62                         | 0.0053        | NM_014338             | <i>PISD</i>        |
| 1.62                         | 0.0113        | NM_001204477          | <i>CDRT4</i>       |
| 1.62                         | 0.0128        | NM_139057             | <i>ADAMTS17</i>    |
| 1.61                         | 0.0231        | NM_001161819          | <i>MYO1B</i>       |

| <b>Enrichment over Day 0</b> | <b>T-Test</b> | <b>Access. Number</b> | <b>Gene Symbol</b> |
|------------------------------|---------------|-----------------------|--------------------|
| 1.61                         | 0.0077        | NM_183419             | <i>RNF19A</i>      |
| 1.61                         | 0.0407        | NM_001080471          | <i>PEAR1</i>       |
| 1.61                         | 0.0325        | NM_002737             | <i>PRKCA</i>       |
| 1.61                         | 0.0385        | NM_001145099          | <i>SLC2A6</i>      |
| 1.61                         | 0.0015        | NM_002267             | <i>KPNA3</i>       |
| 1.61                         | 0.0334        | NM_005873             | <i>RGS19</i>       |
| 1.61                         | 0.0443        | NM_001142621          | <i>TGFBRAP1</i>    |
| 1.61                         | 0.0022        | NM_004598             | <i>SPOCK1</i>      |
| 1.61                         | 0.0011        | NM_001146114          | <i>DIP2A</i>       |
| 1.61                         | 0.0268        | NM_001171868          | <i>TMEM200B</i>    |
| 1.61                         | 0.0176        | NM_001004751          | <i>OR51D1</i>      |
| 1.61                         | 0.0282        | NM_001165036          | <i>OGDH</i>        |
| 1.61                         | 0.0052        | NM_001098831          | <i>MORN4</i>       |
| 1.61                         | 0.0189        | NM_003458             | <i>BSN</i>         |
| 1.61                         | 0.0004        | NM_025216             | <i>WNT10A</i>      |
| 1.61                         | 0.0488        | NM_001081675          | <i>KLHL38</i>      |
| 1.61                         | 0.0292        | NM_004045             | <i>ATOX1</i>       |
| 1.61                         | 0.0347        | NM_021920             | <i>SCT</i>         |
| 1.61                         | 0.0291        | NM_134261             | <i>RORA</i>        |
| 1.61                         | 0.0154        | NM_005188             | <i>CBL</i>         |
| 1.61                         | 0.0417        | NM_172060             | <i>EYA1</i>        |
| 1.61                         | 0.0361        | NM_001288967          | <i>CEP70</i>       |
| 1.61                         | 0.0126        | NM_000395             | <i>CSF2RB</i>      |
| 1.61                         | 0.0092        | NM_002300             | <i>LDHB</i>        |
| 1.61                         | 0.0352        | NM_018030             | <i>OSBPL1A</i>     |
| 1.61                         | 0.0437        | NM_001002254          | <i>AWAT2</i>       |
| 1.61                         | 0.0149        | NM_001011655          | <i>TMEM44</i>      |
| 1.61                         | 0.0227        | NM_000390             | <i>CHM</i>         |
| 1.60                         | 0.0010        | NM_003728             | <i>UNC5C</i>       |
| 1.60                         | 0.0094        | NM_001122965          | <i>RPTN</i>        |
| 1.60                         | 0.0126        | NM_178434             | <i>LCE3C</i>       |
| 1.60                         | 0.0332        | NM_018939             | <i>PCDHB6</i>      |
| 1.60                         | 0.0336        | NM_012353             | <i>OR1C1</i>       |
| 1.60                         | 0.0306        | NM_182577             | <i>ODF3L2</i>      |
| 1.60                         | 0.0334        | NM_198585             | <i>ENTPD8</i>      |
| 1.60                         | 0.0076        | NM_005980             | <i>S100P</i>       |
| 1.60                         | 0.0382        | NM_004767             | <i>GPR37L1</i>     |

| <b>Enrichment over Day 0</b> | <b>T-Test</b> | <b>Access. Number</b> | <b>Gene Symbol</b> |
|------------------------------|---------------|-----------------------|--------------------|
| 1.60                         | 0.0240        | NM_145274             | <i>TMEM99</i>      |
| 1.60                         | 0.0325        | NM_018665             | <i>DDX43</i>       |
| 1.60                         | 0.0025        | NM_001270943          | <i>KLF7</i>        |
| 1.60                         | 0.0038        | NM_001184971          | <i>PACSIN2</i>     |
| 1.60                         | 0.0021        | NM_002929             | <i>GRK1</i>        |
| 1.60                         | 0.0483        | NM_144602             | <i>C16orf78</i>    |
| 1.60                         | 0.0279        | NM_007021             | <i>C10orf10</i>    |
| 1.60                         | 0.0269        | NM_001428             | <i>ENO1</i>        |
| 1.60                         | 0.0064        | NM_001145157          | <i>NR2F2</i>       |
| 1.60                         | 0.0376        | NM_001282430          | <i>LBX2</i>        |
| 1.60                         | 0.0017        | NM_001204192          | <i>TP73</i>        |
| 1.60                         | 0.0227        | NM_001004452          | <i>OR1J4</i>       |
| 1.60                         | 0.0049        | NM_006158             | <i>NEFL</i>        |
| 1.60                         | 0.0436        | NM_138465             | <i>GLI4</i>        |
| 1.60                         | 0.0384        | NM_014586             | <i>HUNK</i>        |
| 1.60                         | 0.0002        | NM_015338             | <i>ASXL1</i>       |
| 1.60                         | 0.0367        | NM_001170795          | <i>ATRAID</i>      |
| 1.60                         | 0.0187        | NM_002232             | <i>KCNA3</i>       |
| 1.60                         | 0.0144        | NM_173614             | <i>NOMO2</i>       |
| 1.60                         | 0.0164        | NM_001193635          | <i>DHRS4L2</i>     |
| 1.60                         | 0.0229        | NM_001040451          | <i>RUFY1</i>       |
| 1.60                         | 0.0274        | NM_000945             | <i>PPP3R1</i>      |
| 1.60                         | 0.0255        | NM_001003827          | <i>TRIM34</i>      |
| 1.60                         | 0.0136        | NM_016309             | <i>LCMT1</i>       |
| 1.60                         | 0.0146        | NM_014673             | <i>EMC2</i>        |
| 1.60                         | 0.0285        | NM_030770             | <i>TMPRSS5</i>     |
| 1.60                         | 0.0010        | NM_017970             | <i>NRDE2</i>       |
| 1.60                         | 0.0070        | NM_018013             | <i>SOBP</i>        |
| 1.60                         | 0.0265        | NM_001169154          | <i>PIH1D3</i>      |
| 1.60                         | 0.0155        | NM_182981             | <i>OSGIN1</i>      |
| 1.60                         | 0.0294        | NM_001031713          | <i>MCUR1</i>       |
| 1.59                         | 0.0037        | NM_001039613          | <i>IAH1</i>        |
| 1.59                         | 0.0387        | NM_001099625          | <i>MTFR1L</i>      |
| 1.59                         | 0.0434        | NM_173211             | <i>TGIF1</i>       |
| 1.59                         | 0.0297        | NM_001407             | <i>CELSR3</i>      |
| 1.59                         | 0.0096        | NM_017838             | <i>NHP2</i>        |
| 1.59                         | 0.0241        | NM_001037663          | <i>EEF1B2</i>      |

| <b>Enrichment over Day 0</b> | <b>T-Test</b> | <b>Access. Number</b> | <b>Gene Symbol</b> |
|------------------------------|---------------|-----------------------|--------------------|
| 1.59                         | 0.0154        | NM_031965             | <i>GSG2</i>        |
| 1.59                         | 0.0104        | NM_206900             | <i>RTN2</i>        |
| 1.59                         | 0.0016        | NM_003071             | <i>HLTF</i>        |
| 1.59                         | 0.0312        | NM_001287008          | <i>SUSD3</i>       |
| 1.59                         | 0.0433        | NM_007068             | <i>DMC1</i>        |
| 1.59                         | 0.0097        | NM_001243877          | <i>TOB1</i>        |
| 1.59                         | 0.0352        | NM_001242338          | <i>ATAD2B</i>      |
| 1.59                         | 0.0034        | NM_001164356          | <i>THAP4</i>       |
| 1.59                         | 0.0057        | NM_001171110          | <i>FAM133A</i>     |
| 1.59                         | 0.0008        | NM_001291454          | <i>ATP2C2</i>      |
| 1.59                         | 0.0044        | NM_173465             | <i>COL23A1</i>     |
| 1.59                         | 0.0105        | NM_005642             | <i>TAF7</i>        |
| 1.59                         | 0.0078        | NM_001875             | <i>CPS1</i>        |
| 1.59                         | 0.0040        | NM_003317             | <i>NKX2-1</i>      |
| 1.59                         | 0.0247        | NM_022913             | <i>GPBP1</i>       |
| 1.59                         | 0.0175        | NM_003239             | <i>TGFB3</i>       |
| 1.59                         | 0.0357        | NM_001166108          | <i>PALLD</i>       |
| 1.59                         | 0.0003        | NM_052946             | <i>NOSTRIN</i>     |
| 1.59                         | 0.0034        | NM_001129995          | <i>KCTD15</i>      |
| 1.59                         | 0.0400        | NM_001001662          | <i>ZNF782</i>      |
| 1.58                         | 0.0007        | NM_001287748          | <i>FDFT1</i>       |
| 1.58                         | 0.0329        | NM_000097             | <i>CPOX</i>        |
| 1.58                         | 0.0501        | NM_001004492          | <i>OR2B11</i>      |
| 1.58                         | 0.0217        | NM_001080435          | <i>WHAMM</i>       |
| 1.58                         | 0.0017        | NM_015629             | <i>PRPF31</i>      |
| 1.58                         | 0.0158        | NM_018412             | <i>ST7</i>         |
| 1.58                         | 0.0361        | NM_053003             | <i>SIGLEC12</i>    |
| 1.58                         | 0.0177        | NM_012255             | <i>XRN2</i>        |
| 1.58                         | 0.0233        | NM_001144984          | <i>CCDC169</i>     |
| 1.58                         | 0.0129        | NM_194312             | <i>ESPNL</i>       |
| 1.58                         | 0.0322        | NM_001134836          | <i>SIRPB2</i>      |
| 1.58                         | 0.0233        | NM_016356             | <i>DCDC2</i>       |
| 1.58                         | 0.0024        | NM_024784             | <i>ZBTB3</i>       |
| 1.58                         | 0.0495        | NM_001195386          | <i>TMEM99</i>      |
| 1.58                         | 0.0002        | NM_033135             | <i>PDGFD</i>       |
| 1.58                         | 0.0434        | NM_020203             | <i>MEPE</i>        |
| 1.58                         | 0.0086        | NM_014497             | <i>ZNF638</i>      |

| <b>Enrichment over Day 0</b> | <b>T-Test</b> | <b>Access. Number</b> | <b>Gene Symbol</b>  |
|------------------------------|---------------|-----------------------|---------------------|
| 1.58                         | 0.0169        | NM_003920             | <i>TIMELESS</i>     |
| 1.58                         | 0.0088        | NM_001242898          | <i>PPP6R2</i>       |
| 1.58                         | 0.0146        | NM_001195202          | <i>LOC100129636</i> |
| 1.58                         | 0.0413        | NM_052924             | <i>RHPN1</i>        |
| 1.58                         | 0.0217        | NM_138496             | <i>CYHR1</i>        |
| 1.58                         | 0.0303        | NM_181482             | <i>LDLRAD4</i>      |
| 1.58                         | 0.0097        | NM_181581             | <i>DUS4L</i>        |
| 1.58                         | 0.0116        | NM_181787             | <i>DPY19L4</i>      |
| 1.58                         | 0.0107        | NM_015898             | <i>ZBTB7A</i>       |
| 1.58                         | 0.0018        | NM_020461             | <i>TUBGCP6</i>      |
| 1.58                         | 0.0103        | NM_013943             | <i>CLIC4</i>        |
| 1.58                         | 0.0319        | NM_001164372          | <i>GPN3</i>         |
| 1.58                         | 0.0170        | NM_001270395          | <i>PKIB</i>         |
| 1.58                         | 0.0034        | NM_203288             | <i>RP9</i>          |
| 1.58                         | 0.0297        | NM_001160130          | <i>KCNQ5</i>        |
| 1.58                         | 0.0237        | NM_033405             | <i>HELZ2</i>        |
| 1.58                         | 0.0119        | NM_015305             | <i>ANGEL1</i>       |
| 1.58                         | 0.0399        | NM_012455             | <i>PSD4</i>         |
| 1.57                         | 0.0217        | NM_001010879          | <i>ZIK1</i>         |
| 1.57                         | 0.0096        | NM_004435             | <i>ENDOG</i>        |
| 1.57                         | 0.0269        | NM_183008             | <i>UBXN11</i>       |
| 1.57                         | 0.0423        | NM_005612             | <i>REST</i>         |
| 1.57                         | 0.0028        | NM_001171936          | <i>CDH23</i>        |
| 1.57                         | 0.0176        | NM_001101677          | <i>SOHLH1</i>       |
| 1.57                         | 0.0073        | NM_032024             | <i>C10orf11</i>     |
| 1.57                         | 0.0027        | NM_004885             | <i>NPFFR2</i>       |
| 1.57                         | 0.0251        | NM_001204367          | <i>MGST2</i>        |
| 1.57                         | 0.0319        | NM_004572             | <i>PKP2</i>         |
| 1.57                         | 0.0228        | NM_003248             | <i>THBS4</i>        |
| 1.57                         | 0.0210        | NM_018290             | <i>PGM2</i>         |
| 1.57                         | 0.0218        | NM_001136116          | <i>ZNF879</i>       |
| 1.57                         | 0.0479        | NM_001168378          | <i>ZIC4</i>         |
| 1.57                         | 0.0069        | NM_001031738          | <i>TMEM150A</i>     |
| 1.57                         | 0.0495        | NM_006785             | <i>MALT1</i>        |
| 1.57                         | 0.0246        | NM_005433             | <i>YES1</i>         |
| 1.57                         | 0.0040        | NM_001199096          | <i>BAIAP3</i>       |
| 1.57                         | 0.0161        | NM_080426             | <i>GNAS</i>         |

| <b>Enrichment over Day 0</b> | <b>T-Test</b> | <b>Access. Number</b> | <b>Gene Symbol</b> |
|------------------------------|---------------|-----------------------|--------------------|
| 1.57                         | 0.0300        | NM_016131             | <i>RAB10</i>       |
| 1.57                         | 0.0071        | NM_000597             | <i>IGFBP2</i>      |
| 1.57                         | 0.0004        | NM_001077654          | <i>TNFAIP8</i>     |
| 1.57                         | 0.0210        | NM_002826             | <i>QSOX1</i>       |
| 1.57                         | 0.0358        | NM_014347             | <i>ZNF324</i>      |
| 1.57                         | 0.0056        | NM_001136026          | <i>SEC13</i>       |
| 1.57                         | 0.0001        | NM_178270             | <i>ATG4A</i>       |
| 1.57                         | 0.0336        | NM_178518             | <i>TMEM102</i>     |
| 1.56                         | 0.0069        | NM_003407             | <i>ZFP36</i>       |
| 1.56                         | 0.0101        | NM_024855             | <i>ACTR5</i>       |
| 1.56                         | 0.0443        | NM_001135051          | <i>FAM160B1</i>    |
| 1.56                         | 0.0450        | NM_014410             | <i>CLUL1</i>       |
| 1.56                         | 0.0008        | NM_207113             | <i>SLC37A3</i>     |
| 1.56                         | 0.0144        | NM_001256172          | <i>ZNF85</i>       |
| 1.56                         | 0.0272        | NM_153437             | <i>ODF2</i>        |
| 1.56                         | 0.0376        | NM_015013             | <i>KDM1A</i>       |
| 1.56                         | 0.0007        | NM_000665             | <i>ACHE</i>        |
| 1.56                         | 0.0228        | NM_001290137          | <i>HAGHL</i>       |
| 1.56                         | 0.0426        | NM_002910             | <i>RENBP</i>       |
| 1.56                         | 0.0128        | NM_001270411          | <i>APOBEC3B</i>    |
| 1.56                         | 0.0192        | NM_015038             | <i>KIAA0754</i>    |
| 1.56                         | 0.0019        | NM_002833             | <i>PTPN9</i>       |
| 1.56                         | 0.0014        | NM_033316             | <i>MELTF</i>       |
| 1.56                         | 0.0183        | NM_022896             | <i>LPIN3</i>       |
| 1.56                         | 0.0195        | NM_001103184          | <i>FMN1</i>        |
| 1.56                         | 0.0090        | NM_022358             | <i>KCNK15</i>      |
| 1.56                         | 0.0284        | NM_201286             | <i>USP51</i>       |
| 1.56                         | 0.0102        | NM_021071             | <i>ART4</i>        |
| 1.56                         | 0.0145        | NM_001190947          | <i>TRAF1</i>       |
| 1.56                         | 0.0475        | NM_205837             | <i>LST1</i>        |
| 1.56                         | 0.0010        | NM_001243740          | <i>ZNF124</i>      |
| 1.56                         | 0.0469        | NM_170784             | <i>MKKS</i>        |
| 1.56                         | 0.0009        | NM_001288953          | <i>TTC7A</i>       |
| 1.56                         | 0.0038        | NM_024885             | <i>TAF7L</i>       |
| 1.56                         | 0.0256        | NM_018071             | <i>ARHGEF40</i>    |
| 1.56                         | 0.0092        | NM_001130677          | <i>C17orf96</i>    |
| 1.56                         | 0.0260        | NM_001289807          | <i>CRYAB</i>       |

| <b>Enrichment over Day 0</b> | <b>T-Test</b> | <b>Access. Number</b> | <b>Gene Symbol</b> |
|------------------------------|---------------|-----------------------|--------------------|
| 1.56                         | 0.0445        | NM_001242809          | <i>ANKRD6</i>      |
| 1.56                         | 0.0182        | NM_002431             | <i>MNAT1</i>       |
| 1.56                         | 0.0197        | NM_005971             | <i>FXVD3</i>       |
| 1.56                         | 0.0005        | NM_001146009          | <i>SLCO5A1</i>     |
| 1.56                         | 0.0001        | NM_001243743          | <i>FANCC</i>       |
| 1.56                         | 0.0477        | NM_153182             | <i>MINA</i>        |
| 1.56                         | 0.0212        | NM_175617             | <i>MT1E</i>        |
| 1.56                         | 0.0008        | NM_001276501          | <i>GPSM3</i>       |
| 1.56                         | 0.0238        | NM_001145137          | <i>CPT1B</i>       |
| 1.56                         | 0.0377        | NM_003042             | <i>SLC6A1</i>      |
| 1.56                         | 0.0004        | NM_033204             | <i>ZNF101</i>      |
| 1.56                         | 0.0047        | NM_004001             | <i>FCGR2B</i>      |
| 1.56                         | 0.0039        | NM_002388             | <i>MCM3</i>        |
| 1.56                         | 0.0071        | NM_001033560          | <i>DYX1C1</i>      |
| 1.56                         | 0.0049        | NM_182642             | <i>CTDSP1</i>      |
| 1.56                         | 0.0008        | NM_001278500          | <i>ADORA2A</i>     |
| 1.56                         | 0.0208        | NM_138459             | <i>NUS1</i>        |
| 1.56                         | 0.0285        | NM_139126             | <i>PPIL4</i>       |
| 1.56                         | 0.0089        | NM_173199             | <i>NR4A3</i>       |
| 1.55                         | 0.0021        | NM_001146192          | <i>ZMYND12</i>     |
| 1.55                         | 0.0007        | NM_014981             | <i>MYH15</i>       |
| 1.55                         | 0.0141        | NM_032799             | <i>ZDHHC12</i>     |
| 1.55                         | 0.0040        | NM_001031712          | <i>TRMT11</i>      |
| 1.55                         | 0.0011        | NM_000594             | <i>TNF</i>         |
| 1.55                         | 0.0144        | NM_003883             | <i>HDAC3</i>       |
| 1.55                         | 0.0359        | NM_000914             | <i>OPRM1</i>       |
| 1.55                         | 0.0161        | NM_001201377          | <i>ALDH7A1</i>     |
| 1.55                         | 0.0344        | NM_174905             | <i>FAM98C</i>      |
| 1.55                         | 0.0032        | NM_001136197          | <i>FZR1</i>        |
| 1.55                         | 0.0009        | NM_005545             | <i>ISLR</i>        |
| 1.55                         | 0.0382        | NM_014298             | <i>QPRT</i>        |
| 1.55                         | 0.0199        | NM_001102402          | <i>PCTP</i>        |
| 1.55                         | 0.0366        | NM_021777             | <i>ADAM28</i>      |
| 1.55                         | 0.0057        | NM_004541             | <i>NDUFA1</i>      |
| 1.55                         | 0.0102        | NM_006005             | <i>WFS1</i>        |
| 1.55                         | 0.0200        | NM_006120             | <i>HLA-DMA</i>     |
| 1.55                         | 0.0315        | NM_080821             | <i>FAM210B</i>     |

| <b>Enrichment over Day 0</b> | <b>T-Test</b> | <b>Access. Number</b> | <b>Gene Symbol</b> |
|------------------------------|---------------|-----------------------|--------------------|
| 1.55                         | 0.0225        | NM_152353             | <i>CLDND2</i>      |
| 1.55                         | 0.0400        | NM_001142610          | <i>ULK2</i>        |
| 1.55                         | 0.0000        | NM_012310             | <i>KIF4A</i>       |
| 1.55                         | 0.0171        | NM_018302             | <i>C4orf19</i>     |
| 1.55                         | 0.0420        | NM_001281439          | <i>SMAP1</i>       |
| 1.55                         | 0.0131        | NM_138346             | <i>KIAA2013</i>    |
| 1.55                         | 0.0349        | NM_001134473          | <i>GSE1</i>        |
| 1.55                         | 0.0367        | NM_130901             | <i>OTUD7A</i>      |
| 1.55                         | 0.0232        | NM_207037             | <i>TCF12</i>       |
| 1.55                         | 0.0495        | NM_005425             | <i>TNP2</i>        |
| 1.55                         | 0.0187        | NM_001167990          | <i>PQBP1</i>       |
| 1.55                         | 0.0403        | NM_015150             | <i>RFTN1</i>       |
| 1.55                         | 0.0351        | NM_199482             | <i>MOB4</i>        |
| 1.55                         | 0.0288        | NM_021222             | <i>PRUNE1</i>      |
| 1.55                         | 0.0166        | NM_000392             | <i>ABCC2</i>       |
| 1.55                         | 0.0236        | NM_001199174          | <i>MLST8</i>       |
| 1.55                         | 0.0078        | NM_015575             | <i>GIGYF2</i>      |
| 1.55                         | 0.0227        | NM_020924             | <i>ZBTB26</i>      |
| 1.55                         | 0.0459        | NM_032296             | <i>FLYWCH1</i>     |
| 1.55                         | 0.0063        | NM_006771             | <i>KRT38</i>       |
| 1.55                         | 0.0070        | NM_032636             | <i>PSRC1</i>       |
| 1.55                         | 0.0029        | NM_001009894          | <i>C12orf29</i>    |
| 1.55                         | 0.0355        | NM_001286554          | <i>USP49</i>       |
| 1.54                         | 0.0026        | NM_153325             | <i>DEFB125</i>     |
| 1.54                         | 0.0010        | NM_021246             | <i>LY6G6D</i>      |
| 1.54                         | 0.0061        | NM_001017523          | <i>BTBD11</i>      |
| 1.54                         | 0.0012        | NM_007031             | <i>HSF2BP</i>      |
| 1.54                         | 0.0017        | NM_001009613          | <i>SPANXN4</i>     |
| 1.54                         | 0.0050        | NM_004587             | <i>RRBP1</i>       |
| 1.54                         | 0.0047        | NM_031423             | <i>NUF2</i>        |
| 1.54                         | 0.0002        | NM_005667             | <i>RNF103</i>      |
| 1.54                         | 0.0288        | NM_198239             | <i>WISP3</i>       |
| 1.54                         | 0.0276        | NM_033540             | <i>MFN1</i>        |
| 1.54                         | 0.0342        | NM_015506             | <i>MMACHC</i>      |
| 1.54                         | 0.0102        | NM_006540             | <i>NCOA2</i>       |
| 1.54                         | 0.0379        | NM_003815             | <i>ADAM15</i>      |
| 1.54                         | 0.0394        | NM_000906             | <i>NPR1</i>        |

| <b>Enrichment over Day 0</b> | <b>T-Test</b> | <b>Access. Number</b> | <b>Gene Symbol</b> |
|------------------------------|---------------|-----------------------|--------------------|
| 1.54                         | 0.0250        | NM_002973             | <i>ATXN2</i>       |
| 1.54                         | 0.0024        | NM_017425             | <i>SPA17</i>       |
| 1.54                         | 0.0454        | NM_001171936          | <i>CDH23</i>       |
| 1.54                         | 0.0264        | NM_024623             | <i>OGFOD2</i>      |
| 1.54                         | 0.0002        | NM_014932             | <i>NLGN1</i>       |
| 1.54                         | 0.0337        | NM_001136506          | <i>SLC22A24</i>    |
| 1.54                         | 0.0035        | NM_014437             | <i>SLC39A1</i>     |
| 1.54                         | 0.0398        | NM_198531             | <i>ATP9B</i>       |
| 1.54                         | 0.0051        | NM_020194             | <i>MFF</i>         |
| 1.54                         | 0.0307        | NM_001080435          | <i>WHAMM</i>       |
| 1.54                         | 0.0152        | NM_014034             | <i>ASF1A</i>       |
| 1.54                         | 0.0073        | NM_001253724          | <i>DPYSL5</i>      |
| 1.54                         | 0.0063        | NM_145047             | <i>OSCP1</i>       |
| 1.54                         | 0.0493        | NM_020374             | <i>C12orf4</i>     |
| 1.54                         | 0.0162        | NM_001111309          | <i>PDE4A</i>       |
| 1.54                         | 0.0275        | NM_001199621          | <i>NCOA7</i>       |
| 1.54                         | 0.0472        | NM_001201573          | <i>NUBPL</i>       |
| 1.54                         | 0.0272        | NM_002518             | <i>NPAS2</i>       |
| 1.54                         | 0.0012        | NM_005193             | <i>CDX4</i>        |
| 1.54                         | 0.0253        | NM_019069             | <i>WDR5B</i>       |
| 1.54                         | 0.0361        | NM_014902             | <i>DLGAP4</i>      |
| 1.54                         | 0.0213        | NM_153633             | <i>HOXC4</i>       |
| 1.54                         | 0.0244        | NM_014373             | <i>GPR160</i>      |
| 1.54                         | 0.0053        | NM_001828             | <i>CLC</i>         |
| 1.54                         | 0.0029        | NM_001083607          | <i>PTCH1</i>       |
| 1.54                         | 0.0122        | NM_001105556          | <i>THEMIS2</i>     |
| 1.54                         | 0.0051        | NM_024082             | <i>PRRG3</i>       |
| 1.54                         | 0.0039        | NM_001287001          | <i>ST6GALNAC6</i>  |
| 1.53                         | 0.0087        | NM_152857             | <i>WTAP</i>        |
| 1.53                         | 0.0012        | NM_017416             | <i>IL1RAPL2</i>    |
| 1.53                         | 0.0037        | NM_000495             | <i>COL4A5</i>      |
| 1.53                         | 0.0105        | NM_203504             | <i>G3BP2</i>       |
| 1.53                         | 0.0394        | NM_001284207          | <i>DCAF5</i>       |
| 1.53                         | 0.0410        | NM_001291543          | <i>CT45A7</i>      |
| 1.53                         | 0.0191        | NM_001098722          | <i>GNG4</i>        |
| 1.53                         | 0.0286        | NM_001010905          | <i>C6orf58</i>     |
| 1.53                         | 0.0007        | NM_052896             | <i>CSMD2</i>       |

| <b>Enrichment over Day 0</b> | <b>T-Test</b> | <b>Access. Number</b> | <b>Gene Symbol</b>  |
|------------------------------|---------------|-----------------------|---------------------|
| 1.53                         | 0.0472        | NM_014752             | <i>SPCS2</i>        |
| 1.53                         | 0.0172        | NM_006817             | <i>ERP29</i>        |
| 1.53                         | 0.0196        | NM_001257305          | <i>KRTAP1-4</i>     |
| 1.53                         | 0.0198        | NM_002493             | <i>NDUFB6</i>       |
| 1.53                         | 0.0262        | NM_001008895          | <i>CUL4A</i>        |
| 1.53                         | 0.0084        | NM_004938             | <i>DAPK1</i>        |
| 1.53                         | 0.0172        | NM_170662             | <i>CBLB</i>         |
| 1.53                         | 0.0132        | NM_005116             | <i>SLC23A2</i>      |
| 1.53                         | 0.0254        | NM_001134650          | <i>EIF4E3</i>       |
| 1.53                         | 0.0179        | NM_001202474          | <i>PGR</i>          |
| 1.53                         | 0.0253        | NM_032124             | <i>HDHD2</i>        |
| 1.53                         | 0.0146        | NM_032207             | <i>C19orf44</i>     |
| 1.53                         | 0.0278        | NM_213560             | <i>PKN1</i>         |
| 1.53                         | 0.0227        | NM_012153             | <i>EHF</i>          |
| 1.53                         | 0.0489        | NM_031417             | <i>MARK4</i>        |
| 1.53                         | 0.0365        | NM_001242575          | <i>LOC100130451</i> |
| 1.53                         | 0.0386        | NM_002693             | <i>POLG</i>         |
| 1.53                         | 0.0066        | NM_013328             | <i>PYCR2</i>        |
| 1.53                         | 0.0366        | NM_033113             | <i>ZNF628</i>       |
| 1.53                         | 0.0164        | NM_001783             | <i>CD79A</i>        |
| 1.53                         | 0.0452        | NM_001145006          | <i>MUC7</i>         |
| 1.53                         | 0.0039        | NM_031913             | <i>ESYT3</i>        |
| 1.53                         | 0.0230        | NM_006570             | <i>RRAGA</i>        |
| 1.53                         | 0.0173        | NM_015203             | <i>RPRD2</i>        |
| 1.53                         | 0.0068        | NM_001204744          | <i>CDH16</i>        |
| 1.53                         | 0.0208        | NM_021217             | <i>ZNF77</i>        |
| 1.53                         | 0.0049        | NM_206824             | <i>VKORC1</i>       |
| 1.53                         | 0.0110        | NM_014616             | <i>ATP11B</i>       |
| 1.53                         | 0.0272        | NM_017559             | <i>FNDC8</i>        |
| 1.53                         | 0.0146        | NM_024873             | <i>TNIP3</i>        |
| 1.53                         | 0.0075        | NM_015470             | <i>RAB11FIP5</i>    |
| 1.53                         | 0.0175        | NM_006694             | <i>JTB</i>          |
| 1.53                         | 0.0393        | NM_001136504          | <i>SYT2</i>         |
| 1.53                         | 0.0207        | NM_001267048          | <i>KIAA1324</i>     |
| 1.53                         | 0.0123        | NM_001282587          | <i>H6PD</i>         |
| 1.53                         | 0.0053        | NM_001167912          | <i>VEPH1</i>        |
| 1.53                         | 0.0070        | NM_001161575          | <i>LRRC36</i>       |

| <b>Enrichment over Day 0</b> | <b>T-Test</b> | <b>Access. Number</b> | <b>Gene Symbol</b> |
|------------------------------|---------------|-----------------------|--------------------|
| 1.52                         | 0.0023        | NM_032726             | <i>PLCD4</i>       |
| 1.52                         | 0.0149        | NM_213656             | <i>KRT39</i>       |
| 1.52                         | 0.0138        | NM_001161834          | <i>C7orf72</i>     |
| 1.52                         | 0.0411        | NM_001278063          | <i>SKOR2</i>       |
| 1.52                         | 0.0255        | NM_005528             | <i>DNAJC4</i>      |
| 1.52                         | 0.0464        | NM_175734             | <i>C17orf74</i>    |
| 1.52                         | 0.0041        | NM_001190447          | <i>PPP2R3A</i>     |
| 1.52                         | 0.0050        | NM_025147             | <i>COQ10B</i>      |
| 1.52                         | 0.0161        | NM_006284             | <i>TAF10</i>       |
| 1.52                         | 0.0007        | NM_001136155          | <i>ERG</i>         |
| 1.52                         | 0.0087        | NM_001024212          | <i>S100A13</i>     |
| 1.52                         | 0.0056        | NM_001190182          | <i>CCDC17</i>      |
| 1.52                         | 0.0060        | NM_178135             | <i>HSD17B13</i>    |
| 1.52                         | 0.0094        | NM_017633             | <i>FAM46A</i>      |
| 1.52                         | 0.0043        | NM_018003             | <i>UACA</i>        |
| 1.52                         | 0.0090        | NM_152832             | <i>FAM89B</i>      |
| 1.52                         | 0.0468        | NM_022486             | <i>SUSD1</i>       |
| 1.52                         | 0.0049        | NM_004052             | <i>BNIP3</i>       |
| 1.52                         | 0.0007        | NM_001167608          | <i>RHBDD1</i>      |
| 1.52                         | 0.0227        | NM_017924             | <i>C14orf119</i>   |
| 1.52                         | 0.0415        | NM_080720             | <i>H2AFB3</i>      |
| 1.52                         | 0.0028        | NM_006979             | <i>SLC39A7</i>     |
| 1.52                         | 0.0226        | NM_001130514          | <i>ERICH4</i>      |
| 1.52                         | 0.0317        | NM_016161             | <i>A4GNT</i>       |
| 1.52                         | 0.0167        | NM_015043             | <i>TBC1D9B</i>     |
| 1.52                         | 0.0019        | NM_175882             | <i>SPPL2C</i>      |
| 1.52                         | 0.0016        | NM_001007523          | <i>F8A2</i>        |
| 1.52                         | 0.0095        | NM_001321             | <i>CSRP2</i>       |
| 1.52                         | 0.0179        | NM_053004             | <i>GNB1L</i>       |
| 1.52                         | 0.0188        | NM_020794             | <i>LRRC7</i>       |
| 1.52                         | 0.0117        | NM_014364             | <i>GAPDHS</i>      |
| 1.52                         | 0.0134        | NM_001253791          | <i>SMIM22</i>      |
| 1.52                         | 0.0275        | NM_005839             | <i>SRRM1</i>       |
| 1.52                         | 0.0310        | NM_021632             | <i>ZNF350</i>      |
| 1.52                         | 0.0097        | NM_006040             | <i>HS3ST4</i>      |
| 1.52                         | 0.0486        | NM_198273             | <i>LYSMD3</i>      |
| 1.52                         | 0.0248        | NM_001127219          | <i>ACCS</i>        |

| <b>Enrichment over Day 0</b> | <b>T-Test</b> | <b>Access. Number</b> | <b>Gene Symbol</b> |
|------------------------------|---------------|-----------------------|--------------------|
| 1.52                         | 0.0441        | NM_015271             | <i>TRIM2</i>       |
| 1.52                         | 0.0309        | NM_004651             | <i>USP11</i>       |
| 1.52                         | 0.0043        | NM_014248             | <i>RBX1</i>        |
| 1.52                         | 0.0346        | NM_152325             | <i>TEX26</i>       |
| 1.51                         | 0.0420        | NM_001139498          | <i>FGF13</i>       |
| 1.51                         | 0.0392        | NM_033180             | <i>OR51B2</i>      |
| 1.51                         | 0.0049        | NM_003588             | <i>CUL4B</i>       |
| 1.51                         | 0.0240        | NM_152460             | <i>C17orf77</i>    |
| 1.51                         | 0.0323        | NM_019601             | <i>SUSD2</i>       |
| 1.51                         | 0.0320        | NM_173635             | <i>SIGLECL1</i>    |
| 1.51                         | 0.0259        | NM_174983             | <i>MFSD12</i>      |
| 1.51                         | 0.0116        | NM_001167670          | <i>TMEM239</i>     |
| 1.51                         | 0.0163        | NM_002743             | <i>PRKCSH</i>      |
| 1.51                         | 0.0234        | NM_001906             | <i>CTRB1</i>       |
| 1.51                         | 0.0361        | NM_017956             | <i>TRMT12</i>      |
| 1.51                         | 0.0117        | NM_003430             | <i>ZNF91</i>       |
| 1.51                         | 0.0066        | NM_001013653          | <i>LRRC26</i>      |
| 1.51                         | 0.0278        | NM_033446             | <i>MVB12B</i>      |
| 1.51                         | 0.0135        | NM_002612             | <i>PDK4</i>        |
| 1.51                         | 0.0142        | NM_001284269          | <i>EFCAB11</i>     |
| 1.51                         | 0.0291        | NM_002751             | <i>MAPK11</i>      |
| 1.51                         | 0.0128        | NM_138331             | <i>RNASE8</i>      |
| 1.51                         | 0.0009        | NM_139319             | <i>SLC17A8</i>     |
| 1.51                         | 0.0046        | NM_032306             | <i>ALKBH7</i>      |
| 1.51                         | 0.0363        | NM_006311             | <i>NCOR1</i>       |
| 1.51                         | 0.0447        | NM_015395             | <i>TECPR1</i>      |
| 1.51                         | 0.0226        | NM_003126             | <i>SPTA1</i>       |
| 1.51                         | 0.0016        | NM_004820             | <i>CYP7B1</i>      |
| 1.51                         | 0.0360        | NM_080872             | <i>UNC5D</i>       |
| 1.51                         | 0.0389        | NM_001142482          | <i>NREP</i>        |
| 1.51                         | 0.0499        | NM_006539             | <i>CACNG3</i>      |
| 1.51                         | 0.0499        | NM_001164104          | <i>MOV10L1</i>     |
| 1.51                         | 0.0289        | NM_001146109          | <i>PTGR1</i>       |
| 1.51                         | 0.0008        | NM_004610             | <i>TCP10</i>       |
| 1.51                         | 0.0027        | NM_023002             | <i>HAPLN4</i>      |
| 1.51                         | 0.0003        | NM_001042581          | <i>SNUPN</i>       |
| 1.51                         | 0.0070        | NM_001037340          | <i>PDE4B</i>       |

| <b>Enrichment over Day 0</b> | <b>T-Test</b> | <b>Access. Number</b> | <b>Gene Symbol</b> |
|------------------------------|---------------|-----------------------|--------------------|
| 1.51                         | 0.0502        | NM_080627             | <i>SOGA1</i>       |
| 1.51                         | 0.0288        | NM_001278098          | <i>GDNF</i>        |
| 1.51                         | 0.0166        | NM_001126336          | <i>VCAN</i>        |
| 1.51                         | 0.0396        | NM_001287049          | <i>SAXO1</i>       |
| 1.51                         | 0.0070        | NM_003145             | <i>SSR2</i>        |
| 1.50                         | 0.0232        | NM_007110             | <i>TEP1</i>        |
| 1.50                         | 0.0031        | NM_004619             | <i>TRAF5</i>       |
| 1.50                         | 0.0458        | NM_003794             | <i>SNX4</i>        |
| 1.50                         | 0.0060        | NM_001004464          | <i>OR10G8</i>      |
| 1.50                         | 0.0121        | NM_001171909          | <i>CXorf40A</i>    |
| 1.50                         | 0.0187        | NM_014222             | <i>NDUFA8</i>      |
| 1.50                         | 0.0032        | NM_001136530          | <i>SERPINE2</i>    |
| 1.50                         | 0.0019        | NM_001081675          | <i>KLHL38</i>      |
| 1.50                         | 0.0128        | NM_000862             | <i>HSD3B1</i>      |
| 1.50                         | 0.0462        | NM_001127180          | <i>MYO7A</i>       |
| 1.50                         | 0.0373        | NM_022464             | <i>SIL1</i>        |
| 1.50                         | 0.0097        | NM_001114635          | <i>PLAG1</i>       |
| 1.50                         | 0.0189        | NM_001134888          | <i>RTL1</i>        |
| 1.50                         | 0.0171        | NM_001033521          | <i>CSTF1</i>       |
| 1.50                         | 0.0155        | NM_006454             | <i>MXD4</i>        |
| 1.50                         | 0.0220        | NM_001134771          | <i>SLC12A5</i>     |
| 1.50                         | 0.0233        | NM_001286756          | <i>ANAPC4</i>      |
| 1.50                         | 0.0016        | NM_001166426          | <i>WDR13</i>       |
| 1.50                         | 0.0384        | NM_144635             | <i>FAM131A</i>     |
| 1.50                         | 0.0418        | NM_031883             | <i>PCDHAC2</i>     |
| 1.50                         | 0.0015        | NM_001004450          | <i>OR1B1</i>       |
| 1.50                         | 0.0314        | NM_207411             | <i>XKR5</i>        |
| 1.50                         | 0.0484        | NM_002277             | <i>KRT31</i>       |
| 1.50                         | 0.0215        | NM_006240             | <i>PPEF1</i>       |
| 1.50                         | 0.0035        | NM_001077693          | <i>ECSCR</i>       |
| 1.50                         | 0.0248        | NM_018998             | <i>FBXW5</i>       |
| 1.50                         | 0.0411        | NM_001031804          | <i>MAF</i>         |
| 1.50                         | 0.0056        | NM_014383             | <i>ZBTB32</i>      |
| 1.50                         | 0.0222        | NM_015322             | <i>FEM1B</i>       |
| 1.50                         | 0.0188        | NM_001083601          | <i>NAA60</i>       |
| 1.50                         | 0.0001        | NM_033011             | <i>PLAT</i>        |
| 1.50                         | 0.0085        | NM_001143841          | <i>TMEM106C</i>    |

| <b>Enrichment over Day 0</b> | <b>T-Test</b> | <b>Access. Number</b> | <b>Gene Symbol</b> |
|------------------------------|---------------|-----------------------|--------------------|
| 1.50                         | 0.0177        | NM_001278790          | <i>GORASP1</i>     |
| 1.50                         | 0.0277        | NM_002003             | <i>FCN1</i>        |
| 1.50                         | 0.0231        | NM_020733             | <i>HEG1</i>        |
| 1.50                         | 0.0207        | NM_173511             | <i>FAM117B</i>     |
| 1.50                         | 0.0466        | NM_007014             | <i>WWP2</i>        |
| 1.50                         | 0.0129        | NM_018132             | <i>CENPQ</i>       |
| 1.50                         | 0.0187        | NM_025049             | <i>PIF1</i>        |
| 1.50                         | 0.0415        | NM_001080453          | <i>INTS1</i>       |
| 1.50                         | 0.0168        | NM_031488             | <i>L3MBTL2</i>     |
| 1.50                         | 0.0013        | NM_001174122          | <i>ZFYVE27</i>     |
| 1.50                         | 0.0046        | NM_001170535          | <i>ATAD3A</i>      |
| 1.50                         | 0.0091        | NM_016613             | <i>FAM198B</i>     |
| 1.50                         | 0.0148        | NM_001127323          | <i>GRM8</i>        |
| 1.50                         | 0.0240        | NM_015062             | <i>PPRC1</i>       |
| 1.50                         | 0.0400        | NM_001720             | <i>BMP8B</i>       |

Supplemental Table 2. Genes with at least 2 sgRNAs enriched  $\geq 1.5$ -fold after T cell killing compared to Day 0 reference control,  $p < 0.05$

| Enrichment over Day 0 | T-Test | Access. Number | Gene Symbol     |
|-----------------------|--------|----------------|-----------------|
| 8.13                  | 0.0123 | NM_152629      | <i>GLIS3</i>    |
| 6.31                  | 0.0159 | NM_001143680   | <i>GSTK1</i>    |
| 5.76                  | 0.0032 | NM_001803      | <i>CD52</i>     |
| 5.11                  | 0.0413 | NM_001030288   | <i>SPN</i>      |
| 5.10                  | 0.0496 | NM_001030288   | <i>SPN</i>      |
| 4.96                  | 0.0002 | NM_173598      | <i>KSR2</i>     |
| 4.44                  | 0.0063 | NM_001803      | <i>CD52</i>     |
| 3.41                  | 0.0005 | NM_005603      | <i>ATP8B1</i>   |
| 3.21                  | 0.0108 | NM_001110354   | <i>ZP3</i>      |
| 3.01                  | 0.0140 | NM_002135      | <i>NR4A1</i>    |
| 2.97                  | 0.0039 | NM_001270616   | <i>PROX1</i>    |
| 2.65                  | 0.0314 | NM_001005855   | <i>ATP8B2</i>   |
| 2.60                  | 0.0033 | NM_006290      | <i>TNFAIP3</i>  |
| 2.54                  | 0.0020 | NM_021960      | <i>MCL1</i>     |
| 2.52                  | 0.0131 | NM_033554      | <i>HLA-DPA1</i> |
| 2.40                  | 0.0357 | NM_001110354   | <i>ZP3</i>      |
| 2.35                  | 0.0260 | NM_001276469   | <i>B4GALNT1</i> |
| 2.26                  | 0.0356 | NM_183419      | <i>RNF19A</i>   |
| 2.16                  | 0.0414 | NM_001039877   | <i>STRN4</i>    |
| 2.11                  | 0.0055 | NM_021960      | <i>MCL1</i>     |
| 2.05                  | 0.0344 | NM_173598      | <i>KSR2</i>     |
| 2.05                  | 0.0034 | NM_133433      | <i>NIPBL</i>    |
| 2.03                  | 0.0476 | NM_001407      | <i>CELSR3</i>   |
| 2.01                  | 0.0285 | NM_030765      | <i>B3GNT4</i>   |
| 1.98                  | 0.0004 | NM_002507      | <i>NGFR</i>     |
| 1.97                  | 0.0005 | NM_030765      | <i>B3GNT4</i>   |
| 1.96                  | 0.0044 | NM_001005855   | <i>ATP8B2</i>   |
| 1.96                  | 0.0025 | NM_001284269   | <i>EFCAB11</i>  |
| 1.95                  | 0.0289 | NM_005188      | <i>CBL</i>      |
| 1.94                  | 0.0070 | NM_005839      | <i>SRRM1</i>    |
| 1.94                  | 0.0377 | NM_001270616   | <i>PROX1</i>    |
| 1.91                  | 0.0012 | NM_152629      | <i>GLIS3</i>    |
| 1.89                  | 0.0222 | NM_005980      | <i>S100P</i>    |
| 1.88                  | 0.0054 | NM_005806      | <i>OLIG2</i>    |

| <b>Enrichment over Day 0</b> | <b>T-Test</b> | <b>Access. Number</b> | <b>Gene Symbol</b> |
|------------------------------|---------------|-----------------------|--------------------|
| 1.85                         | 0.0091        | NM_002135             | <i>NR4A1</i>       |
| 1.84                         | 0.0304        | NM_006290             | <i>TNFAIP3</i>     |
| 1.83                         | 0.0024        | NM_001009894          | <i>C12orf29</i>    |
| 1.82                         | 0.0059        | NM_001276469          | <i>B4GALNT1</i>    |
| 1.82                         | 0.0040        | NM_033405             | <i>HELZ2</i>       |
| 1.81                         | 0.0312        | NM_018440             | <i>PAG1</i>        |
| 1.81                         | 0.0005        | NM_005806             | <i>OLIG2</i>       |
| 1.79                         | 0.0243        | NM_014508             | <i>APOBEC3C</i>    |
| 1.78                         | 0.0306        | NM_001171936          | <i>CDH23</i>       |
| 1.77                         | 0.0245        | NM_003947             | <i>KALRN</i>       |
| 1.77                         | 0.0014        | NM_020733             | <i>HEG1</i>        |
| 1.75                         | 0.0369        | NM_005603             | <i>ATP8B1</i>      |
| 1.75                         | 0.0328        | NM_033554             | <i>HLA-DPA1</i>    |
| 1.74                         | 0.0022        | NM_133433             | <i>NIPBL</i>       |
| 1.72                         | 0.0047        | NM_001143680          | <i>GSTK1</i>       |
| 1.72                         | 0.0198        | NM_002507             | <i>NGFR</i>        |
| 1.68                         | 0.0002        | NM_003947             | <i>KALRN</i>       |
| 1.67                         | 0.0369        | NM_001201573          | <i>NUBPL</i>       |
| 1.66                         | 0.0498        | NM_018440             | <i>PAG1</i>        |
| 1.66                         | 0.0456        | NM_001161566          | <i>TNIK</i>        |
| 1.66                         | 0.0191        | NM_001289021          | <i>KIF6</i>        |
| 1.64                         | 0.0002        | NM_014508             | <i>APOBEC3C</i>    |
| 1.64                         | 0.0263        | NM_001161566          | <i>TNIK</i>        |
| 1.63                         | 0.0224        | NM_001289021          | <i>KIF6</i>        |
| 1.63                         | 0.0430        | NM_001039877          | <i>STRN4</i>       |
| 1.61                         | 0.0077        | NM_183419             | <i>RNF19A</i>      |
| 1.61                         | 0.0488        | NM_001081675          | <i>KLHL38</i>      |
| 1.61                         | 0.0154        | NM_005188             | <i>CBL</i>         |
| 1.60                         | 0.0076        | NM_005980             | <i>S100P</i>       |
| 1.59                         | 0.0297        | NM_001407             | <i>CELSR3</i>      |
| 1.58                         | 0.0217        | NM_001080435          | <i>WHAMM</i>       |
| 1.58                         | 0.0237        | NM_033405             | <i>HELZ2</i>       |
| 1.57                         | 0.0028        | NM_001171936          | <i>CDH23</i>       |
| 1.55                         | 0.0029        | NM_001009894          | <i>C12orf29</i>    |
| 1.54                         | 0.0454        | NM_001171936          | <i>CDH23</i>       |
| 1.54                         | 0.0307        | NM_001080435          | <i>WHAMM</i>       |
| 1.54                         | 0.0472        | NM_001201573          | <i>NUBPL</i>       |

| <b>Enrichment<br/>over Day 0</b> | <b>T-Test</b> | <b>Access. Number</b> | <b>Gene Symbol</b> |
|----------------------------------|---------------|-----------------------|--------------------|
| 1.52                             | 0.0275        | NM_005839             | <i>SRRM1</i>       |
| 1.51                             | 0.0142        | NM_001284269          | <i>EFCAB11</i>     |
| 1.50                             | 0.0019        | NM_001081675          | <i>KLHL38</i>      |
| 1.50                             | 0.0231        | NM_020733             | <i>HEG1</i>        |

Supplemental Table 3. sgRNAs enriched  $\geq 1.5$ -fold after 10 population doublings compared to Day 0 reference control,  $p < 0.05$

| Enrichment over Day 0 | T-Test | Access. Number | Gene Symbol     |
|-----------------------|--------|----------------|-----------------|
| 4.00                  | 0.0137 | NM_001204294   | <i>MUC1</i>     |
| 3.83                  | 0.0237 | NM_001172697   | <i>TSFM</i>     |
| 3.51                  | 0.0177 | NM_001204294   | <i>MUC1</i>     |
| 3.35                  | 0.0050 | NM_001144925   | <i>MX1</i>      |
| 3.24                  | 0.0119 | NM_177454      | <i>FAM171B</i>  |
| 2.91                  | 0.0126 | NM_018103      | <i>LRRC8D</i>   |
| 2.76                  | 0.0001 | NM_145109      | <i>MAP2K3</i>   |
| 2.74                  | 0.0418 | NM_001079881   | <i>PRKD2</i>    |
| 2.70                  | 0.0132 | NM_006577      | <i>B3GNT2</i>   |
| 2.66                  | 0.0115 | NM_001803      | <i>CD52</i>     |
| 2.58                  | 0.0035 | NM_053277      | <i>CLIC6</i>    |
| 2.54                  | 0.0028 | NM_153682      | <i>PIGP</i>     |
| 2.53                  | 0.0235 | NM_001010909   | <i>MUC21</i>    |
| 2.53                  | 0.0273 | NM_080552      | <i>SLC32A1</i>  |
| 2.51                  | 0.0108 | NM_020851      | <i>ISLR2</i>    |
| 2.43                  | 0.0222 | NM_001803      | <i>CD52</i>     |
| 2.40                  | 0.0206 | NM_001030288   | <i>SPN</i>      |
| 2.40                  | 0.0237 | NM_001169110   | <i>SCO2</i>     |
| 2.35                  | 0.0084 | NM_001030288   | <i>SPN</i>      |
| 2.30                  | 0.0001 | NM_002994      | <i>CXCL5</i>    |
| 2.30                  | 0.0106 | NM_033425      | <i>DIXDC1</i>   |
| 2.29                  | 0.0145 | NM_001425      | <i>EMP3</i>     |
| 2.28                  | 0.0147 | NM_002865      | <i>RAB2A</i>    |
| 2.28                  | 0.0113 | NM_139283      | <i>PPTC7</i>    |
| 2.27                  | 0.0019 | NM_001525      | <i>HCRTR1</i>   |
| 2.25                  | 0.0240 | NM_017887      | <i>C1orf123</i> |
| 2.25                  | 0.0241 | NM_015879      | <i>ST8SIA3</i>  |
| 2.23                  | 0.0489 | NM_002699      | <i>POU3F1</i>   |
| 2.23                  | 0.0057 | NM_032451      | <i>SPIRE2</i>   |
| 2.22                  | 0.0072 | NM_001110354   | <i>ZP3</i>      |
| 2.20                  | 0.0492 | NM_030647      | <i>KDM7A</i>    |
| 2.18                  | 0.0309 | NM_000744      | <i>CHRNA4</i>   |
| 2.17                  | 0.0311 | NM_003123      | <i>SPN</i>      |
| 2.15                  | 0.0057 | NM_153240      | <i>NPHP3</i>    |

| <b>Enrichment over Day 0</b> | <b>T-Test</b> | <b>Access. Number</b> | <b>Gene Symbol</b> |
|------------------------------|---------------|-----------------------|--------------------|
| 2.13                         | 0.0149        | NM_033554             | <i>HLA-DPA1</i>    |
| 2.13                         | 0.0251        | NM_022550             | <i>XRCC4</i>       |
| 2.13                         | 0.0019        | NM_001040126          | <i>PQLC2</i>       |
| 2.12                         | 0.0040        | NM_020958             | <i>PPP4R4</i>      |
| 2.12                         | 0.0137        | NM_005603             | <i>ATP8B1</i>      |
| 2.11                         | 0.0293        | NM_001229             | <i>CASP9</i>       |
| 2.08                         | 0.0052        | NM_001136030          | <i>TESPA1</i>      |
| 2.07                         | 0.0084        | NM_006412             | <i>AGPAT2</i>      |
| 2.07                         | 0.0035        | NM_001135057          | <i>LRRC15</i>      |
| 2.05                         | 0.0001        | NM_006499             | <i>LGALS8</i>      |
| 2.05                         | 0.0006        | NM_145887             | <i>PIDD1</i>       |
| 2.03                         | 0.0275        | NM_000391             | <i>TPP1</i>        |
| 2.02                         | 0.0178        | NM_001206736          | <i>NSFL1C</i>      |
| 2.00                         | 0.0290        | NM_197962             | <i>GLRX2</i>       |
| 2.00                         | 0.0463        | NM_020992             | <i>PDLIM1</i>      |
| 1.99                         | 0.0066        | NM_138433             | <i>KLHDC7B</i>     |
| 1.97                         | 0.0181        | NM_001009877          | <i>BRD9</i>        |
| 1.97                         | 0.0044        | NM_080622             | <i>ABHD16B</i>     |
| 1.97                         | 0.0220        | NM_032693             | <i>NAA11</i>       |
| 1.96                         | 0.0338        | NM_001009568          | <i>SMPDL3B</i>     |
| 1.96                         | 0.0369        | NM_001256302          | <i>ETF1</i>        |
| 1.94                         | 0.0085        | NM_001204862          | <i>TCEB1</i>       |
| 1.94                         | 0.0068        | NM_001278116          | <i>L1CAM</i>       |
| 1.91                         | 0.0354        | NM_001111125          | <i>IQSEC2</i>      |
| 1.91                         | 0.0009        | NM_007023             | <i>RAPGEF4</i>     |
| 1.91                         | 0.0150        | NM_007215             | <i>POLG2</i>       |
| 1.91                         | 0.0164        | NM_001037171          | <i>ACOT9</i>       |
| 1.91                         | 0.0003        | NM_015247             | <i>CYLD</i>        |
| 1.91                         | 0.0233        | NM_002698             | <i>POU2F2</i>      |
| 1.91                         | 0.0097        | NM_001137560          | <i>TMEM151B</i>    |
| 1.90                         | 0.0339        | NM_001270616          | <i>PROX1</i>       |
| 1.90                         | 0.0185        | NM_001198656          | <i>AKAP2</i>       |
| 1.89                         | 0.0009        | NM_032878             | <i>ALKBH6</i>      |
| 1.89                         | 0.0036        | NM_194250             | <i>ZNF804A</i>     |
| 1.88                         | 0.0012        | NM_001012991          | <i>KNOP1</i>       |
| 1.87                         | 0.0202        | NM_001076683          | <i>UBTF</i>        |
| 1.87                         | 0.0025        | NM_032511             | <i>FAXC</i>        |

| Enrichment over Day 0 | T-Test | Access. Number | Gene Symbol |
|-----------------------|--------|----------------|-------------|
| 1.87                  | 0.0395 | NM_020979      | SH2B2       |
| 1.86                  | 0.0091 | NM_206827      | RASL11A     |
| 1.86                  | 0.0143 | NM_001001330   | REEP3       |
| 1.86                  | 0.0219 | NM_001282352   | ADAMTS10    |
| 1.86                  | 0.0039 | NM_173598      | KSR2        |
| 1.85                  | 0.0421 | NM_001042410   | ANKZF1      |
| 1.85                  | 0.0153 | NM_002630      | PGC         |
| 1.84                  | 0.0270 | NM_201550      | LRRC10      |
| 1.84                  | 0.0182 | NM_000651      | CR1         |
| 1.84                  | 0.0033 | NM_058244      | WNT8A       |
| 1.84                  | 0.0033 | NM_000641      | IL11        |
| 1.84                  | 0.0287 | NM_018026      | PACS1       |
| 1.84                  | 0.0031 | NM_001256915   | IDNK        |
| 1.83                  | 0.0200 | NM_013272      | SLCO3A1     |
| 1.83                  | 0.0067 | NM_005224      | ARID3A      |
| 1.83                  | 0.0441 | NM_001127196   | CNBP        |
| 1.83                  | 0.0089 | NM_001102654   | NTF3        |
| 1.82                  | 0.0000 | NM_000417      | IL2RA       |
| 1.82                  | 0.0106 | NM_001127216   | GFI1        |
| 1.82                  | 0.0051 | NM_004333      | BRAF        |
| 1.82                  | 0.0011 | NM_001204353   | SPOCK3      |
| 1.81                  | 0.0305 | NM_003857      | GALR2       |
| 1.81                  | 0.0004 | NM_001267548   | ARFRP1      |
| 1.80                  | 0.0306 | NM_001009894   | C12orf29    |
| 1.80                  | 0.0092 | NM_145168      | SDR42E1     |
| 1.79                  | 0.0258 | NM_080391      | PTP4A2      |
| 1.79                  | 0.0368 | NM_022659      | EBF2        |
| 1.79                  | 0.0011 | NM_020452      | ATP8B2      |
| 1.78                  | 0.0145 | NM_016548      | GOLM1       |
| 1.78                  | 0.0000 | NM_145044      | ZNF501      |
| 1.78                  | 0.0075 | NM_182488      | USP12       |
| 1.78                  | 0.0396 | NM_001012279   | SOGA3       |
| 1.78                  | 0.0034 | NM_015140      | TTL12       |
| 1.78                  | 0.0496 | NM_000121      | EPOR        |
| 1.77                  | 0.0267 | NM_177543      | PLPP2       |
| 1.77                  | 0.0008 | NM_018416      | FOXJ2       |
| 1.77                  | 0.0261 | NM_001142534   | SH2D3C      |

| <b>Enrichment over Day 0</b> | <b>T-Test</b> | <b>Access. Number</b> | <b>Gene Symbol</b> |
|------------------------------|---------------|-----------------------|--------------------|
| 1.77                         | 0.0294        | NM_001193301          | <i>SEMA4A</i>      |
| 1.76                         | 0.0126        | NM_032107             | <i>L3MBTL1</i>     |
| 1.76                         | 0.0047        | NM_017882             | <i>CLN6</i>        |
| 1.76                         | 0.0036        | NM_001201429          | <i>CABIN1</i>      |
| 1.76                         | 0.0001        | NM_014290             | <i>TDRD7</i>       |
| 1.76                         | 0.0159        | NM_004564             | <i>GATB</i>        |
| 1.76                         | 0.0487        | NM_194454             | <i>KRIT1</i>       |
| 1.76                         | 0.0051        | NM_001407             | <i>CELSR3</i>      |
| 1.75                         | 0.0081        | NM_133640             | <i>MED22</i>       |
| 1.74                         | 0.0036        | NM_018026             | <i>PACS1</i>       |
| 1.74                         | 0.0001        | NM_001110822          | <i>TDRD12</i>      |
| 1.74                         | 0.0000        | NM_016937             | <i>POLA1</i>       |
| 1.74                         | 0.0430        | NM_000913             | <i>OPRL1</i>       |
| 1.74                         | 0.0275        | NM_001257392          | <i>CD63</i>        |
| 1.74                         | 0.0010        | NM_006984             | <i>CLDN10</i>      |
| 1.73                         | 0.0053        | NM_001042474          | <i>ZNF565</i>      |
| 1.72                         | 0.0055        | NM_207661             | <i>ZC3H14</i>      |
| 1.72                         | 0.0151        | NM_005113             | <i>GOLGA5</i>      |
| 1.72                         | 0.0008        | NM_001258346          | <i>PACRGL</i>      |
| 1.72                         | 0.0058        | NM_002488             | <i>NDUFA2</i>      |
| 1.72                         | 0.0127        | NM_033301             | <i>RPL8</i>        |
| 1.72                         | 0.0073        | NM_138412             | <i>RDH13</i>       |
| 1.72                         | 0.0004        | NM_001122772          | <i>AGAP2</i>       |
| 1.71                         | 0.0012        | NM_001048195          | <i>RCC1</i>        |
| 1.71                         | 0.0006        | NM_178836             | <i>PLD6</i>        |
| 1.71                         | 0.0133        | NM_013305             | <i>ST8SIA5</i>     |
| 1.71                         | 0.0462        | NM_000363             | <i>TNNI3</i>       |
| 1.71                         | 0.0001        | NM_001135655          | <i>LY6H</i>        |
| 1.71                         | 0.0127        | NM_003701             | <i>TNFSF11</i>     |
| 1.71                         | 0.0098        | NM_001099409          | <i>EHBP1L1</i>     |
| 1.70                         | 0.0073        | NM_133459             | <i>CCBE1</i>       |
| 1.70                         | 0.0047        | NM_000537             | <i>REN</i>         |
| 1.70                         | 0.0000        | NM_001170779          | <i>FAM122C</i>     |
| 1.70                         | 0.0384        | NM_006547             | <i>IGF2BP3</i>     |
| 1.70                         | 0.0277        | NM_024122             | <i>APOO</i>        |
| 1.70                         | 0.0495        | NM_001198832          | <i>PDE4DIP</i>     |
| 1.70                         | 0.0012        | NM_014347             | <i>ZNF324</i>      |

| <b>Enrichment over Day 0</b> | <b>T-Test</b> | <b>Access. Number</b> | <b>Gene Symbol</b> |
|------------------------------|---------------|-----------------------|--------------------|
| 1.69                         | 0.0311        | NM_012401             | <i>PLXNB2</i>      |
| 1.69                         | 0.0140        | NM_145644             | <i>MRPL35</i>      |
| 1.69                         | 0.0110        | NM_001144883          | <i>PRICKLE1</i>    |
| 1.69                         | 0.0290        | NM_016354             | <i>SLCO4A1</i>     |
| 1.69                         | 0.0104        | NM_014800             | <i>ELMO1</i>       |
| 1.69                         | 0.0164        | NM_014161             | <i>MRPL18</i>      |
| 1.69                         | 0.0068        | NM_001007527          | <i>LMBRD2</i>      |
| 1.69                         | 0.0228        | NM_001282652          | <i>STIP1</i>       |
| 1.69                         | 0.0028        | NM_014079             | <i>KLF15</i>       |
| 1.69                         | 0.0019        | NM_199047             | <i>TBPL2</i>       |
| 1.69                         | 0.0105        | NM_147134             | <i>NFX1</i>        |
| 1.69                         | 0.0004        | NM_031439             | <i>SOX7</i>        |
| 1.68                         | 0.0062        | NM_001134775          | <i>KLC2</i>        |
| 1.68                         | 0.0264        | NM_033518             | <i>SLC38A5</i>     |
| 1.68                         | 0.0230        | NM_005263             | <i>GFI1</i>        |
| 1.68                         | 0.0022        | NM_001145204          | <i>SHISA9</i>      |
| 1.68                         | 0.0086        | NM_004075             | <i>CRY1</i>        |
| 1.68                         | 0.0072        | NM_001127183          | <i>CFLAR</i>       |
| 1.68                         | 0.0224        | NM_014298             | <i>QPRT</i>        |
| 1.68                         | 0.0175        | NM_006278             | <i>ST3GAL4</i>     |
| 1.68                         | 0.0028        | NM_016562             | <i>TLR7</i>        |
| 1.68                         | 0.0053        | NM_016086             | <i>STYXL1</i>      |
| 1.67                         | 0.0024        | NM_001160302          | <i>SYNJ1</i>       |
| 1.67                         | 0.0025        | NM_032875             | <i>FBXL20</i>      |
| 1.67                         | 0.0148        | NM_030810             | <i>TXNDC5</i>      |
| 1.67                         | 0.0056        | NM_005828             | <i>DCAF7</i>       |
| 1.67                         | 0.0179        | NM_032421             | <i>CLIP2</i>       |
| 1.67                         | 0.0031        | NM_003044             | <i>SLC6A12</i>     |
| 1.67                         | 0.0221        | NM_080622             | <i>ABHD16B</i>     |
| 1.67                         | 0.0375        | NM_000685             | <i>AGTR1</i>       |
| 1.67                         | 0.0016        | NM_001286754          | <i>SYNPO2</i>      |
| 1.67                         | 0.0183        | NM_001290061          | <i>SEMA3B</i>      |
| 1.67                         | 0.0028        | NM_213662             | <i>STAT3</i>       |
| 1.66                         | 0.0260        | NM_004789             | <i>LHX2</i>        |
| 1.66                         | 0.0091        | NM_001940             | <i>ATN1</i>        |
| 1.66                         | 0.0057        | NM_017955             | <i>CDCA4</i>       |
| 1.66                         | 0.0067        | NM_017613             | <i>DONSON</i>      |

| <b>Enrichment over Day 0</b> | <b>T-Test</b> | <b>Access. Number</b> | <b>Gene Symbol</b> |
|------------------------------|---------------|-----------------------|--------------------|
| 1.66                         | 0.0067        | NM_001166105          | <i>TADA2A</i>      |
| 1.66                         | 0.0354        | NM_001253798          | <i>ZNF331</i>      |
| 1.66                         | 0.0226        | NM_001145648          | <i>RASGRF1</i>     |
| 1.66                         | 0.0323        | NM_000161             | <i>GCH1</i>        |
| 1.65                         | 0.0264        | NM_014938             | <i>MLXIP</i>       |
| 1.65                         | 0.0080        | NM_020375             | <i>TIGAR</i>       |
| 1.65                         | 0.0101        | NM_001207008          | <i>AFDN</i>        |
| 1.65                         | 0.0008        | NM_001965             | <i>EGR4</i>        |
| 1.65                         | 0.0034        | NM_005188             | <i>CBL</i>         |
| 1.65                         | 0.0193        | NM_001278613          | <i>PCDH1</i>       |
| 1.65                         | 0.0267        | NM_002235             | <i>KCNA6</i>       |
| 1.65                         | 0.0011        | NM_014053             | <i>FLVCR1</i>      |
| 1.65                         | 0.0026        | NM_003022             | <i>SH3BGRL</i>     |
| 1.65                         | 0.0186        | NM_001002258          | <i>ATP5G3</i>      |
| 1.65                         | 0.0005        | NM_002214             | <i>ITGB8</i>       |
| 1.64                         | 0.0311        | NM_001168393          | <i>CREBRF</i>      |
| 1.64                         | 0.0024        | NM_002027             | <i>FNTA</i>        |
| 1.64                         | 0.0502        | NM_001276469          | <i>B4GALNT1</i>    |
| 1.64                         | 0.0008        | NM_017675             | <i>CDHR2</i>       |
| 1.64                         | 0.0258        | NM_001080524          | <i>C16orf90</i>    |
| 1.64                         | 0.0065        | NM_001171088          | <i>CLCN2</i>       |
| 1.64                         | 0.0029        | NM_006311             | <i>NCOR1</i>       |
| 1.64                         | 0.0016        | NM_025150             | <i>TARS2</i>       |
| 1.64                         | 0.0069        | NM_001113381          | <i>RGS4</i>        |
| 1.64                         | 0.0200        | NM_017881             | <i>NMRK1</i>       |
| 1.63                         | 0.0150        | NM_130901             | <i>OTUD7A</i>      |
| 1.63                         | 0.0150        | NM_001177802          | <i>RANGRF</i>      |
| 1.63                         | 0.0004        | NM_015221             | <i>DNMBP</i>       |
| 1.63                         | 0.0043        | NM_003766             | <i>BECN1</i>       |
| 1.63                         | 0.0114        | NM_019087             | <i>ARL15</i>       |
| 1.63                         | 0.0044        | NM_005917             | <i>MDH1</i>        |
| 1.63                         | 0.0006        | NM_024531             | <i>SLC52A2</i>     |
| 1.63                         | 0.0035        | NM_001270661          | <i>MARCH6</i>      |
| 1.62                         | 0.0283        | NM_019892             | <i>INPP5E</i>      |
| 1.62                         | 0.0126        | NM_001017915          | <i>INPP5D</i>      |
| 1.62                         | 0.0195        | NM_001031628          | <i>SMAGP</i>       |
| 1.62                         | 0.0081        | NM_001039877          | <i>STRN4</i>       |

| <b>Enrichment over Day 0</b> | <b>T-Test</b> | <b>Access. Number</b> | <b>Gene Symbol</b> |
|------------------------------|---------------|-----------------------|--------------------|
| 1.62                         | 0.0035        | NM_014235             | <i>UBL4A</i>       |
| 1.62                         | 0.0324        | NM_145912             | <i>NFAM1</i>       |
| 1.62                         | 0.0011        | NM_001243646          | <i>CD2BP2</i>      |
| 1.62                         | 0.0136        | NM_015985             | <i>ANGPT4</i>      |
| 1.62                         | 0.0068        | NM_001159531          | <i>BEGAIN</i>      |
| 1.62                         | 0.0016        | NM_006828             | <i>ASCC3</i>       |
| 1.62                         | 0.0116        | NM_153213             | <i>ARHGEF19</i>    |
| 1.62                         | 0.0347        | NM_030818             | <i>CCDC130</i>     |
| 1.62                         | 0.0179        | NM_001201407          | <i>ZNF778</i>      |
| 1.61                         | 0.0032        | NM_001004754          | <i>OR51I2</i>      |
| 1.61                         | 0.0008        | NM_001144769          | <i>DST</i>         |
| 1.61                         | 0.0049        | NM_002916             | <i>RFC4</i>        |
| 1.61                         | 0.0149        | NM_001127892          | <i>SALL1</i>       |
| 1.61                         | 0.0222        | NM_001287397          | <i>C6orf1</i>      |
| 1.61                         | 0.0005        | NM_001256653          | <i>ZNF43</i>       |
| 1.61                         | 0.0055        | NM_080862             | <i>SPSB4</i>       |
| 1.61                         | 0.0250        | NM_001040100          | <i>SPTSSB</i>      |
| 1.61                         | 0.0031        | NM_001244871          | <i>DAB2</i>        |
| 1.61                         | 0.0222        | NM_024805             | <i>RBFA</i>        |
| 1.61                         | 0.0231        | NM_001099294          | <i>KIAA1644</i>    |
| 1.61                         | 0.0127        | NM_006662             | <i>SRCAP</i>       |
| 1.61                         | 0.0008        | NM_032889             | <i>MFSD5</i>       |
| 1.60                         | 0.0020        | NM_052886             | <i>MAL2</i>        |
| 1.60                         | 0.0040        | NM_024665             | <i>TBL1XR1</i>     |
| 1.60                         | 0.0116        | NM_002121             | <i>HLA-DPB1</i>    |
| 1.60                         | 0.0016        | NM_020163             | <i>SEMA3G</i>      |
| 1.60                         | 0.0134        | NM_031421             | <i>TTC25</i>       |
| 1.60                         | 0.0009        | NM_024958             | <i>NRSN2</i>       |
| 1.60                         | 0.0224        | NM_001452             | <i>FOXF2</i>       |
| 1.60                         | 0.0318        | NM_001033953          | <i>CALCA</i>       |
| 1.60                         | 0.0083        | NM_018689             | <i>CEMIP</i>       |
| 1.60                         | 0.0477        | NM_014236             | <i>GNPAT</i>       |
| 1.60                         | 0.0018        | NM_015131             | <i>WDR43</i>       |
| 1.60                         | 0.0168        | NM_001005185          | <i>OR6N1</i>       |
| 1.60                         | 0.0152        | NM_020182             | <i>PMEPA1</i>      |
| 1.60                         | 0.0378        | NM_153324             | <i>DEFB123</i>     |
| 1.60                         | 0.0049        | NM_001267698          | <i>CD63</i>        |

| <b>Enrichment over Day 0</b> | <b>T-Test</b> | <b>Access. Number</b> | <b>Gene Symbol</b> |
|------------------------------|---------------|-----------------------|--------------------|
| 1.60                         | 0.0031        | NM_002332             | <i>LRP1</i>        |
| 1.60                         | 0.0077        | NM_014078             | <i>MRPL13</i>      |
| 1.60                         | 0.0093        | NM_020637             | <i>FGF22</i>       |
| 1.59                         | 0.0025        | NM_020436             | <i>SALL4</i>       |
| 1.59                         | 0.0301        | NM_015912             | <i>FAM135B</i>     |
| 1.59                         | 0.0012        | NM_144627             | <i>TSACC</i>       |
| 1.59                         | 0.0403        | NM_001257096          | <i>PAX1</i>        |
| 1.59                         | 0.0000        | NM_004207             | <i>SLC16A3</i>     |
| 1.59                         | 0.0155        | NM_003965             | <i>CCRL2</i>       |
| 1.59                         | 0.0289        | NM_021960             | <i>MCL1</i>        |
| 1.59                         | 0.0325        | NM_001769             | <i>CD9</i>         |
| 1.59                         | 0.0059        | NM_016175             | <i>C5orf45</i>     |
| 1.59                         | 0.0033        | NM_016354             | <i>SLCO4A1</i>     |
| 1.59                         | 0.0094        | NM_002476             | <i>MYL4</i>        |
| 1.59                         | 0.0036        | NM_018132             | <i>CENPQ</i>       |
| 1.59                         | 0.0047        | NM_016261             | <i>TUBD1</i>       |
| 1.59                         | 0.0465        | NM_152448             | <i>TERB2</i>       |
| 1.58                         | 0.0020        | NM_001098794          | <i>FAM160A2</i>    |
| 1.58                         | 0.0048        | NM_021630             | <i>PDLIM2</i>      |
| 1.58                         | 0.0104        | NM_183380             | <i>DST</i>         |
| 1.58                         | 0.0031        | NM_001243254          | <i>DENND5A</i>     |
| 1.58                         | 0.0092        | NM_020726             | <i>NLN</i>         |
| 1.58                         | 0.0266        | NM_001040715          | <i>KIAA0895L</i>   |
| 1.58                         | 0.0066        | NM_207510             | <i>LCNL1</i>       |
| 1.58                         | 0.0317        | NM_001122770          | <i>ZBTB37</i>      |
| 1.58                         | 0.0450        | NM_005391             | <i>PDK3</i>        |
| 1.58                         | 0.0072        | NM_020753             | <i>CASKIN2</i>     |
| 1.58                         | 0.0091        | NM_007068             | <i>DMC1</i>        |
| 1.58                         | 0.0032        | NM_025261             | <i>LY6G6C</i>      |
| 1.58                         | 0.0047        | NM_032356             | <i>NAA38</i>       |
| 1.58                         | 0.0003        | NM_005285             | <i>NPBWR1</i>      |
| 1.58                         | 0.0214        | NM_005304             | <i>FFAR3</i>       |
| 1.58                         | 0.0145        | NM_001190826          | <i>FAM217B</i>     |
| 1.58                         | 0.0007        | NM_153228             | <i>ANKFN1</i>      |
| 1.58                         | 0.0140        | NM_130775             | <i>XAGE5</i>       |
| 1.58                         | 0.0003        | NM_024831             | <i>TGS1</i>        |
| 1.58                         | 0.0000        | NM_014586             | <i>HUNK</i>        |

| <b>Enrichment over Day 0</b> | <b>T-Test</b> | <b>Access. Number</b> | <b>Gene Symbol</b> |
|------------------------------|---------------|-----------------------|--------------------|
| 1.58                         | 0.0012        | NM_032042             | <i>FAM172A</i>     |
| 1.57                         | 0.0396        | NM_001128165          | <i>FBLN7</i>       |
| 1.57                         | 0.0006        | NM_001289021          | <i>KIF6</i>        |
| 1.57                         | 0.0234        | NM_001001479          | <i>SLC35E4</i>     |
| 1.57                         | 0.0057        | NM_017877             | <i>SLC35F6</i>     |
| 1.57                         | 0.0446        | NM_015364             | <i>LY96</i>        |
| 1.57                         | 0.0181        | NM_020404             | <i>CD248</i>       |
| 1.57                         | 0.0402        | NM_025069             | <i>ZNF703</i>      |
| 1.57                         | 0.0094        | NM_003619             | <i>PRSS12</i>      |
| 1.57                         | 0.0003        | NM_001198695          | <i>MFAP4</i>       |
| 1.57                         | 0.0326        | NM_130832             | <i>OPA1</i>        |
| 1.57                         | 0.0140        | NM_032431             | <i>SYVN1</i>       |
| 1.57                         | 0.0130        | NM_018110             | <i>DOK4</i>        |
| 1.57                         | 0.0086        | NM_024717             | <i>MCTP1</i>       |
| 1.57                         | 0.0081        | NM_015264             | <i>KIAA0930</i>    |
| 1.57                         | 0.0027        | NM_001286582          | <i>PHRF1</i>       |
| 1.57                         | 0.0007        | NM_025004             | <i>CCDC15</i>      |
| 1.57                         | 0.0007        | NM_145060             | <i>SKA1</i>        |
| 1.57                         | 0.0018        | NM_020870             | <i>SH3RF1</i>      |
| 1.57                         | 0.0011        | NM_024337             | <i>IRX1</i>        |
| 1.57                         | 0.0004        | NM_017723             | <i>TOR4A</i>       |
| 1.57                         | 0.0169        | NM_003120             | <i>SPI1</i>        |
| 1.57                         | 0.0032        | NM_001197294          | <i>DPYSL3</i>      |
| 1.56                         | 0.0452        | NM_207391             | <i>RGS9BP</i>      |
| 1.56                         | 0.0034        | NM_001038             | <i>SCNN1A</i>      |
| 1.56                         | 0.0005        | NM_001168364          | <i>KRTCAP3</i>     |
| 1.56                         | 0.0027        | NM_016026             | <i>RDH11</i>       |
| 1.56                         | 0.0137        | NM_022351             | <i>NECAB1</i>      |
| 1.56                         | 0.0009        | NM_032876             | <i>AJUBA</i>       |
| 1.56                         | 0.0143        | NM_000056             | <i>BCKDHB</i>      |
| 1.56                         | 0.0247        | NM_152470             | <i>RNF165</i>      |
| 1.56                         | 0.0105        | NM_001037162          | <i>ACOT6</i>       |
| 1.56                         | 0.0138        | NM_015960             | <i>CUTC</i>        |
| 1.56                         | 0.0213        | NM_001135095          | <i>FNDC3B</i>      |
| 1.56                         | 0.0088        | NM_006829             | <i>ADIRF</i>       |
| 1.55                         | 0.0041        | NM_183419             | <i>RNF19A</i>      |
| 1.55                         | 0.0412        | NM_198508             | <i>KLRG2</i>       |

| Enrichment over Day 0 | T-Test | Access. Number | Gene Symbol    |
|-----------------------|--------|----------------|----------------|
| 1.55                  | 0.0002 | NM_032871      | <i>RELT</i>    |
| 1.55                  | 0.0001 | NM_005116      | <i>SLC23A2</i> |
| 1.55                  | 0.0259 | NM_015169      | <i>RRS1</i>    |
| 1.55                  | 0.0017 | NM_021241      | <i>WIZ</i>     |
| 1.55                  | 0.0452 | NM_003000      | <i>SDHB</i>    |
| 1.55                  | 0.0042 | NM_001243942   | <i>PRPSAP2</i> |
| 1.55                  | 0.0456 | NM_203401      | <i>STMN1</i>   |
| 1.55                  | 0.0117 | NM_003033      | <i>ST3GAL1</i> |
| 1.55                  | 0.0150 | NM_001029880   | <i>SFMBT2</i>  |
| 1.55                  | 0.0205 | NM_138375      | <i>CABLES1</i> |
| 1.55                  | 0.0026 | NM_020211      | <i>RGMA</i>    |
| 1.55                  | 0.0208 | NM_006540      | <i>NCOA2</i>   |
| 1.55                  | 0.0026 | NM_173499      | <i>SPATA8</i>  |
| 1.55                  | 0.0122 | NM_001204126   | <i>LRMP</i>    |
| 1.55                  | 0.0035 | NM_020384      | <i>CLDN2</i>   |
| 1.55                  | 0.0071 | NM_019004      | <i>ANKIB1</i>  |
| 1.55                  | 0.0224 | NM_000868      | <i>HTR2C</i>   |
| 1.54                  | 0.0043 | NM_002473      | <i>MYH9</i>    |
| 1.54                  | 0.0246 | NM_001113349   | <i>ECE1</i>    |
| 1.54                  | 0.0118 | NM_000117      | <i>EMD</i>     |
| 1.54                  | 0.0142 | NM_017791      | <i>FLVCR2</i>  |
| 1.54                  | 0.0052 | NM_000369      | <i>TSHR</i>    |
| 1.54                  | 0.0262 | NM_001127896   | <i>CHST8</i>   |
| 1.54                  | 0.0001 | NM_005806      | <i>OLIG2</i>   |
| 1.54                  | 0.0061 | NM_014478      | <i>CRCP</i>    |
| 1.54                  | 0.0020 | NM_001193269   | <i>EML2</i>    |
| 1.54                  | 0.0160 | NM_001145365   | <i>ZNF652</i>  |
| 1.54                  | 0.0071 | NM_024009      | <i>GJB3</i>    |
| 1.54                  | 0.0010 | NM_001258214   | <i>IL12RB2</i> |
| 1.54                  | 0.0347 | NM_001113203   | <i>NACA</i>    |
| 1.54                  | 0.0243 | NM_001144758   | <i>PHLDB1</i>  |
| 1.54                  | 0.0023 | NM_024855      | <i>ACTR5</i>   |
| 1.53                  | 0.0280 | NM_017848      | <i>FAM120C</i> |
| 1.53                  | 0.0064 | NM_022127      | <i>SLC28A3</i> |
| 1.53                  | 0.0209 | NM_001243254   | <i>DENND5A</i> |
| 1.53                  | 0.0107 | NM_025132      | <i>WDR19</i>   |
| 1.53                  | 0.0001 | NM_032088      | <i>PCDHGA8</i> |

| <b>Enrichment over Day 0</b> | <b>T-Test</b> | <b>Access. Number</b> | <b>Gene Symbol</b> |
|------------------------------|---------------|-----------------------|--------------------|
| 1.53                         | 0.0380        | NM_004380             | <i>CREBBP</i>      |
| 1.53                         | 0.0011        | NM_000447             | <i>PSEN2</i>       |
| 1.53                         | 0.0120        | NM_018602             | <i>DNAJA4</i>      |
| 1.53                         | 0.0033        | NM_005723             | <i>TSPAN5</i>      |
| 1.53                         | 0.0215        | NM_002155             | <i>HSPA6</i>       |
| 1.53                         | 0.0432        | NM_017970             | <i>NRDE2</i>       |
| 1.53                         | 0.0324        | NM_152413             | <i>GOT1L1</i>      |
| 1.53                         | 0.0024        | NM_021117             | <i>CRY2</i>        |
| 1.53                         | 0.0061        | NM_001142481          | <i>NREP</i>        |
| 1.53                         | 0.0006        | NM_002600             | <i>PDE4B</i>       |
| 1.53                         | 0.0106        | NM_000863             | <i>HTR1B</i>       |
| 1.53                         | 0.0055        | NM_175902             | <i>OGFOD3</i>      |
| 1.53                         | 0.0077        | NM_003914             | <i>CCNA1</i>       |
| 1.53                         | 0.0005        | NM_020242             | <i>KIF15</i>       |
| 1.53                         | 0.0005        | NM_001032367          | <i>SPINT1</i>      |
| 1.53                         | 0.0085        | NM_015237             | <i>KIAA1107</i>    |
| 1.53                         | 0.0109        | NM_033258             | <i>GNG8</i>        |
| 1.53                         | 0.0088        | NM_001146335          | <i>SLC6A15</i>     |
| 1.53                         | 0.0197        | NM_181700             | <i>PPP2R1B</i>     |
| 1.53                         | 0.0280        | NM_001284269          | <i>EFCAB11</i>     |
| 1.53                         | 0.0010        | NM_001007101          | <i>ZNF484</i>      |
| 1.53                         | 0.0481        | NM_001165973          | <i>NRG3</i>        |
| 1.53                         | 0.0095        | NM_173650             | <i>DNAJC5G</i>     |
| 1.52                         | 0.0435        | NM_014218             | <i>KIR2DL1</i>     |
| 1.52                         | 0.0383        | NM_018715             | <i>RCC2</i>        |
| 1.52                         | 0.0006        | NM_001195602          | <i>SEPHS1</i>      |
| 1.52                         | 0.0012        | NM_001195386          | <i>TMEM99</i>      |
| 1.52                         | 0.0174        | NM_001032221          | <i>STXBP1</i>      |
| 1.52                         | 0.0179        | NM_019595             | <i>ITSN2</i>       |
| 1.52                         | 0.0116        | NM_001202431          | <i>PRDX1</i>       |
| 1.52                         | 0.0110        | NM_005604             | <i>POU3F2</i>      |
| 1.52                         | 0.0051        | NM_017838             | <i>NHP2</i>        |
| 1.52                         | 0.0013        | NM_015575             | <i>GIGYF2</i>      |
| 1.52                         | 0.0054        | NM_207401             | <i>C1orf229</i>    |
| 1.52                         | 0.0170        | NM_005864             | <i>EFS</i>         |
| 1.52                         | 0.0075        | NM_000377             | <i>WAS</i>         |
| 1.52                         | 0.0114        | NM_002289             | <i>LALBA</i>       |

| <b>Enrichment over Day 0</b> | <b>T-Test</b> | <b>Access. Number</b> | <b>Gene Symbol</b> |
|------------------------------|---------------|-----------------------|--------------------|
| 1.52                         | 0.0010        | NM_022456             | <i>RAB3IP</i>      |
| 1.52                         | 0.0069        | NM_001685             | <i>ATP5J</i>       |
| 1.52                         | 0.0242        | NM_001282934          | <i>PRDM15</i>      |
| 1.52                         | 0.0232        | NM_001286693          | <i>RGS22</i>       |
| 1.52                         | 0.0409        | NM_001031738          | <i>TMEM150A</i>    |
| 1.52                         | 0.0335        | NM_001006939          | <i>LRRC18</i>      |
| 1.52                         | 0.0089        | NM_001014380          | <i>KATNAL1</i>     |
| 1.52                         | 0.0028        | NM_207581             | <i>DUOXA2</i>      |
| 1.52                         | 0.0016        | NM_001040633          | <i>PRKAG2</i>      |
| 1.52                         | 0.0013        | NM_201569             | <i>SMG7</i>        |
| 1.52                         | 0.0041        | NM_001136019          | <i>FCGRT</i>       |
| 1.52                         | 0.0015        | NM_012425             | <i>RSU1</i>        |
| 1.52                         | 0.0021        | NM_024003             | <i>L1CAM</i>       |
| 1.52                         | 0.0034        | NM_018210             | <i>NAXD</i>        |
| 1.52                         | 0.0148        | NM_001166301          | <i>DHX40</i>       |
| 1.52                         | 0.0461        | NM_002227             | <i>JAK1</i>        |
| 1.52                         | 0.0020        | NM_005920             | <i>MEF2D</i>       |
| 1.52                         | 0.0006        | NM_001142964          | <i>C22orf46</i>    |
| 1.52                         | 0.0050        | NM_032446             | <i>MEGF10</i>      |
| 1.52                         | 0.0039        | NM_152263             | <i>TPM3</i>        |
| 1.51                         | 0.0185        | NM_001142645          | <i>NEMP2</i>       |
| 1.51                         | 0.0066        | NM_001282690          | <i>SECISBP2</i>    |
| 1.51                         | 0.0327        | NM_003248             | <i>THBS4</i>       |
| 1.51                         | 0.0006        | NM_013339             | <i>ALG6</i>        |
| 1.51                         | 0.0078        | NM_024707             | <i>GEMIN7</i>      |
| 1.51                         | 0.0171        | NM_016045             | <i>PRELID3B</i>    |
| 1.51                         | 0.0030        | NM_001277163          | <i>CEACAM3</i>     |
| 1.51                         | 0.0002        | NM_020959             | <i>ANO8</i>        |
| 1.51                         | 0.0133        | NM_001031700          | <i>FAM198B</i>     |
| 1.51                         | 0.0100        | NM_003500             | <i>ACOX2</i>       |
| 1.51                         | 0.0210        | NM_018155             | <i>SLC25A36</i>    |
| 1.51                         | 0.0062        | NM_198581             | <i>ZC3H6</i>       |
| 1.51                         | 0.0003        | NM_001134707          | <i>SARDH</i>       |
| 1.51                         | 0.0209        | NM_001166449          | <i>ITIH4</i>       |
| 1.51                         | 0.0009        | NM_133368             | <i>RSPRY1</i>      |
| 1.51                         | 0.0123        | NM_006559             | <i>KHDRBS1</i>     |
| 1.51                         | 0.0291        | NM_173553             | <i>TRIML2</i>      |

| <b>Enrichment over Day 0</b> | <b>T-Test</b> | <b>Access. Number</b> | <b>Gene Symbol</b> |
|------------------------------|---------------|-----------------------|--------------------|
| 1.51                         | 0.0014        | NM_004286             | <i>GTPBP1</i>      |
| 1.51                         | 0.0422        | NM_014167             | <i>CCDC59</i>      |
| 1.51                         | 0.0088        | NM_144697             | <i>CIART</i>       |
| 1.51                         | 0.0235        | NM_001079530          | <i>CFC1B</i>       |
| 1.51                         | 0.0190        | NM_152634             | <i>TCEANC</i>      |
| 1.50                         | 0.0105        | NM_177925             | <i>H2AFJ</i>       |
| 1.50                         | 0.0017        | NM_001159770          | <i>SLC39A11</i>    |
| 1.50                         | 0.0213        | NM_004465             | <i>FGF10</i>       |
| 1.50                         | 0.0080        | NM_138334             | <i>JOSD2</i>       |
| 1.50                         | 0.0014        | NM_001080556          | <i>CFAP52</i>      |
| 1.50                         | 0.0030        | NM_015629             | <i>PRPF31</i>      |
| 1.50                         | 0.0108        | NM_001146213          | <i>TBC1D15</i>     |
| 1.50                         | 0.0290        | NM_130795             | <i>RGS3</i>        |
| 1.50                         | 0.0016        | NM_152654             | <i>DAND5</i>       |
| 1.50                         | 0.0004        | NM_000390             | <i>CHM</i>         |
| 1.50                         | 0.0021        | NM_017822             | <i>KANSL2</i>      |
| 1.50                         | 0.0030        | NM_001040630          | <i>NCALD</i>       |
| 1.50                         | 0.0296        | NM_145719             | <i>TIGD3</i>       |
| 1.50                         | 0.0008        | NM_004667             | <i>HERC2</i>       |
| 1.50                         | 0.0149        | NM_014698             | <i>TMEM63A</i>     |
| 1.50                         | 0.0027        | NM_175063             | <i>EMC10</i>       |
| 1.50                         | 0.0435        | NM_018322             | <i>SAYSD1</i>      |
| 1.50                         | 0.0006        | NM_007174             | <i>CIT</i>         |
| 1.50                         | 0.0033        | NM_001163809          | <i>WDR81</i>       |
| 1.50                         | 0.0014        | NM_022167             | <i>XYLT2</i>       |
| 1.50                         | 0.0114        | NM_133433             | <i>NIPBL</i>       |
| 1.50                         | 0.0388        | NM_031953             | <i>SNX25</i>       |
| 1.50                         | 0.0005        | NM_002492             | <i>NDUFB5</i>      |
| 1.50                         | 0.0050        | NM_016309             | <i>LCMT1</i>       |
| 1.50                         | 0.0180        | NM_198156             | <i>VHL</i>         |
| 1.50                         | 0.0192        | NM_002198             | <i>IRF1</i>        |
| 1.50                         | 0.0002        | NM_003129             | <i>SQLE</i>        |
| 1.50                         | 0.0053        | NM_000097             | <i>CPOX</i>        |
| 1.50                         | 0.0395        | NM_001278116          | <i>L1CAM</i>       |
| 1.50                         | 0.0122        | NM_001146288          | <i>AIFM3</i>       |
| 1.50                         | 0.0007        | NM_201647             | <i>STAMBP</i>      |
| 1.50                         | 0.0021        | NM_174905             | <i>FAM98C</i>      |

| <b>Enrichment<br/>over Day 0</b> | <b>T-Test</b> | <b>Access.<br/>Number</b> | <b>Gene Symbol</b> |
|----------------------------------|---------------|---------------------------|--------------------|
| 1.50                             | 0.0080        | NM_001243259              | <i>HINFP</i>       |
| 1.50                             | 0.0401        | NM_004254                 | <i>SLC22A8</i>     |
| 1.50                             | 0.0005        | NM_001190447              | <i>PPP2R3A</i>     |
| 1.50                             | 0.0018        | NM_014671                 | <i>UBE3C</i>       |
| 1.50                             | 0.0089        | NM_022044                 | <i>SDF2L1</i>      |
| 1.50                             | 0.0084        | NM_003947                 | <i>KALRN</i>       |
| 1.50                             | 0.0050        | NM_000554                 | <i>CRX</i>         |
| 1.50                             | 0.0488        | NM_001135776              | <i>ZBTB43</i>      |
| 1.50                             | 0.0005        | NM_024501                 | <i>HOXD1</i>       |
| 1.50                             | 0.0072        | NM_001619                 | <i>GRK2</i>        |
| 1.50                             | 0.0042        | NM_007186                 | <i>CEP250</i>      |
| 1.50                             | 0.0008        | NM_005570                 | <i>LMAN1</i>       |
| 1.50                             | 0.0132        | NM_020143                 | <i>PNO1</i>        |
